# Supplementary material for: Industry views of the UK Soft Drinks Industry Levy: a thematic analysis of elite interviews with food and drink industry professionals, 2018–2020
Source: PubMed Central journal article supplement (PMC10414076; doi:10.1136/bmjopen-2023-072223), 2023-08-09
Supplement: bmjopen-2023-072223.draft_revisions.pdf [file bmjopen-2023-072223.draft_revisions.pdf]

# BMJ Open

BMJ Open is committed to open peer review. As part of this commitment we make the peer review history of every article we publish publicly available.

When an article is published we post the peer reviewers' comments and the authors' responses online. We also post the versions of the paper that were used during peer review. These are the versions that the peer review comments apply to.

The versions of the paper that follow are the versions that were submitted during the peer review process. They are not the versions of record or the final published versions. They should not be cited or distributed as the published version of this manuscript.

BMJ Open is an open access journal and the full, final, typeset and author-corrected version of record of the manuscript is available on our site with no access controls, subscription charges or pay-per-view fees (<http://bmjopen.bmj.com>).

If you have any questions on BMJ Open's open peer review process please email [info.bmjopen@bmj.com](mailto:info.bmjopen@bmj.com)

# BMJ Open

## Industry views of the UK Soft Drinks Industry Levy: a thematic analysis of elite interviews with food and drink industry professionals, 2018-20

|                               |                                                                                                                                                                                                                                                                                                                                                                                                                                                                                                                                                                                                                                                                                                                                                                                                                                                                                                                                                                                                                                                                                                                                |
|-------------------------------|--------------------------------------------------------------------------------------------------------------------------------------------------------------------------------------------------------------------------------------------------------------------------------------------------------------------------------------------------------------------------------------------------------------------------------------------------------------------------------------------------------------------------------------------------------------------------------------------------------------------------------------------------------------------------------------------------------------------------------------------------------------------------------------------------------------------------------------------------------------------------------------------------------------------------------------------------------------------------------------------------------------------------------------------------------------------------------------------------------------------------------|
| Journal:                      | <i>BMJ Open</i>                                                                                                                                                                                                                                                                                                                                                                                                                                                                                                                                                                                                                                                                                                                                                                                                                                                                                                                                                                                                                                                                                                                |
| Manuscript ID                 | bmjopen-2023-072223                                                                                                                                                                                                                                                                                                                                                                                                                                                                                                                                                                                                                                                                                                                                                                                                                                                                                                                                                                                                                                                                                                            |
| Article Type:                 | Original research                                                                                                                                                                                                                                                                                                                                                                                                                                                                                                                                                                                                                                                                                                                                                                                                                                                                                                                                                                                                                                                                                                              |
| Date Submitted by the Author: | 01-Feb-2023                                                                                                                                                                                                                                                                                                                                                                                                                                                                                                                                                                                                                                                                                                                                                                                                                                                                                                                                                                                                                                                                                                                    |
| Complete List of Authors:     | <p>Jones, Catrin; University of Cambridge, MRC Epidemiology Unit<br/>         Forde, Hannah; University of Cambridge, MRC Epidemiology Unit;<br/>         University of Oxford, Nuffield Department of Primary Care Health Sciences<br/>         Penney, Tarra; York University, Global Food System and Policy Research, School of Global Health, Faculty of Health<br/>         Theis, Dolly; University of Cambridge, MRC Epidemiology Unit<br/>         Cummins, Steven; London School of Hygiene &amp; Tropical Medicine, Population Health Innovation Lab, Department of Public Health, Environments &amp; Society, Faculty of Public Health and Policy<br/>         Adams, J; University of Cambridge, MRC Epidemiology Unit<br/>         Law, Cherry; University of Reading, Department of Agri-Food Economics and Marketing<br/>         Rutter, Harry; University of Bath Department of Social and Policy Sciences, Social and Policy Sciences<br/>         Smith, Richard ; University of Exeter, Faculty of Health and Life Sciences<br/>         White, Martin; University of Cambridge, MRC Epidemiology Unit</p> |
| Keywords:                     | Health policy < HEALTH SERVICES ADMINISTRATION & MANAGEMENT, Public health < INFECTIOUS DISEASES, QUALITATIVE RESEARCH                                                                                                                                                                                                                                                                                                                                                                                                                                                                                                                                                                                                                                                                                                                                                                                                                                                                                                                                                                                                         |
|                               |                                                                                                                                                                                                                                                                                                                                                                                                                                                                                                                                                                                                                                                                                                                                                                                                                                                                                                                                                                                                                                                                                                                                |

SCHOLARONE™  
Manuscripts

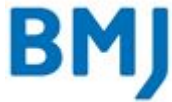

I, the Submitting Author has the right to grant and does grant on behalf of all authors of the Work (as defined in the below author licence), an exclusive licence and/or a non-exclusive licence for contributions from authors who are: i) UK Crown employees; ii) where BMJ has agreed a CC-BY licence shall apply, and/or iii) in accordance with the terms applicable for US Federal Government officers or employees acting as part of their official duties; on a worldwide, perpetual, irrevocable, royalty-free basis to BMJ Publishing Group Ltd ("BMJ") its licensees and where the relevant Journal is co-owned by BMJ to the co-owners of the Journal, to publish the Work in this journal and any other BMJ products and to exploit all rights, as set out in our [licence](#).

The Submitting Author accepts and understands that any supply made under these terms is made by BMJ to the Submitting Author unless you are acting as an employee on behalf of your employer or a postgraduate student of an affiliated institution which is paying any applicable article publishing charge ("APC") for Open Access articles. Where the Submitting Author wishes to make the Work available on an Open Access basis (and intends to pay the relevant APC), the terms of reuse of such Open Access shall be governed by a Creative Commons licence – details of these licences and which [Creative Commons](#) licence will apply to this Work are set out in our licence referred to above.

Other than as permitted in any relevant BMJ Author's Self Archiving Policies, I confirm this Work has not been accepted for publication elsewhere, is not being considered for publication elsewhere and does not duplicate material already published. I confirm all authors consent to publication of this Work and authorise the granting of this licence.

1  
2  
3 **Industry views of the UK Soft Drinks Industry Levy: a thematic analysis of elite interviews**  
4  
5  
6  
7 **with food and drink industry professionals, 2018-20**  
8  
9

10  
11  
12  
13 Dr Catrin P Jones<sup>a\*</sup>, Dr Hannah Forde <sup>a,<</sup>, Dr Tarra L Penney<sup>b</sup>, Dr Dolly Theis <sup>a</sup>, Prof Steven  
14  
15  
16 Cummins<sup>c</sup>, Prof Jean Adams <sup>a</sup>, Dr Cherry Law<sup>d</sup>, Prof Harry Rutter<sup>e</sup>, Prof Rich Smith<sup>f</sup>, Prof  
17  
18  
19  
20 Martin White<sup>a</sup>.  
21  
22

23  
24  
25  
26  
27 a MRC Epidemiology Unit, School of Clinical Medicine, University of Cambridge, United  
28

29  
30 Kingdom  
31

32  
33  
34 b Global Food System and Policy Research, School of Global Health, Faculty of Health,  
35  
36  
37 York University, Canada  
38

39  
40  
41 c Population Health Innovation Lab, Department of Public Health, Environments & Society,  
42  
43  
44 Faculty of Public Health and Policy, London School of Hygiene & Tropical Medicine, United  
45  
46  
47 Kingdom  
48

49  
50  
51 d Department of Agri-Food Economics and Marketing, University of Reading, Reading, UK  
52

53  
54 e Department of Social and Policy Sciences, University of Bath, Bath, UK  
55

56  
57 f Faculty of Health and Life Sciences, University of Exeter, Exeter, UK  
58  
59  
60

1  
2  
3 <Present address: Nuffield Department of Primary Care Health Sciences, University of Oxford, Oxford,  
4  
5  
6 United Kingdom  
7  
8  
9  
10  
11  
12

13 **\*Corresponding Author:** Dr Catrin Pedder Jones, MRC Epidemiology Unit, University of  
14  
15  
16 Cambridge School of Clinical Medicine, Box 285 Institute of Metabolic Science, Cambridge  
17  
18  
19 Biomedical Campus, Cambridge, CB2 0QQ, United Kingdom. [Catrin.jones@mrc-](mailto:Catrin.jones@mrc-epid.cam.ac.uk)  
20  
21  
22 [epid.cam.ac.uk](mailto:Catrin.jones@mrc-epid.cam.ac.uk) +44 (0)1223 769 114  
23  
24  
25

26 **Keywords:** Soft drinks, Soft drinks industry levy, Food and drink industry, sugar sweetened  
27  
28  
29 beverage  
30  
31  
32  
33  
34  
35

36 **Word count:** 6799 (without quotes 5192, with reflexivity section in supplementary file 4915)  
37  
38  
39  
40  
41  
42

### 43 Abstract

44  
45  
46 **Background:** The UK Soft Drinks Industry Levy (SDIL), implemented in 2018, has been  
47  
48  
49 successful in reducing the sugar content, and purchasing, of soft drinks, with limited financial  
50  
51  
52 impact on industry. Understanding the views of food and drink industry professionals  
53  
54  
55 involved in reacting to the SDIL is important for policymaking. However, their perceptions  
56  
57  
58 of the challenges of implementation and strategic responses are unknown.  
59  
60

1  
2  
3  
4 ***Aim:*** To explore how senior food and drink industry professionals viewed the SDIL.  
5  
6

7 ***Methods:*** We undertook a qualitative descriptive study using elite interviews with 14 senior  
8  
9  
10 professionals working in the food and drink industry. Braun and Clarke’s approach to  
11  
12  
13 thematic analysis was used to analyse the data, taking an inductive exploratory and  
14  
15  
16  
17 descriptive approach not informed by prior theory or frameworks.  
18  
19

20 ***Results:*** Five main themes were identified: *(1) A level playing field...for some*, Industry  
21  
22  
23 accepted the SDIL as an attempt to create a level playing field but due to the exclusion of  
24  
25  
26  
27 milk-based drinks, this was viewed as inadequate. *(2) Complex to implement, but no lasting*  
28  
29  
30 *negatives*, The SDIL was complex, expensive and time consuming to implement, with  
31  
32  
33 industry responses dependent on leadership buy-in. *“(3) Why us? – the SDIL unfairly targets*  
34  
35  
36 *the drinks industry”*; soft drinks are an unfair target when other categories also contain high  
37  
38  
39  
40 sugar. *“(4) The consumer is king”*; Consumers were a key focus of the industry response to  
41  
42  
43 this policy. *“(5) The future of the SDIL”*; There appeared to be a wider ripple effect, which  
44  
45  
46  
47 primed industry to prepare for future regulation in support of health and environmental  
48  
49  
50  
51 sustainability.  
52  
53  
54  
55  
56  
57  
58  
59  
60

1  
2  
3  
4 **Conclusions:** Insights from senior food and drink industry professionals illustrate how sugar  
5  
6  
7 sweetened beverage taxes might be successfully implemented and improve understanding of  
8  
9  
10 industry responses to taxes and other food and drink policies.  
11  
12  
13  
14  
15  
16  
17  
18  
19

### 20 **Strengths and Limitations**

- 21  
22  
23 • This qualitative study explored how senior food and drink industry professionals  
24  
25  
26  
27 viewed the SDIL.  
28  
29
- 30  
31 • We undertook elite interviews with 14 professionals working in the food and drink  
32  
33  
34 industry, who have often been difficult to recruit in other studies.  
35  
36
- 37  
38 • Braun and Clarke's thematic analysis taking a descriptive approach was used to  
39  
40  
41 analyse the data.  
42  
43
- 44  
45 • Elite interviewing methods allow for the building of relationships to elicit meaningful  
46  
47  
48 responses from participants.  
49
- 50  
51 • Due to recruitment challenges, interviews were carried out over a long period of time,  
52  
53  
54 meaning participants experienced different political contexts when data was collected.  
55  
56  
57  
58  
59  
60

1  
2  
3  
4  
5  
6  
7  
8  
9  
10  
11  
12  
13  
14  
15  
16  
17  
18  
19  
20  
21  
22  
23  
24  
25  
26  
27  
28  
29  
30  
31  
32  
33  
34  
35  
36  
37  
38  
39  
40  
41  
42  
43  
44  
45  
46  
47  
48  
49  
50  
51  
52  
53  
54  
55  
56  
57  
58  
59  
60

For peer review only



## Introduction

Diet-related non-communicable diseases are a major and growing problem, responsible for over 11 million deaths globally each year [1]. Sugar consumption is of particular concern, with the World Health Organization (WHO) recommending member states introduce sugar-sweetened beverage (SSB) taxes (World Health Organization, 2017). The Soft Drinks Industry Levy (SDIL), announced on 16<sup>th</sup> March 2016 and implemented in the United Kingdom (UK) on 6<sup>th</sup> April 2018, was designed to incentivise manufacturers of SSBs to reformulate their products [3] via charging a levy on soft drinks produced by companies when they leave the warehouse or when imported into the country [4]. Part of the UK Government's Childhood Obesity: A Plan For Action [5], the SDIL consists of two tiers (for particulars of the tax see box 1). The Government published a second chapter of its childhood obesity plan in 2018, which suggested the SDIL may be extended to milk-based drinks, though this has not yet occurred (Department of Health and Social Care, 2018).

### Box 1: Soft Drinks Industry Levy Particulars [3]

#### Eligible drinks:

- $\geq 8$  g total sugar per 100 mL charged at 24 pence per litre

- $\geq 5$  g and  $< 8$  g total sugar per 100 mL charged at 18 pence per litre

Exemptions:

- Drinks containing more than 75% milk or 1.2% alcohol
- Alcohol replacement drinks
- Powdered drinks
- 100% fruit juices

Manufacturers selling under one million litres of drinks per year

The SDIL was one of the first SSB fiscal interventions explicitly designed to incentivise reformulation [3,6]. This aim was largely achieved, substantially reducing overall SSB sugar content, and inducing a major shift of drinks from the higher levy tier to the lower tier and untaxed bracket between 2016 and 2018 (Scarborough et al., 2020). This shift was reflected in purchases of sugar from SSBs, with a 2.7% or 8g reduction in sugar purchased per household per week in soft drinks one year after implementation [7]. Prior to implementation of the SDIL, the food and drinks industry (hereafter referred to as ‘industry’) viewed the SDIL as having a potentially negative impact on profits resulting in job losses [8–10]. A negative stock market reaction to the SDIL announcement was observed, but this only lasted

1  
2  
3 two days [11]. Similarly, a negative impact on company domestic turnover was observed  
4  
5  
6 following the announcement of the SDIL, but this resolved by the time of its implementation  
7  
8  
9  
10 [12].  
11  
12  
13  
14  
15  
16

17 Previous work has investigated industry perspectives of the SDIL expressed through  
18  
19 the news media [8,13–16] and the views of industry, civil society and academic participants  
20  
21 on how marketing changed in response to the SDIL [17]. A notable gap in the literature,  
22  
23 however, is perspectives of the SDIL from the commercial sector, not communicated publicly  
24  
25 through news media nor focused solely on marketing responses. Important learning can be  
26  
27 obtained by exploring the perspectives of commercial actors involved in responding to  
28  
29 regulation. Interviews with senior members of industry can help examine the impact of the  
30  
31 SDIL on both the soft drinks industry and wider food and drink industry, an avenue not  
32  
33 previously explored. This study therefore aimed to address these knowledge gaps and inform  
34  
35 policymaking by exploring the perspectives of senior industry professionals regarding the UK  
36  
37  
38  
39  
40  
41  
42  
43  
44  
45  
46  
47  
48  
49  
50 SDIL.  
51  
52  
53  
54  
55  
56

## 57 **Methods**

58  
59  
60

### *Study Design*

This study adopted a qualitative descriptive design involving elite interviews with senior industry professionals.

### *Methodological Orientation*

This research took an experiential qualitative approach, within a critical realist position. Participant perspectives and perceptions were prized over researcher interpretations, and reality was derived from our participants' words and meaning, rather than a reality constructed through researchers' interpretation of their words [18]. A descriptive approach was used to explore how the SDIL was viewed from the position of our participants.

### *Research Team*

ANONYMISED AUTHORS secured funding for the overall evaluation of the SDIL within which this study formed a part [19]. Interviews were conducted by Postdoctoral Research Associates ANONYMISED AUTHORS. AUTHOR led the design of data collection and AUTHOR led the design of the analysis. AUTHOR & AUTHOR provided guidance on the design of both elements. AUTHOR and AUTHOR recruited and interviewed participants.

1  
2  
3 AUTHOR led the analysis with support from AUTHOR. AUTHOR conducted secondary  
4  
5  
6  
7 coding to support theme generation and interpretation. All authors previously mentioned, as  
8  
9  
10 well as AUTHOR and AUTHOR were involved in data analysis and interpretation, as well as  
11  
12  
13  
14 drafting this manuscript.  
15  
16  
17  
18  
19

### 20 *Reflexivity*

21  
22  
23 Braun and Clarke discuss reflexivity as a fundamental characteristic of thematic analysis,  
24  
25  
26 involving critical reflection of researcher perspectives, and how these will be integrated  
27  
28  
29 within the analysis and interpretation of data [20]. The complete elimination of bias is not  
30  
31  
32 something that can be conducted in qualitative research and more importantly should not be  
33  
34  
35 an aim. Unlike statistical analysis, the researcher is the tool of analysis. The researcher  
36  
37  
38 therefore is an integral part of the analytic process and to conduct qualitative thematic  
39  
40  
41 analysis well, they must develop an understanding of how their own perspectives, position  
42  
43  
44 and view of reality helps illuminate will influence the analysis [20].  
45  
46  
47  
48  
49  
50  
51  
52  
53

54 This study aimed to centre participants' words in a descriptive manner to preserve their  
55  
56  
57 intention. This approach was also chosen due to reflection by the research team on our  
58  
59  
60

1  
2  
3  
4 positionality as public health academics. We aimed to understand industry perspectives  
5  
6  
7 regarding the SDIL; however, it is important to acknowledge that the personal and  
8  
9  
10 professional goals of the research team (authors on this paper) as public health researchers  
11  
12  
13 are likely to be different from those of people working in the food and drink industry.  
14  
15  
16 Therefore, a descriptive approach was selected which prizes participants' words and  
17  
18  
19 perspectives over and above researcher interpretations. Whilst our perspectives have still  
20  
21  
22 influenced the analysis, as they should in good qualitative practice, we sought to put aside our  
23  
24  
25 biases and negativity towards some of the practices of the food and drink industry, to truly  
26  
27  
28 'listen' to the perspectives of our participants. As a result, a modified version of Braun and  
29  
30  
31 Clarke's thematic analysis was used; reflexivity was a priority throughout the analysis in line  
32  
33  
34 with the approach.  
35  
36  
37  
38  
39  
40  
41  
42  
43

44 It is also important to note that, although we have taken a descriptive approach, the results  
45  
46  
47 represent participant perspectives. Whilst the researchers work to put aside their biases which  
48  
49  
50 may lean towards the critical; statements, findings and themes found do not represent an  
51  
52  
53 objective truth, rather the reported perspectives of participants. We urge readers of this work  
54  
55  
56  
57 to use their own critical reflection when interpreting and using these findings.  
58  
59  
60

## *Participants*

Senior professionals from the soft drinks, food and other drinks industries were recruited to this study using purposive and snowball sampling. We adopted 'elite interviewing' methods to maximise involvement of senior professionals in positions of influence within their organisation and with high levels of responsibility [21]. This technique provides a series of strategies to support recruitment of difficult to access key participants, and to ensure the validity and reliability of data [22]. The principles of elite interviewing were used to inform recruitment including the maintenance of trust, gauging the tone of the interview, preparing appropriately for the interview, and engaging in dialogue relevant to each informant [23,24].

Individuals were considered eligible to participate based on the following criteria: a) currently or previously held a high-level industry position (at the managerial, director or chief officer level), b) their organisation and their professional role was directly or indirectly impacted by the SDIL and c) they could provide a novel perspective, not previously heard in our interviews, to ensure a range of views. Recruitment typically involved an email introduction by a member of the team or informant contact, although AUTHOR also attended

1  
2  
3 industry food events and recruited face to face. Initial contact was followed by an informal  
4  
5  
6  
7 telephone conversation with AUTHOR or AUTHOR to discuss the research purpose, team  
8  
9  
10 and informant interests and perspectives, ultimately proceeding to full participation via  
11  
12  
13 telephone interview.  
14  
15  
16  
17  
18  
19

### 20 *Data Collection*

21  
22  
23 Telephone interviews were conducted from June 2018 to June 2020. Participant information  
24  
25  
26 sheets were sent to potential participants prior to participating in the informal discussion.  
27  
28  
29

30 Informed consent was obtained verbally prior to commencement of the formal telephone  
31  
32  
33 interview, which was digitally audio-recorded. Interviews were undertaken using a minimally  
34  
35  
36 structured topic guide containing three broad areas of inquiry: a) Can you tell me about your  
37  
38  
39 role and organization? b) Can you tell me about your sector as a whole? c) What do you  
40  
41  
42  
43 know about the UK Soft Drinks Industry Levy and its impacts? Elite interviewing  
44  
45  
46 necessitates informed and adaptive dialogue [23,25], meaning participants could engage in  
47  
48  
49 ways most relevant to their specific expertise or experiences within these broad areas.  
50  
51  
52  
53

54 Interviews were transcribed verbatim by a trusted external company, and transcripts were  
55  
56  
57  
58  
59  
60



1  
2  
3  
4 checked against the audio files by AUTHOR to identify any inaccuracies. Transcripts were  
5  
6  
7 anonymised prior to analysis by removing names of people, organisations, and brands.  
8  
9  
10  
11  
12

### 13 *Analysis*

14  
15  
16  
17 Analysis commenced once all interviews had been conducted and transcribed. Braun and  
18  
19  
20 Clarke's thematic analysis was used, taking an inductive exploratory and descriptive  
21  
22  
23 approach not informed by any prior theory or framework [26]. This approach is flexible due  
24  
25  
26 to lack of alignment with specific epistemological and ontological stance [27,28]. Six  
27  
28  
29 analytic steps were conducted: 1) familiarisation, 2) data coding, 3) initial theme generation,  
30  
31  
32  
33 4) theme development and review, 5) theme refining, defining and naming, 6) writing up.  
34  
35  
36  
37  
38  
39

40 AUTHOR listened to audio files and read transcripts at least twice to become familiar with  
41  
42  
43 them, whilst making notes on initial impressions and patterns (step 1). Following  
44  
45  
46 familiarisation, AUTHOR worked systematically through the entire data set and conducted  
47  
48  
49 complete coding of all data, in which segments of data were given a label to describe their  
50  
51  
52  
53 area of interest. Coding was supported by NVivo software version 12. Semantic codes were  
54  
55  
56  
57 derived directly from participants' speech or codes where phrases of speech were brief  
58  
59  
60

1  
2  
3  
4 enough to be directly coded (step 2). AUTHOR then sorted these initial codes into concise  
5  
6  
7 categories (overarching codes), which clearly described the content of the data (step 3). A  
8  
9  
10 reflective diary was kept throughout the coding process by AUTHOR to note reflections on  
11  
12  
13 findings and to ensure a data-driven analytic process.  
14  
15  
16  
17  
18  
19

20 AUTHOR also familiarised herself with the transcripts (step 1) and then examined  
21  
22  
23 AUTHOR's coding to ensure the codes were data driven with as little interpretation as  
24  
25  
26 possible (step 2). AUTHOR then collated codes that shared a common pattern into themes  
27  
28  
29 (step 3). Again, AUTHOR and AUTHOR met to discuss and refine the themes to ensure they  
30  
31  
32 were descriptive with minimal interpretation (step 4).  
33  
34  
35  
36  
37  
38  
39

40 A document containing themes, codes within them, and extensive anonymised quotes was  
41  
42  
43 shared with all co-authors in two phases: phase 1 March 2022 and phase 2 October 2022  
44  
45  
46 (step 5). This data clinic aimed to minimise researcher interpretation. A document presented  
47  
48  
49 theme descriptions and asked co-authors to answer the following questions for each theme: 1)  
50  
51  
52 Is the theme descriptive? 2) Does the theme represent the data accurately? 3) What do you  
53  
54  
55 think the theme tells us about the SDIL from the perspective of industry? AUTHORS  
56  
57  
58  
59  
60

1  
2  
3  
4 completed the data clinic document in phase 1. Themes were amended based on their  
5  
6  
7 reflections and the document updated in October 2022. AUTHORS completed the data clinic  
8  
9  
10 form in phase 2. Final themes and the manuscript were written up by AUTHOR and reviewed  
11  
12  
13 by all co-authors (step 6).  
14  
15  
16  
17  
18  
19

### 20 *Patient and Public Involvement Statement*

21  
22  
23 This study is part of the 'Evaluation of the health impacts of the UK Treasury Soft Drinks  
24  
25  
26 Industry Levy (SDIL)' funded by NIHR ([award no. 16/130/01](#)). Project oversight is provided  
27  
28  
29 by an independent study steering committee which contains members of the public.  
30  
31  
32  
33  
34  
35  
36

### 37 **Results**

38  
39  
40 Fourteen participants were recruited (Table 1). Participants' roles within organisations were  
41  
42  
43 diverse; chief officers, directors, and managers with overall responsibility or with specialist  
44  
45  
46 responsibilities for finance, strategy, operations, marketing, public relations or nutrition.  
47  
48  
49

50 Interviews ranged in length from 26 to 62 minutes. Six additional participants were  
51  
52  
53 approached and took part in informal discussions; three did not participate due to scheduling  
54  
55  
56  
57  
58  
59  
60

1  
2  
3 issues, and three refused to take part. Five inductively derived, interlinked themes and 15  
4  
5  
6  
7 subthemes were identified (Box 2).  
8  
9  
10  
11  
12  
13

14 Table 1: Participant details  
15

| Sector Category                           | N |
|-------------------------------------------|---|
| Drink manufacturers                       | 4 |
| Food and drink manufacturers              | 3 |
| Supermarkets                              | 3 |
| Industry associations                     | 1 |
| Out-of-home* food and drink manufacturers | 1 |
| Out-of-home retailers                     | 1 |
| Advertising consultants                   | 1 |

16  
17  
18  
19  
20  
21  
22  
23  
24  
25  
26  
27  
28  
29  
30  
31  
32  
33  
34  
35  
36  
37  
38  
39  
40  
41  
42  
43  
44 \*\* *“The out-of-home sector is generally considered to be any outlet where food or drink is prepared in a way  
45 that means it is ready for immediate consumption, on or off the premises”*[29]  
46  
47  
48  
49  
50  
51  
52  
53  
54  
55  
56  
57  
58  
59  
60

## Box 2: Theme and sub-theme summary.

Theme 1: A level playing field...for some

*The SDIL created a level playing field*

*Milk-based drinks increased the complexity in the out-of-home sector*

*Challenges for supermarkets with large product portfolios*

Theme 2: Complex to implement but no lasting negative effects

*Complexities in strategic response – price and product are key*

*Global companies and internal systems*

*Contradictory government messaging*

*Leadership buy-in dictates strategic response*

*Few long-lasting negative effects & SDIL provided opportunities*

Theme 3: Why us? – The SDIL unfairly targets the drinks industry

*Sugary drinks in isolation were unfair targets for regulation*

*Distrust of government's motivations to introduce the SDIL*

Theme 4: Consumer is king

*Consumer response to product changes resulting from the SDIL*

*Consumer momentum towards healthier products*

Theme 5: The future of the SDIL

*Extending to milk and fruit-based drinks*

*Impact on the wider food and drink industry and on other sectors*

*Proposal to reverse the SDIL*

1  
2  
3  
4  
5  
6  
7  
8  
9  
10  
11  
12  
13  
14  
15  
16  
17  
18  
19  
20  
21  
22  
23  
24  
25  
26  
27  
28  
29  
30  
31  
32  
33  
34  
35  
36  
37 ***Theme 1: A level playing field...for some***  
38

39  
40 ***The SDIL created a level playing field***  
41

42  
43 Industry professionals accepted that the SDIL helped create a level playing field, where no  
44  
45  
46  
47 organisation lost out by taking action on health that their competitors did not. Soft drinks  
48  
49  
50 manufacturers also discussed that the two years to prepare for the implementation of the  
51  
52  
53 SDIL was sufficient and they were happy they could develop an adequate response within  
54  
55  
56  
57 that time.  
58  
59  
60

1  
2  
3  
4  
5  
6  
7 *“... legislation level playing fields is so important and that’s why with these big public health*  
8  
9  
10 *initiatives...I’m actually really quite pro government intervention” – Supermarket*  
11  
12

13  
14  
15  
16  
17 *“We need to create an even playing field, I mean so therefore we need a government to say*  
18  
19  
20 *this is the rule and it’s all going to affect you evenly, now go and do your thing.”-*  
21  
22

23 *Advertising consultant*  
24  
25

26  
27  
28  
29  
30 *“I’m not aware of any significant implementation or challenges that our members have*  
31  
32  
33 *encountered, I mean they did have time to adapt, the legislation was published in good time*  
34  
35  
36  
37 *to allow them to understand exactly what they would be required to do” – Trade association*  
38  
39  
40  
41  
42  
43

44 However, participants also stated that a lack of understanding and consultation from  
45  
46  
47 government meant a ‘true’ level playing field for all sectors involved in the sales of sugary  
48  
49  
50 drinks had not been not achieved. The lack of consultation by the government with sectors  
51  
52  
53 who were not soft drinks manufacturers and the exclusion of milk-based sugary drinks led to  
54  
55  
56  
57 this perception.  
58  
59  
60

1  
2  
3  
4  
5  
6  
7 *“If you’re going to do something like this you want to really do it smartly so everybody feels*  
8  
9  
10 *they’re 100% equally affected and you don’t get this interpretations and this ‘my product is in*  
11  
12  
13 *scope, your product is out of scope’...it doesn’t create the sense of unilateral ‘let’s do this’,*  
14  
15  
16  
17 *you know, which is what it should be, if that makes sense” – Food and drink manufacturer*  
18  
19

20  
21  
22  
23  
24 *“and then even within the levy itself, you know, we saw that milk-based drinks often carried*  
25  
26  
27 *bigger serving sizes and had more total sugar in them than any of our products would. They*  
28  
29  
30 *were excluded from the levy as well which looked like a big shortcoming.” Drink*  
31  
32  
33 *manufacturer*  
34  
35

#### 36 37 38 39 40 ***Milk-based drinks increased the complexity in the out-of-home sector***

41  
42  
43  
44 Interviewees explained that the government did not think clearly about the technical  
45  
46  
47 implications for retailers and out-of-home sector and that it was easier for soft drink  
48  
49  
50 manufacturers to respond to the levy than it was for other industry actors. A high level of  
51  
52  
53 complexity within the out-of-home sector to manufacture and produce drinks for immediate  
54  
55  
56  
57 consumption led to higher implementation costs; specifically, the exclusion of milk-based  
58  
59  
60



1  
2  
3  
4 drinks and specification around eligibility of drinks mixed with carbon dioxide, water and  
5  
6  
7 ice, and those with and without milk.  
8  
9

10  
11  
12  
13  
14 *“...I don’t think they understood the ways of working and the preparation methods in the out-*  
15  
16  
17 *of-home sector...they were looking at the likes of drinks fountains for carbonated soft drinks*  
18  
19  
20 *because... you would have them coming through a bag and box syrup, they would be mixed*  
21  
22  
23 *with ice or carbon dioxide to give the carbonation or either they could be mixed with water*  
24  
25  
26 *and that would capture those drinks in the out-of-home sector, but there was a vagueness to*  
27  
28  
29 *milk-based drinks” – Out-of-home food and drink manufacturer*  
30  
31  
32  
33  
34  
35  
36

37 Thus, the out-of-home sector had to interpret the legislation themselves and apply the SDIL  
38  
39  
40 according to their interpretation, as queries to Her Majesty’s Revenue and Customs (HMRC  
41  
42  
43 – the tax collecting authority in the UK) went unanswered. The out-of-home sector did not  
44  
45  
46  
47 perceive two years as enough time to have prepared due to confusion surrounding eligibility.  
48  
49

50 In contrast, soft drinks manufacturers stated they had had time to prepare.  
51  
52  
53  
54  
55  
56

57 ***Challenges for supermarkets with large product portfolios***  
58  
59  
60

1  
2  
3  
4 Supermarkets felt disadvantaged compared to soft drink manufacturers by the complexities of  
5  
6  
7 their sector. They highlighted sector-specific challenges to adapting to the SDIL, including  
8  
9  
10 that their product portfolio not only contains branded drinks, about which they have to make  
11  
12  
13 decisions, but also private label (own brand) drinks. It was described as challenging and time  
14  
15  
16 consuming to manage such a large portfolio and make decisions on each product. Retailers  
17  
18  
19 also felt that they were disadvantaged as their customers expressed confusion at differing  
20  
21  
22 responses by different brands – e.g. ‘sugary’ drinks reformulated to just below the SDIL  
23  
24  
25 threshold but containing both sugar and sweeteners confused customers, with queries directed  
26  
27  
28 at retailers rather than drinks manufacturers.  
29  
30  
31  
32  
33  
34  
35  
36

37 *“...what branded suppliers chose to do was their choice...different brands choosing to*  
38  
39  
40 *reformulate, resize or inflate, which I think led to a fair bit of customer confusion as to what*  
41  
42  
43 *the hell was going on.” – Supermarket*  
44  
45  
46  
47  
48  
49

50 *“... we tried to make it as clear for customers by putting on all the [shelves] sugar levy*  
51  
52  
53 *applied, so they could very much see...But...when they see a sugar line that’s not [included*  
54  
55  
56 *in the SDIL], that’s when the questions start coming.” – Supermarket*  
57  
58  
59  
60

1  
2  
3  
4  
5  
6  
7 *Theme 2: Complex to implement but no lasting negative effects*  
8  
9

10 *Complexities in strategic response – price and product are key*  
11  
12

13 Industry responded to the SDIL by reviewing product portfolios and strategically selecting  
14 responses at the individual product level. This portfolio review approach is why responses  
15 differed between companies and between products. Research and development (R&D) and  
16 consumer testing were costly for industry during this process, and, linking to theme 1, there  
17 were increased costs for those companies with larger product portfolios (e.g. supermarkets).  
18  
19 For the out-of-home sector, additional complications were noted due to confusion over  
20 eligibility of some milk-based drinks.  
21  
22  
23  
24  
25  
26  
27  
28  
29  
30  
31  
32  
33  
34  
35  
36  
37  
38  
39  
40  
41  
42  
43  
44  
45  
46  
47  
48  
49  
50  
51  
52  
53  
54  
55  
56  
57  
58  
59  
60

“...government is very keen to always say “oh just reformulate, it will be easy” but it’s not  
easy. It actually takes a lot of time and investment, which isn’t necessarily something that all  
companies have the resources to do.” – Drink manufacturer

Consumer testing was vital during the reformulation and decision-making process and  
consumer preference dictated the strategy taken. An additional challenge in reformulating

1  
2  
3  
4 drinks described by manufacturers was that sugar serves a functional purpose, in the  
5  
6  
7 mouthfeel of drinks mixed with ice and to prevent ‘brain freeze’, as well as to provide  
8  
9  
10 sweetness.  
11  
12  
13  
14  
15  
16

17 *“... we invested a significant amount of money then actually in developing lots and lots of*  
18  
19  
20 *different formulations with lower sugar to see and testing them with consumers in Great*  
21  
22  
23 *Britain to see whether those recipes, those new recipes would be acceptable to consumers.” –*  
24  
25  
26  
27 *Drink manufacturer*  
28  
29  
30  
31  
32  
33

34 *“Because, actually, yes, we could stick sweeteners in everything, but, actually, sugar also has*  
35  
36  
37 *like a functional role” – Out-of-home retailer*  
38  
39  
40  
41  
42  
43

44 Packaging, merchandising and placement were challenges to overcome, particularly for  
45  
46  
47 supermarkets. Decisions were made on own brand products but also on how to retail other  
48  
49  
50 branded products with different responses to the SDIL (e.g. reformulated drinks, reduced and  
51  
52  
53 increased portion sizes, rebranding).  
54  
55  
56  
57  
58  
59  
60

1  
2  
3  
4 *"...there were a number of products that didn't reformulate but did drop size. So, again,*  
5  
6  
7 *there's just small considerations in that around how you merchandise it, on shelf all our*  
8  
9  
10 *products are measured and then the shelf layout is essentially structured around the size of*  
11  
12  
13 *these products... So what sounds like a relatively simple change, of dropping from 330ml to,*  
14  
15  
16 *I don't know, 250ml, in reality kind of that complexity flows back through the value chain" –*  
17  
18  
19  
20 *Supermarket*  
21  
22  
23  
24  
25  
26

### ***Leadership buy-in dictates strategic response***

27  
28  
29  
30 Leadership buy-in to health within a company was discussed as vital in dictating the strategic  
31  
32  
33 response to the SDIL. Participants described this buy-in as making the process simpler and a  
34  
35  
36 lack of buy-in as a barrier to making timely progress.  
37  
38  
39  
40  
41  
42  
43

44 *"... I think such a review requires strong leadership and ... our COO was very clear that we*  
45  
46  
47 *needed to step in and we needed to do, you know, do the responsible, brave thing." -Drink*  
48  
49  
50 *manufacturer*  
51  
52  
53  
54  
55  
56  
57  
58  
59  
60

1  
2  
3  
4 *"There are parts of the business that were like "we've always produced sugary drinks and we*  
5  
6  
7 *should continue to produce sugary drinks" and I guess you'll get that from any organisation*  
8  
9  
10 *but having that strong leadership and, you know, complete buy-in from the top team and*  
11  
12  
13 *actually pretty much all the other levels of the organisation, then it's actually quite simple" –*

14  
15  
16  
17 *Drink manufacturer*  
18  
19  
20  
21  
22

### 23 *Global companies and internal systems*

24  
25  
26  
27 The cost of setting up internal systems to account for and pay the SDIL was expensive, due to  
28  
29  
30 the requirement to report to HMRC, regardless of whether or not a company involved in the  
31  
32  
33 manufacture or selling of soft drinks was liable to pay the levy. The global nature of many of  
34  
35  
36 these companies was an additional challenge. Response strategies appropriate for a UK  
37  
38  
39 market may not be transferable to other countries, for example reformulation recipes vary due  
40  
41  
42 to differences in consumer palate and storage temperatures/facilities.  
43  
44  
45  
46  
47  
48  
49

50 *"...It's ridiculous that, you know, it's cost us half a million pounds just to tell Treasury that*  
51  
52  
53 *actually we don't need to pay it. I mean it's ludicrous really. It doesn't make any sense."* –

54  
55  
56  
57 *Drink manufacturer*  
58  
59  
60

1  
2  
3  
4  
5  
6  
7 *“We want the system to be able to recognise this product has sugar tax applied to it, this is*  
8  
9  
10 *the rate and this is the finished goods litre in terms of that product that you need to apply that*  
11  
12  
13 *rate to. But, of course, that’s for the UK, and then Ireland have a separate system, France*  
14  
15  
16  
17 *have a separate system, Mexico have a separate system. “ – Food and drink manufacturer*  
18  
19  
20  
21  
22

### ***Contradictory government messaging***

23  
24  
25  
26  
27 There was confusion over the aim of the SDIL and contradictory government messaging;

28  
29  
30 whether manufacturers needed to pass on price increases to change consumer behaviour.

31  
32  
33 Participants indicated that they thought price increases should have been passed on to target

34  
35  
36 individual behaviour change; however, manufacturers stated they had no control over

37  
38  
39 whether this occurred as retailers set the price for consumers.  
40  
41  
42  
43  
44  
45  
46

47 *“...[the] government had slightly mixed messages so it was pretty clear from the Department*

48  
49  
50 *of Health and PHE [Public Health England] and, for example, back-benchers like the Health*

51  
52  
53 *Select Committee... that they expected to see prices passed on ... I think the Treasury were*

54  
55  
56  
57 *trying to say, oh soft drinks manufacturers don’t have to pass this on, you know, they could*  
58  
59  
60

1  
2  
3  
4 *absorb it if they wanted to. Well, apart from the fact that most businesses won't absorb a cost*  
5  
6  
7 *if they can avoid it for obvious reasons, it was the opposite of what the Health Department*  
8  
9  
10 *and others wanted..." – Drink manufacturer*  
11  
12  
13  
14  
15  
16

### ***Few long-lasting negative effects & SDIL provided opportunities***

17  
18  
19  
20 Participants acknowledged that the SDIL did achieve its aim in stimulating product  
21  
22  
23 reformulation to avoid the levy. Although implementation was complex and costly, as  
24  
25  
26 previously illustrated, there were few long-lasting negative effects. Some participants  
27  
28  
29 suggested the SDIL provided opportunities. However, participants were sceptical that the  
30  
31  
32  
33  
34 SDIL would achieve intended reductions in childhood obesity in the UK.  
35  
36  
37  
38  
39

40  
41 *"we... question why a tax on... on a very small number of sugar containing products that are*  
42  
43  
44 *consumed by either adults or children, why it was thought that that would be a, that policy in*  
45  
46  
47 *isolation would be sufficient to reduce obesity rates." – Drink manufacturer*  
48  
49  
50  
51  
52  
53  
54  
55  
56  
57  
58  
59  
60



1  
2  
3  
4 *“... but certainly from our perspective we didn’t see volume decline as a result of this, that*  
5  
6  
7 *would have been... So you could argue it’s positive fiscal policy from that perspective on it,*  
8  
9  
10 *yeah.” – Food and drink manufacturer*

11  
12  
13  
14  
15  
16  
17 *“I think some of them would have switched back but we’ve gained new consumers as well*  
18  
19  
20 *which is, you know, how we, which through sampling and advertising essentially.” – Drink*  
21  
22  
23 *manufacturer*

### 30 ***Theme 3: Why us? – The SDIL unfairly targets the drinks industry***

#### 33 ***Sugary drinks in isolation were unfair targets for regulation***

34  
35  
36  
37 Participants felt that the SDIL unfairly targets the soft drinks industry. Participants expressed  
38  
39  
40 their frustration that a single food category was targeted when other food categories bear a  
41  
42  
43 significant proportion of the responsibility for childhood obesity. They expressed the view  
44  
45  
46 that multiple nutrients or calories across many food and drink sectors should be targeted by  
47  
48  
49 regulation if the government is serious about reducing childhood obesity, particularly as  
50  
51  
52 substitution to other non-regulated food categories could negate the impact of the SDIL on  
53  
54  
55  
56  
57 health.  
58  
59  
60

1  
2  
3  
4  
5  
6  
7 *"I think one of the other questions that wasn't answered at the very beginning was why would*  
8  
9  
10 *it be just the soft drink levy, why would you not target cakes and biscuits...that's what we*  
11  
12  
13 *didn't understand at the time." - Food and drink manufacturer*  
14  
15

16  
17  
18  
19  
20 There was consensus among participants that it didn't make sense for the government to  
21  
22  
23 target a category that they considered was already reducing sugar faster than other food  
24  
25  
26 categories. Although the SDIL had accelerated the reformulation progress for some, this was  
27  
28  
29 stated to be the existing direction of travel. Participants expressed the view that the sector had  
30  
31  
32 been unfairly penalised, and that sectors which reformulate should be praised rather than  
33  
34  
35 targeted by regulation when other unregulated categories have contributed little towards  
36  
37  
38 achieving health goals.  
39  
40  
41  
42  
43  
44  
45  
46

47 *"... the soft drinks category was already well embarked on the journey to*  
48  
49  
50 *reformulation...part of the industry's disappointment and frustration about the announcement*  
51  
52  
53 *of the levy was that they were already absolutely going to deliver what the levy has now kind*  
54  
55  
56 *of made them deliver" – Trade association*  
57  
58  
59  
60

1  
2  
3  
4  
5  
6  
7 ***Distrust of government's motivations to introduce the SDIL***  
8  
9

10 Participants stated that the SDIL was politically motivated, not an evidence-based policy.  
11

12  
13 Government policies targeting obesity were described as contradictory and not aligned with  
14  
15  
16  
17 one another, particularly the proposed ban on advertising of less healthy foods on TV and  
18  
19  
20 online [30]. According to participants, the advertising ban does not distinguish between  
21  
22  
23 reformulated and non-reformulated products, and acts as a disincentive to spending on  
24  
25  
26 reformulation if they cannot recoup their investment through advertising new products.  
27  
28  
29  
30  
31  
32

33  
34 *“So if you can take something from 40g of sugar to 20g of sugar but you'd only advertise on*  
35  
36  
37 *TV is it's 5(g), then why bother, right, and it also means that they can't tell the world, look at*  
38  
39  
40 *this amazing thing we've done, we've reformulated this, you know” – Advertising consultant*  
41  
42  
43  
44  
45  
46

47 Perceived disconnectedness between policies led to distrust in the government and a belief  
48  
49  
50 that government obesity policy is poorly planned. Distrust was compounded by some  
51  
52  
53 companies appearing to be successful at lobbying the government following the  
54  
55  
56 announcement, resulting in changes to the regulations as a result of this lobbying, rather than  
57  
58  
59  
60

1  
2  
3  
4 on the basis of health or nutrition, in particular the decision to exclude milk-based drinks.  
5  
6

7 Participants stated this was motivated by some companies being able to gain a competitive  
8  
9  
10 advantage, as some milk-based drinks have higher sugar content than soft drinks. Participants  
11  
12  
13 also referred to the SDIL as a political tool to distract from other things in the budget in  
14  
15  
16 which it was announced. The fact that the proposal to establish the SDIL had been kept  
17  
18  
19 secret, and the announcement was a shock to many, led to this view.  
20  
21  
22  
23  
24  
25  
26

27 *"... I think this was a decision taken within the Treasury by quite a small group of people and*  
28  
29  
30 *it was announced during a Budget by a Chancellor who was trying to distract from some*  
31  
32  
33 *other economic figures that he maybe wasn't too pleased about."* – Drink manufacturer  
34  
35  
36  
37  
38  
39

40 *"I think the timing was a surprise... Yeah and the way it was done without any form of*  
41  
42  
43 *consultation or pre-announcement."* – Drink manufacturer  
44  
45  
46  
47  
48  
49

#### 50 ***Theme 4: Consumer is king***

#### 51 52 53 ***Consumer response to product changes resulting from the SDIL*** 54 55 56 57 58 59 60

1  
2  
3  
4 Industry participants discussed throughout all previous themes that meeting the wishes of  
5  
6  
7 consumers was the priority when responding to the SDIL. Taste preferences and tolerance of  
8  
9  
10 reformulation changes were critical and companies expressed concerns that consumers might  
11  
12  
13 dislike reformulated products if they changed dramatically in a short time period. Company  
14  
15  
16 responses to the SDIL, as well as health and environmental issues more broadly, were vital to  
17  
18  
19 maintaining brand loyalty and company reputation in the eyes of consumers. The media were  
20  
21  
22 seen as influential in shaping consumer preferences and company reputation, as some  
23  
24  
25 newspapers had used graphics to show the sugar content of drinks and this was considered to  
26  
27  
28 have influenced purchasing patterns. A small group of very loyal consumers can cause a  
29  
30  
31 backlash publicly, which can be picked up by both the news media and social media.  
32  
33  
34  
35  
36  
37  
38  
39  
40  
41

42 *"... obviously what's critical from our perspective is developing a product that consumers*  
43 *still like the taste of whilst reducing their sugar intake so that we were trying to marry-up*  
44 *those two things." – Drink manufacturer*  
45  
46  
47  
48  
49  
50  
51  
52  
53

54 *"I think the overall ethos is that you know we can make foods that little bit healthier, we can*  
55 *produce healthier foods but if they don't taste good the consumer isn't going to consume*  
56  
57  
58  
59  
60

1  
2  
3  
4 *them, they're not going to repeat purchase them so we really do believe that bringing the two*  
5  
6  
7 *together is a real winning space and is where consumers' heads are at." – Out-of-home food*  
8  
9  
10 *and drink manufacturer*

### ***Consumer momentum towards healthier products***

11  
12  
13  
14  
15  
16  
17  
18  
19  
20 Participants stated consumer purchasing patterns are changing, with consumers increasingly  
21  
22  
23 choosing lower sugar products, which may also have driven reformulation prior to the SDIL.  
24  
25  
26  
27 The policy acted as a catalyst for increasing consumer demand for sugar reduction and some  
28  
29  
30 respondents also highlighted the role of social media in driving these trends. Consumers were  
31  
32  
33 also reported by participants as "moving away from" artificial ingredients, which leads to  
34  
35  
36 challenges in reformulation using non-nutritive sweeteners. Some participants suggested that  
37  
38  
39 consumers were not lost when sugar was reduced in their favourite products, due to consumer  
40  
41  
42 preferences moving towards prioritising health. It was important to participants and their  
43  
44  
45 organisations that consumers have enough choice and there were concerns that regulation  
46  
47  
48 could limit choice from some.  
49  
50  
51  
52  
53  
54  
55  
56  
57  
58  
59  
60

1  
2  
3  
4 *"...consumer research that we did which proved that consumers are moving away from*  
5  
6  
7 *sugary drinks, they still want sweet, great-tasting drinks but they just don't want the sugar*  
8  
9  
10 *and the calories" – Drink manufacturer*

11  
12  
13  
14  
15  
16  
17 *"A lot of our consumers like ..., , they don't want to have sweeteners, they don't want to have*  
18  
19  
20 *preservatives" – Drink manufacturer*

#### 21 22 23 24 25 26 27 ***Theme 5: The future of the SDIL***

28  
29  
30 Participants discussed the potential of expanding the SDIL to fruit and milk-based drinks, the  
31  
32  
33 wider threat to other products, reformulation in other categories, changes in other sectors as a  
34  
35  
36 result of the SDIL and the possibility of its reversal by government.  
37  
38  
39  
40  
41  
42  
43

#### 44 ***Extending to milk and fruit-based drinks***

45  
46  
47 Concerns were expressed over the Chancellor's proposal to extend the SDIL to milk-based  
48  
49  
50 and fruit-based drinks at the time of the announcement. Participants stated the nutritional  
51  
52  
53 benefits of these meant that natural sugars (fructose and lactose) should not be subject to the  
54  
55  
56 same regulation as soft drinks. The vitamin and mineral content of these drinks was also  
57  
58  
59  
60

1  
2  
3 discussed as a benefit to children who may not be consuming sufficient fruit, vegetables or  
4  
5  
6  
7 calcium from other sources. Reformulation of these drinks was considered particularly  
8  
9  
10 challenging, as naturally occurring sugars cannot be removed in the same way as added  
11  
12  
13 sugars in soft drinks.  
14  
15  
16  
17  
18  
19

20 *"I don't think politicians think it's done. Obviously we've got the review next year on*  
21  
22  
23 *whether milk-based drinks should be included, and then I think it's 2021 when they'll review*  
24  
25  
26 *the levels as well." – Drink manufacturer*  
27  
28  
29  
30  
31  
32

33  
34 *"... Now you have products that are being developed with high levels of sugar in them so that*  
35  
36  
37 *really does need to be addressed but you don't want to go down the route of demonising milk*  
38  
39  
40 *because it is still a great source of nutrition." – Out-of-home food and drink manufacturer*  
41  
42  
43  
44  
45  
46

#### 47 ***Impact on the wider food and drink industry and in other sectors***

48  
49

50 A wider threat to other products, particularly those included in the PHE Sugar Reduction  
51  
52  
53 Strategy [31] (another element of the Childhood Obesity Plan that encouraged voluntary  
54  
55  
56 industry reformulation) was discussed. The SDIL demonstrated that the government was  
57  
58  
59  
60



1  
2  
3  
4 willing to implement policy to regulate the food industry in a way that has not been done  
5  
6  
7 before. Food and drink companies discussed their companies' attempts to reformulate  
8  
9  
10 products not included in the SDIL. The SDIL was described as a rallying call for industry to  
11  
12  
13 improve the healthfulness of products. It was also perceived to cause a ripple effect not just  
14  
15  
16 regarding health but also sustainability, environment, media and promotions.  
17  
18  
19  
20  
21  
22

23  
24 *"Yeah, I think there is a ripple effect. So, I think it can be both positive and negative. I think*  
25  
26  
27 *in terms of positive, I think it can force companies to reformulate and be more innovative in*  
28  
29  
30 *driving the use of other ways of sweetening products" - Food and drink manufacturer*  
31  
32  
33  
34  
35  
36

37 *"I think the social justice piece is only going to get louder and I think that's probably an*  
38  
39  
40 *opportunity for the environment and public health " - Supermarket*  
41  
42  
43  
44  
45  
46

#### 47 ***Proposal to reverse the SDIL***

48  
49

50 Comments made by Boris Johnson in his leadership campaign to become prime minister  
51  
52  
53 (July 2019), suggesting he might consider repealing the SDIL, were not taken well by some  
54  
55  
56  
57  
58  
59  
60

1  
2  
3 participants; who indicated that companies had invested heavily in implementing the levy.  
4  
5

6  
7 However, some participants suggested that reversing the SDIL would be well tolerated.  
8  
9

10  
11  
12  
13 *"If it was removed... we'd still be doing what we're doing and we'd still be aiming to keep*  
14  
15  
16 *the sugar low...if it is removed we're not going to change our core brand back, you know,*  
17  
18 *they're staying where they're staying." – Drinks manufacturer*  
19  
20  
21  
22

23  
24  
25  
26  
27 *"I think, yeah, the industry would be happy to see the back of it because it's just*  
28  
29  
30 *cumbersome, it's just something, it's just another thing to administer." - Food and drink*  
31  
32  
33 *manufacturer*  
34  
35

36  
37  
38  
39  
40 *"I suppose it does feel like a backtrack [reversing the SDIL]. Like we've made all this work*  
41  
42  
43 *and it was at the time quite painful in the sense of it was such a massive change through the*  
44  
45  
46 *supply chain so there was so many things to think about" – Out-of-home food and drink*  
47  
48  
49  
50 *manufacturer*  
51  
52

## 53 54 55 56 57 **Discussion** 58 59 60

## ***Summary***

Senior industry perspectives on the SDIL are described in five main themes. Theme 1: *A level playing field...for some*, Theme 2: *Complex to implement, but no lasting negatives*, Theme 3: *Why us? – the SDIL unfairly targets the drinks industry*, Theme 4: *The consumer is king*, and Theme 5: *The future of the SDIL*. The SDIL appeared to create a level playing field which industry accepted, however, this was perceived as inadequate due to the exclusion of milk-based drinks and targeting only SSBs, giving some a competitive advantage. Implementation of the SDIL was time consuming and complex, leading to high financial investment to prepare for it. Strategic response to the SDIL was dependent on leadership buy-in and particularly governed by potential consumer responses to product changes associated with the policy. The announcement and subsequent implementation of the SDIL caused a ripple effect beyond the soft drinks industry. The wider food and drink industry perceived it as evidence of the government being willing to regulate to help achieve health goals.

## ***Strengths and limitations***

Strengths include the use of elite interviewing techniques to build relationships with and solicit meaningful responses from participants. These techniques allowed us to obtain the

1  
2  
3 views of senior professionals from commercial organisations who have often been difficult to  
4  
5  
6 recruit to other studies [32]. As evident from the challenges described in the out-of-home  
7  
8  
9 sector and supermarkets, including respondents outside of manufacturing allowed wider  
10  
11  
12 exploration of the systemic impacts of the SDIL. A limitation of this work, however, is that  
13  
14  
15 interviews were carried out over a long period of time due to challenges in recruitment.  
16  
17  
18 Therefore, not all participants experienced the same political context, such as Boris Johnson's  
19  
20  
21 threats to reverse the SDIL in July 2019.  
22  
23  
24

25  
26  
27 A descriptive approach was taken and emphasised throughout, including through our  
28  
29  
30 use of independent double coding and interpretation checked by researchers not directly  
31  
32  
33 involved in the initial analysis, to ensure that participant perspectives were represented  
34  
35  
36 accurately and neutrally in theme generation and commentary. Adopting a descriptive  
37  
38  
39 approach could, however, also be viewed as a limitation of this work. Participants were  
40  
41  
42 recruited based on the condition that their responses were anonymous and the researchers  
43  
44  
45 were adopting a position of neutrality. Therefore, it would be unethical to pursue more  
46  
47  
48 interpretive analyses of these responses. There is, however, overlap between some of the  
49  
50  
51 responses provided by participants in this work to the 'typical' responses explored by other  
52  
53  
54 researchers as an industry 'playbook' [33]. Although it was not the aim of the work to  
55  
56  
57  
58  
59  
60

1  
2  
3  
4 explore participant responses in relation to the commercial determinants of health, it is  
5  
6  
7 possible that participant responses were censored and did not represent the reality of what  
8  
9  
10 occurred behind the scenes in the food and drink industry in relation to the SDIL. Further,  
11  
12  
13 although researcher neutrality was expressed to participants during recruitment and data  
14  
15  
16 collection, the position of interviewers AUTHOR and AUTHOR as public health academics  
17  
18  
19 could also have led to participants censoring their responses.  
20  
21  
22  
23  
24  
25  
26

### 27 *Relationship to prior knowledge*

28  
29  
30 Our findings indicate that the UK soft drinks industry was reformulating products to  
31  
32  
33 lower sugar alternatives several years before the SDIL was introduced. The direction of travel  
34  
35  
36 was towards healthier drinks as the primary offer for consumers, with the SDIL accelerating  
37  
38  
39 the pace of change. This finding is consistent with previous qualitative and quantitative  
40  
41  
42 findings [17,34]. Suggestions by our participants of the possibility of consumers substituting  
43  
44  
45 other product categories such as confectionary for SSBs, however, have not been born out in  
46  
47  
48 quantitative analyses (Rogers et al., 2022).  
49  
50  
51  
52  
53

54 Consumer preferences for healthier products, and our finding that industry prioritises  
55  
56  
57 these health preferences in their decision making, are likely to have triggered the soft drinks  
58  
59  
60

1  
2  
3  
4 industry to reformulate products prior to the announcement of the SDIL. The advocacy (e.g.  
5  
6  
7 Jamie Oliver and Action on Sugar) in the early 2010s and government threats to regulate  
8  
9  
10 industry [35] may have also increased consumer awareness about the health impact of sugar  
11  
12  
13 consumption and had a ‘signalling effect’ to consumers to reduce their sugar consumption  
14  
15  
16  
17 [36].  
18  
19

20  
21 Participants in our study suggested that the SDIL was adopted by the Government  
22  
23 because of the existing popularity of sugar reduction among the public. It is likely that the  
24  
25  
26 UK public was aware that SSBs harm health much earlier than the policy announcement,  
27  
28  
29 resulting from media activity, such as that related to Jamie Oliver’s campaigning [37], PHE’s  
30  
31  
32  
33 [38] and WHO’s reports on sugar[39].  
34  
35  
36

37  
38 Participants also discussed adopting a portfolio review approach, where each product  
39  
40 would be assessed individually, when determining their response to the SDIL, which aligns  
41  
42  
43 with previous findings that soft drink companies monitor their internal and external contexts,  
44  
45  
46 to determine their products’ market position in response to a stimulus such as the SDIL, and  
47  
48  
49 then respond with marketing or non-marketing activity to influence the purchasing of soft  
50  
51  
52  
53 drinks [17].  
54  
55  
56  
57  
58  
59  
60

### *Interpretation and implications for policy and practice*

Participants expressed concern that policies introduced to combat obesity and other societal issues should be complementary not contradictory. The proposed ban on TV and online advertising of high fat, salt and sugar (HFSS) products by the UK Government [40] was viewed by industry to be misguided as they stated it may stop them being able to advertise their reformulated products; not just those impacted by the SDIL but products voluntarily reformulated which would still be classified as HFSS. Stakeholder requests for consistency across policy areas was also expressed by interviewees regarding this advertising ban [32]. This indicates that a more consistent approach to determining which products government wants industry to change would help ensure policies do not undermine one another and build trust in government amongst industry.

Interviewees reported that the technical aspects of drink production, particularly in the out-of-home sector, were not adequately accounted for in the design of the SDIL. An unintended consequence of the milk-based drink exclusion, led to some organisations having to interpret the particulars of the SDIL whilst their queries to HMRC went unanswered. Experiences of participants in this work align with findings that UK Government policy is set up poorly for the purposes of adequate monitoring and evaluation (D. R. Z. Theis & White,

1  
2  
3 2021). Future policy should engage with the wider food and beverage sector once a policy is  
4  
5  
6  
7 certain to be implemented, to design and communicate technicalities in ways that avoid  
8  
9  
10 industry having to interpret themselves what is required and provide timely responses to  
11  
12  
13 queries surrounding implementation.  
14  
15  
16  
17  
18  
19

### 20 *Unanswered questions and future research*

21  
22  
23 Respondents indicated that lobbying regarding the exclusion of milk-based drinks  
24  
25  
26 from the SDIL had been successful. A further avenue for research would be to understand in  
27  
28  
29 more detail the access the food and drink industry had to government during the policy  
30  
31  
32 making process, and to explore why some of these attempts to influence policy were  
33  
34  
35 successful and others not. While this research focused on the SDIL, it would be interesting to  
36  
37  
38 explore industry stakeholder views on health regulation more broadly – particularly to  
39  
40  
41 examine whether the sentiment of desiring a level playing field can be generalised to other  
42  
43  
44  
45  
46  
47 policy areas.  
48  
49  
50  
51  
52  
53

### 54 *Conclusion*



1  
2  
3  
4 This study explored food and drink industry perspectives on the SDIL. We found that  
5  
6  
7 industry accepted that legislation was useful in levelling the commercially competitive  
8  
9  
10 playing field. However, in practice participants stated that the SDIL had not created a 'true'  
11  
12  
13 level playing field as little consideration had been given to excluded product categories  
14  
15  
16 during policy design. Implementation of the SDIL was seen as challenging and costly and  
17  
18  
19 leadership buy-in dictated strategic responses to the SDIL. However, no lasting negative  
20  
21  
22 effects of implementing the SDIL were reported. Participants stated that only targeting sugary  
23  
24  
25 soft drinks was unfair due to the progress already made in the category compared to others  
26  
27  
28 (e.g., confectionary). The impact of the SDIL was felt beyond the soft drinks industry,  
29  
30  
31 driving other product sectors to reformulate in anticipation of future regulation. The  
32  
33  
34 possibility of repeal of the SDIL was met with a mixed response: some stated it would be  
35  
36  
37 welcomed by industry while others suggested that given the significant investment already  
38  
39  
40 made to comply with the policy, reversing the SDIL would be unwelcome.  
41  
42  
43  
44  
45  
46  
47  
48  
49

50 **Acknowledgements:** For the purpose of Open Access, the author has applied a Creative  
51  
52  
53 Commons Attribution (CC BY) licence to any Author Accepted Manuscript version arising.  
54  
55  
56  
57  
58  
59  
60

1  
2  
3  
4 **Competing Interests:** None  
5  
6  
7  
8  
9

10 **Contributorship Statement:** Dr. Catrin P Jones: Conceptualization, Methodology, Formal  
11  
12  
13 analysis, Investigation, Data Curation, Writing - Original Draft, Project administration. Dr.  
14  
15  
16 Hannah Forde: Formal analysis, Writing - Review & Editing. Dr Tarra L. Penney:  
17  
18  
19  
20 Conceptualization, Methodology, Investigation, Data Curation, Writing - Review & Editing,  
21  
22  
23 Funding acquisition. Dr. Dolly R. Z. Theis: Formal analysis, Writing - Review & Editing  
24  
25  
26 Prof. Steven Cummins: Conceptualization, Methodology, Formal analysis, Writing - Review  
27  
28  
29 & Editing, Supervision, Funding acquisition. Prof. Jean Adams: Formal analysis, Writing -  
30  
31  
32 Review & Editing, Funding acquisition. Dr. Cherry Law: Formal analysis, Writing - Review  
33  
34  
35 & Editing. Prof. Harry Rutter: Formal analysis, Writing - Review & Editing, Funding  
36  
37  
38 acquisition. Prof. Richard Smith: Formal analysis, Writing - Review & Editing, Funding  
39  
40  
41 acquisition. Prof. Martin White: Conceptualization, Methodology, Resources, Supervision,  
42  
43  
44  
45  
46  
47 Project administration, Funding acquisition  
48  
49  
50  
51  
52  
53  
54  
55  
56  
57  
58  
59  
60

1  
2  
3  
4 **Funding:** This project was funded by the NIHR Public Health Research programme (Grant  
5  
6  
7 Nos. 16/49/01 and 16/130/01). At the time this study was conducted CPJ, MW, ELR, HF,  
8  
9  
10 TLP, DT, JA, OA, SA, were also supported in part by: Programme grants to the MRC  
11  
12  
13 Epidemiology Unit from the Medical Research Council (grant No. MC\_UU\_12015/6 and  
14  
15  
16 MC\_UU\_00006/7); and the Centre for Diet and Activity Research (CEDAR), a UKCRC  
17  
18  
19 Public Health Research Centre of Excellence – funding from the British Heart Foundation,  
20  
21  
22 Cancer Research UK, the Economic and Social Research Council, the Medical Research  
23  
24  
25 Council, the National Institute for Health Research, and the Wellcome Trust, under the  
26  
27  
28 auspices of the UK Clinical Research Collaboration is gratefully acknowledged. HF received  
29  
30  
31 funding for her PhD studentship from the Economic and Social Research Council and Public  
32  
33  
34 Health England, and she has received further discretionary funding from the Economic and  
35  
36  
37 Social Research Council and Murray Edwards College, Cambridge. The views expressed are  
38  
39  
40 those of the authors and not necessarily those of the any of the above-named funders. The  
41  
42  
43 funders had no role in study design, data collection and analysis, decision to publish, or  
44  
45  
46 preparation of the manuscript.  
47  
48  
49  
50  
51

52  
53  
54  
55  
56  
57 **Data sharing statement:** The lead author has full access to the data reported in the manuscript.  
58  
59  
60

1  
2  
3  
4  
5  
6  
7 **Ethics approval statement:** The study was approved by the Humanities and Social Science

8  
9  
10 Ethics Committee at the University of Cambridge, UK. No approval ID was provided by this  
11  
12  
13 committee.  
14  
15  
16  
17  
18  
19

## 20 References

- 21  
22  
23 1 Afshin A, Sur PJ, Fay KA, *et al.* Health effects of dietary risks in 195 countries, 1990–  
24 2017: a systematic analysis for the Global Burden of Disease Study 2017. *The Lancet*  
25 2019;**393**:1958–72. doi:10.1016/S0140-6736(19)30041-8
- 26  
27  
28 2 World Health Organization. Taxes on sugary drinks: Why do it? World Health  
29 Organization 2017.
- 30  
31  
32 3 HM Revenue & Customs. Soft Drinks Industry Levy.  
33 2016.[https://www.gov.uk/government/publications/soft-drinks-industry-levy/soft-](https://www.gov.uk/government/publications/soft-drinks-industry-levy/soft-drinks-industry-levy#:~:text=from the levy.,Policy objective,to reduce the sugar content)  
34 [drinks-industry-levy#:~:text=from the levy.,Policy objective,to reduce the sugar](https://www.gov.uk/government/publications/soft-drinks-industry-levy/soft-drinks-industry-levy#:~:text=from the levy.,Policy objective,to reduce the sugar content)  
35 [content](https://www.gov.uk/government/publications/soft-drinks-industry-levy/soft-drinks-industry-levy#:~:text=from the levy.,Policy objective,to reduce the sugar content) (accessed 16 Jun 2020).
- 36  
37  
38 4 HM Revenue and Customs. Soft Drinks Industry Levy statistics background and  
39 references. 2022.[https://www.gov.uk/government/statistics/soft-drinks-industry-levy-](https://www.gov.uk/government/statistics/soft-drinks-industry-levy-statistics/soft-drinks-industry-levy-statistics-background-and-references)  
40 [statistics/soft-drinks-industry-levy-statistics-](https://www.gov.uk/government/statistics/soft-drinks-industry-levy-statistics/soft-drinks-industry-levy-statistics-background-and-references)  
41 [background-and-references](https://www.gov.uk/government/statistics/soft-drinks-industry-levy-statistics/soft-drinks-industry-levy-statistics-background-and-references) (accessed 10  
42 Nov 2022).
- 43  
44  
45 5 Cabinet Office, Department of Health and Social Care, HM Treasury, *et al.* Childhood  
46 obesity: a plan for action.  
47 2016.[https://www.gov.uk/government/publications/childhood-obesity-a-plan-for-](https://www.gov.uk/government/publications/childhood-obesity-a-plan-for-action)  
48 [action](https://www.gov.uk/government/publications/childhood-obesity-a-plan-for-action) (accessed 8 Apr 2021).
- 49  
50  
51 6 Gauke D. Budget 2016. 2016. [https://www.gov.uk/government/publications/budget-](https://www.gov.uk/government/publications/budget-2016-documents)  
52 [2016-documents](https://www.gov.uk/government/publications/budget-2016-documents)
- 53  
54  
55 7 Rogers NT, Cummins S, Forde H, *et al.* Associations between trajectories of obesity  
56 prevalence in English primary school children and the UK soft drink industry levy: an  
57  
58  
59  
60

- 1  
2  
3  
4 interrupted time series analysis of surveillance data. *medRxiv* Published Online First:  
5 2022. doi:<https://doi.org/10.1101/2022.09.16.22280030>  
6
- 7 8 Hilton S, Buckton CH, Patterson C, *et al.* Following in the footsteps of tobacco and  
8 alcohol? Stakeholder discourse in UK newspaper coverage of the Soft Drinks Industry  
9 Levy. *Public Health Nutr* 2019;**22**:2317–28. doi:10.1017/S1368980019000739  
10
- 11 9 Economics O. The Economic Impact of the Soft Drinks Levy, Final Report. *London:*  
12 *Oxford Economics* 2016.  
13
- 14 10 Penney TL, Adams J, White M. Industry reactions to the UK Soft Drinks Industry  
15 Levy: Unpacking the evolving discourse from announcement to implementation. *J*  
16 *Epidemiol Community Health (1978)* 2018;**72**:A43. doi:10.1136/jech-2018-  
17 SSMabstracts.88  
18
- 19 11 Law C, Cornelsen L, Adams J, *et al.* An analysis of the stock market reaction to the  
20 announcements of the UK Soft Drinks Industry Levy. *Econ Hum Biol*  
21 2020;**38**:100834. doi:10.1016/j.ehb.2019.100834  
22
- 23 12 Law C, Cornelsen L, Adams J, *et al.* The impact of UK Soft Drinks Industry Levy on  
24 manufacturers' domestic turnover. *Econ Hum Biol* 2020;:100866.  
25
- 26 13 Penney T, Adams J, White M. LB4 Industry reactions to the UK soft drinks industry  
27 levy: unpacking the evolving discourse from announcement to implementation. *BMJ*  
28 2018. A43.1-A43. doi:10.1136/jech-2018-ssmabstracts.88  
29
- 30 14 Hilton S, Buckton CH, Katikireddi SV, *et al.* Who says what about sugar-sweetened  
31 beverage tax? Stakeholders' framing of evidence: a newspaper analysis. *The Lancet*  
32 2017;**390**:S44. doi:10.1016/s0140-6736(17)32979-3  
33
- 34 15 Buckton CH, Hilton S, Patterson C, *et al.* DID PROPONENTS AND OPPONENTS  
35 OF THE SOFT DRINKS INDUSTRY LEVY USE THE NEWS MEDIA TO  
36 INFLUENCE THE POLICY DEBATE? A QUALITATIVE DISCOURSE  
37 ANALYSIS USING PRACTICAL REASONING. *J Epidemiol Community Health*  
38 (1978) 2018;**72**:A1–2. doi:10.1136/jech-2018-SSMabstracts.2  
39
- 40 16 Buckton CH, Patterson C, Hyseni L, *et al.* The palatability of sugar-sweetened  
41 beverage taxation: A content analysis of newspaper coverage of the UK sugar debate.  
42 *PLoS One* 2018;**13**:1–15. doi:10.1371/journal.pone.0207576  
43
- 44 17 Forde H, Penney TL, White M, *et al.* Understanding Marketing Responses to a Tax on  
45 Sugary Drinks: A Qualitative Interview Study in the United Kingdom, 2019. *Int J*  
46 *Health Policy Manag* Published Online First: 23 February 2022.  
47 doi:10.34172/ijhpm.2022.5465  
48  
49  
50  
51  
52  
53  
54  
55  
56  
57  
58  
59  
60

- 1  
2  
3  
4 18 Braun V, Clarke V. *Successful Qualitative Research: A Practical Guide for Beginners*.  
5 SAGE 2013.  
6  
7 19 White M. Evaluation of the health impacts of the UK Treasury Soft Drinks Industry  
8 Levy (SDIL). 2017;;1–  
9  
10 46.<https://www.journalslibrary.nihr.ac.uk/programmes/phr/1613001/#/>  
11  
12 20 Braun V, Clarke V. *Thematic analysis: A practical guide*. Sage 2021.  
13  
14 21 Harvey WS. Methodological Approaches for Interviewing Elites. *Geogr Compass*  
15 2010;4:193–205. doi:10.1111/j.1749-8198.2009.00313.x  
16  
17 22 Berry JM, Browne W. Validity and Reliability Issues In Elite Interviewing. *PS Polit*  
18 *Sci Polit* 2003;35:679–82.  
19  
20 23 Harvey WS. Strategies for conducting elite interviews. *Qualitative Research*  
21 2011;11:431–41. doi:10.1177/1468794111404329  
22  
23 24 Goldstein K. Getting in the Door: Sampling and Completing Elite Interviews. *Political*  
24 *Science & Politics* 2002;35:669–72. doi:10.1017/S1049096502001130  
25  
26 25 Stephens N. Collecting data from elites and ultra elites: Telephone and face-to-face  
27 interviews with macroeconomists. *Qualitative Research* 2007;7:203–16.  
28  
29 doi:10.1177/1468794107076020  
30  
31 26 Braun V, Clarke V. Using thematic analysis in psychology. *Qual Res Psychol*  
32 2006;3:77–101.  
33  
34 27 Braun V, Clarke V. Can I use TA? Should I use TA? Should I not use TA? Comparing  
35 reflexive thematic analysis and other pattern-based qualitative analytic approaches.  
36  
37 *Couns Psychother Res* 2020;;37–47. doi:10.1002/capr.12360  
38  
39 28 Braun V, Clarke V. What can “thematic analysis” offer health and wellbeing  
40 researchers? *Int J Qual Stud Health Well-being* 2014;9. doi:10.3402/qhw.v9.26152  
41  
42 29 Department of Health and Social Care. Calorie labelling in the out of home sector:  
43 implementation guidance. 2021.<https://www.gov.uk/government/publications/calorie-labelling-in-the-out-of-home-sector/calorie-labelling-in-the-out-of-home-sector-implementation-guidance#:~:text=The%20out%20of%20home%20sector%20is%20generally%20considered%20to%20be,on%20or%20off%20the%20premises> (accessed 14 Dec 2022).  
44  
45 30 Department for Digital Culture Media & Sport, Department of Health & Social Care.  
46 Introducing a total online advertising restriction for products high in fat, sugar and salt  
47 (HFSS). 2021.<https://www.gov.uk/government/consultations/total-restriction-of-online-advertising-for-products-high-in-fat-sugar-and-salt-hfss/introducing-a-total->  
48  
49  
50  
51  
52  
53  
54  
55  
56  
57  
58  
59  
60

- 1  
2  
3  
4 online-advertising-restriction-for-products-high-in-fat-sugar-and-salt-hfss (accessed 6  
5 Jan 2023).
- 6  
7 31 Office for Health Improvement and Disparities. Sugar, salt and calorie reduction and  
8 reformulation. 2017.<https://www.gov.uk/government/collections/sugar-reduction>  
9 (accessed 11 Jan 2023).
- 10  
11 32 Forde H, Boyland EJ, Scarborough P, *et al*. Exploring the potential impact of the  
12 proposed UK TV and online food advertising regulations: a concept mapping study.  
13 *BMJ Open* 2022;**12**. doi:10.1136/bmjopen-2021-060302
- 14  
15 33 Petticrew M, Katikireddi SV, Knai C, *et al*. “Nothing can be done until everything is  
16 done”: The use of complexity arguments by food, beverage, alcohol and gambling  
17 industries. *J Epidemiol Community Health (1978)* 2017;**71**:1078–83.  
18 doi:10.1136/jech-2017-209710
- 19  
20 34 Scarborough P, Adhikari V, Harrington RA, *et al*. Impact of the announcement and  
21 implementation of the UK Soft Drinks Industry Levy on sugar content, price, product  
22 size and number of available soft drinks in the UK, 2015-19: A controlled interrupted  
23 time series analysis. *PLoS Med* 2020;**17**:e1003025.
- 24  
25 35 Nieburg O. Kellogg shuns “silver bullet” 30% UK cereals sugar cap.  
26 bakeryandsnacks.com.  
27 2013.[https://www.bakeryandsnacks.com/Article/2013/01/07/Kellogg-shuns-30-sugar-](https://www.bakeryandsnacks.com/Article/2013/01/07/Kellogg-shuns-30-sugar-cap-proposal-for-UK-cereals)  
28 [cap-proposal-for-UK-cereals](https://www.bakeryandsnacks.com/Article/2013/01/07/Kellogg-shuns-30-sugar-cap-proposal-for-UK-cereals) (accessed 6 Jan 2023).
- 29  
30 36 Theis D. *What influences government policymaking? The case of childhood obesity in*  
31 *England*. 2022.
- 32  
33 37 Boseley S. Jamie Oliver’s Sugar Rush: a crusade to save Britain’s health. The  
34 Guardian. 2015.
- 35  
36 38 Public Health England. Sugar Reduction The evidence for action. 2015.  
37 [https://www.gov.uk/government/publications/sugar-reduction-from-evidence-into-](https://www.gov.uk/government/publications/sugar-reduction-from-evidence-into-action)  
38 [action](https://www.gov.uk/government/publications/sugar-reduction-from-evidence-into-action) (accessed 14 Oct 2022).
- 39  
40 39 World Health Organization. Sugars intake for adults and children. 2015.  
41 <https://www.who.int/publications/i/item/9789241549028> (accessed 14 Oct 2022).
- 42  
43 40 Department for Digital CM& S, Department of Health & Social Care. Introducing  
44 further advertising restrictions on TV and online for products high in fat, salt or sugar:  
45 consultation on secondary legislation.  
46 2022.[https://www.gov.uk/government/consultations/introducing-further-advertising-](https://www.gov.uk/government/consultations/introducing-further-advertising-restrictions-on-tv-and-online-for-products-high-in-fat-salt-or-sugar-secondary-)  
47 [restrictions-on-tv-and-online-for-products-high-in-fat-salt-or-sugar-secondary-](https://www.gov.uk/government/consultations/introducing-further-advertising-restrictions-on-tv-and-online-for-products-high-in-fat-salt-or-sugar-secondary-)  
48  
49  
50  
51  
52  
53  
54  
55  
56  
57  
58  
59  
60

1  
2  
3  
4 legislation/introducing-further-advertising-restrictions-on-tv-and-online-for-products-  
5 high-in-fat-salt-or-sugar-consultation-on-secondary-legislation (accessed 15 Dec  
6  
7 2022).

- 8  
9 41 Theis D, White M. Is Obesity Policy in England Fit for Purpose? Analysis of  
10 Government Strategies and Policies, 1992–2020. *Milbank Quarterly* 2021;**99**:126–70.  
11 doi:10.1111/1468-0009.12498  
12  
13  
14  
15  
16  
17  
18  
19  
20  
21  
22  
23  
24  
25  
26  
27  
28  
29  
30  
31  
32  
33  
34  
35  
36  
37  
38  
39  
40  
41  
42  
43  
44  
45  
46  
47  
48  
49  
50  
51  
52  
53  
54  
55  
56  
57  
58  
59  
60



# BMJ Open

## Industry views of the UK Soft Drinks Industry Levy: a thematic analysis of elite interviews with food and drink industry professionals, 2018-20

|                                 |                                                                                                                                                                                                                                                                                                                                                                                                                                                                                                                                                                                                                                                                                                                                                                                                                                                                                                                                                                                                             |
|---------------------------------|-------------------------------------------------------------------------------------------------------------------------------------------------------------------------------------------------------------------------------------------------------------------------------------------------------------------------------------------------------------------------------------------------------------------------------------------------------------------------------------------------------------------------------------------------------------------------------------------------------------------------------------------------------------------------------------------------------------------------------------------------------------------------------------------------------------------------------------------------------------------------------------------------------------------------------------------------------------------------------------------------------------|
| Journal:                        | <i>BMJ Open</i>                                                                                                                                                                                                                                                                                                                                                                                                                                                                                                                                                                                                                                                                                                                                                                                                                                                                                                                                                                                             |
| Manuscript ID                   | bmjopen-2023-072223.R1                                                                                                                                                                                                                                                                                                                                                                                                                                                                                                                                                                                                                                                                                                                                                                                                                                                                                                                                                                                      |
| Article Type:                   | Original research                                                                                                                                                                                                                                                                                                                                                                                                                                                                                                                                                                                                                                                                                                                                                                                                                                                                                                                                                                                           |
| Date Submitted by the Author:   | 08-Jun-2023                                                                                                                                                                                                                                                                                                                                                                                                                                                                                                                                                                                                                                                                                                                                                                                                                                                                                                                                                                                                 |
| Complete List of Authors:       | Jones, Catrin; University of Cambridge, MRC Epidemiology Unit<br>Forde, Hannah; University of Cambridge, MRC Epidemiology Unit;<br>University of Oxford, Nuffield Department of Primary Care Health Sciences<br>Penney, Tarra; York University, Global Food System and Policy Research, School of Global Health, Faculty of Health<br>Theis, Dolly; University of Cambridge, MRC Epidemiology Unit<br>Cummins, Steven; London School of Hygiene & Tropical Medicine, Population Health Innovation Lab, Department of Public Health, Environments & Society, Faculty of Public Health and Policy<br>Adams, J; University of Cambridge, MRC Epidemiology Unit<br>Law, Cherry; University of Reading, Department of Agri-Food Economics and Marketing<br>Rutter, Harry; University of Bath Department of Social and Policy Sciences, Social and Policy Sciences<br>Smith, Richard ; University of Exeter, Faculty of Health and Life Sciences<br>White, Martin; University of Cambridge, MRC Epidemiology Unit |
| <b>Primary Subject Heading</b>: | Health policy                                                                                                                                                                                                                                                                                                                                                                                                                                                                                                                                                                                                                                                                                                                                                                                                                                                                                                                                                                                               |
| Secondary Subject Heading:      | Qualitative research                                                                                                                                                                                                                                                                                                                                                                                                                                                                                                                                                                                                                                                                                                                                                                                                                                                                                                                                                                                        |
| Keywords:                       | Health policy < HEALTH SERVICES ADMINISTRATION & MANAGEMENT, Public health < INFECTIOUS DISEASES, QUALITATIVE RESEARCH                                                                                                                                                                                                                                                                                                                                                                                                                                                                                                                                                                                                                                                                                                                                                                                                                                                                                      |
|                                 |                                                                                                                                                                                                                                                                                                                                                                                                                                                                                                                                                                                                                                                                                                                                                                                                                                                                                                                                                                                                             |

SCHOLARONE™  
Manuscripts



I, the Submitting Author has the right to grant and does grant on behalf of all authors of the Work (as defined in the below author licence), an exclusive licence and/or a non-exclusive licence for contributions from authors who are: i) UK Crown employees; ii) where BMJ has agreed a CC-BY licence shall apply, and/or iii) in accordance with the terms applicable for US Federal Government officers or employees acting as part of their official duties; on a worldwide, perpetual, irrevocable, royalty-free basis to BMJ Publishing Group Ltd ("BMJ") its licensees and where the relevant Journal is co-owned by BMJ to the co-owners of the Journal, to publish the Work in this journal and any other BMJ products and to exploit all rights, as set out in our [licence](#).

The Submitting Author accepts and understands that any supply made under these terms is made by BMJ to the Submitting Author unless you are acting as an employee on behalf of your employer or a postgraduate student of an affiliated institution which is paying any applicable article publishing charge ("APC") for Open Access articles. Where the Submitting Author wishes to make the Work available on an Open Access basis (and intends to pay the relevant APC), the terms of reuse of such Open Access shall be governed by a Creative Commons licence – details of these licences and which [Creative Commons](#) licence will apply to this Work are set out in our licence referred to above.

Other than as permitted in any relevant BMJ Author's Self Archiving Policies, I confirm this Work has not been accepted for publication elsewhere, is not being considered for publication elsewhere and does not duplicate material already published. I confirm all authors consent to publication of this Work and authorise the granting of this licence.

1  
2  
3 **Industry views of the UK Soft Drinks Industry Levy: a thematic analysis of elite interviews**  
4  
5  
6  
7 **with food and drink industry professionals, 2018-20**  
8  
9  
10

11  
12  
13 Dr Catrin P Jones<sup>a\*</sup>, Dr Hannah Forde<sup>a,<</sup>, Dr Tarra L Penney<sup>b</sup>, Dr Dolly Theis<sup>a</sup>, Prof Steven  
14  
15  
16 Cummins<sup>c</sup>, Prof Jean Adams<sup>a</sup>, Dr Cherry Law<sup>d</sup>, Prof Harry Rutter<sup>e</sup>, Prof Rich Smith<sup>f</sup>, Prof  
17  
18  
19  
20 Martin White<sup>a</sup>.  
21  
22

23  
24  
25  
26  
27 a MRC Epidemiology Unit, School of Clinical Medicine, University of Cambridge, United  
28

29  
30 Kingdom  
31

32  
33  
34 b Global Food System and Policy Research, School of Global Health, Faculty of Health,  
35  
36  
37 York University, Canada  
38

39  
40  
41 c Population Health Innovation Lab, Department of Public Health, Environments & Society,  
42  
43  
44 Faculty of Public Health and Policy, London School of Hygiene & Tropical Medicine, United  
45

46  
47 Kingdom  
48

49  
50  
51 d Department of Agri-Food Economics and Marketing, University of Reading, Reading, UK  
52

53  
54 e Department of Social and Policy Sciences, University of Bath, Bath, UK  
55

56  
57 f Faculty of Health and Life Sciences, University of Exeter, Exeter, UK  
58  
59  
60

1  
2  
3 <Present address: Nuffield Department of Primary Care Health Sciences, University of Oxford, Oxford,  
4  
5  
6 United Kingdom  
7  
8  
9

10  
11  
12  
13 **\*Corresponding Author:** Dr Catrin Pedder Jones, MRC Epidemiology Unit, University of  
14  
15  
16 Cambridge School of Clinical Medicine, Box 285 Institute of Metabolic Science, Cambridge  
17  
18  
19 Biomedical Campus, Cambridge, CB2 0QQ, United Kingdom. [Catrin.jones@mrc-](mailto:Catrin.jones@mrc-epid.cam.ac.uk)  
20  
21  
22 [epid.cam.ac.uk](mailto:Catrin.jones@mrc-epid.cam.ac.uk) +44 (0)1223 769 114  
23  
24  
25

26 **Keywords:** Soft drinks, Soft drinks industry levy, Food and drink industry, sugar sweetened  
27  
28  
29 beverage  
30  
31  
32  
33  
34  
35

36 **Word count:** 6550  
37  
38  
39  
40  
41  
42

### 43 Abstract

44  
45  
46 **Background:** The UK Soft Drinks Industry Levy (SDIL), implemented in 2018, has been  
47  
48  
49 successful in reducing the sugar content, and purchasing, of soft drinks, with limited financial  
50  
51  
52 impact on industry. Understanding the views of food and drink industry professionals  
53  
54  
55 involved in reacting to the SDIL is important for policymaking. However, their perceptions  
56  
57  
58 of the challenges of implementation and strategic responses are unknown.  
59  
60

1  
2  
3  
4 ***Aim:*** To explore how senior food and drink industry professionals viewed the SDIL.  
5  
6

7 ***Methods:*** We undertook a qualitative descriptive study using elite interviews with 14 senior  
8  
9  
10 professionals working in the food and drink industry. Braun and Clarke’s approach to  
11  
12  
13 thematic analysis was used to analyse the data, taking an inductive exploratory and  
14  
15  
16  
17 descriptive approach not informed by prior theory or frameworks.  
18  
19

20 ***Results:*** Five main themes were identified: *(1) A level playing field...for some*; Industry  
21  
22  
23 accepted the SDIL as an attempt to create a level playing field but due to the exclusion of  
24  
25  
26  
27 milk-based drinks, this was viewed as inadequate. *(2) Complex to implement, but no lasting*  
28  
29  
30 *negatives*; The SDIL was complex, expensive and time consuming to implement, with  
31  
32  
33 industry responses dependent on leadership buy-in. *“(3) Why us? – the SDIL unfairly targets*  
34  
35  
36 *the drinks industry”*; soft drinks are an unfair target when other categories also contain high  
37  
38  
39  
40 sugar. *“(4) The consumer is king”*; Consumers were a key focus of the industry response to  
41  
42  
43 this policy. *“(5) The future of the SDIL”*; There appeared to be a wider ripple effect, which  
44  
45  
46  
47 primed industry to prepare for future regulation in support of health and environmental  
48  
49  
50  
51 sustainability.  
52  
53  
54  
55  
56  
57  
58  
59  
60

1  
2  
3  
4 **Conclusions:** Insights from senior food and drink industry professionals illustrate how sugar  
5  
6  
7 sweetened beverage taxes might be successfully implemented and improve understanding of  
8  
9  
10 industry responses to taxes and other food and drink policies.  
11  
12  
13  
14  
15  
16

### 17 **Strengths and Limitations**

- 20 • This qualitative study explored how senior food and drink industry professionals  
21  
22 viewed the SDIL.  
23  
24
- 25 • We undertook elite interviews with 14 professionals working in the food and drink  
26  
27 industry, who have often been difficult to recruit in other studies.  
28  
29
- 30 • Braun and Clarke's thematic analysis taking a descriptive approach was used to  
31  
32 analyse the data.  
33  
34
- 35 • Elite interviewing methods allow for the building of relationships to elicit meaningful  
36  
37 responses from participants.  
38  
39
- 40 • Due to recruitment challenges, interviews were carried out over a long period of time,  
41  
42 meaning participants experienced different political contexts when data was collected.  
43  
44  
45  
46  
47  
48  
49  
50  
51  
52  
53  
54  
55  
56  
57  
58  
59  
60

## Introduction

Diet-related non-communicable diseases are a major and growing problem, responsible for over 11 million deaths globally each year [1]. Sugar consumption is of particular concern, with the World Health Organization (WHO) recommending member states introduce sugar-sweetened beverage (SSB) taxes [2]. Reviews suggest that they reduce sales of, increase prices of and encourage reformulation of SSBs [3–5] and over 100 SSB taxes have been implemented worldwide covering 52% of the world's population [6]. SSB taxes have a variety of designs with 87% excise taxes [6]. The WHO recommend that a tiered SSB tax be introduced in countries with high administrative capacity, similar to that which has been introduced in the UK [2]. The Soft Drinks Industry Levy (SDIL) was announced on 16<sup>th</sup> March 2016 and implemented in the United Kingdom (UK) on 6<sup>th</sup> April 2018. According to the budget speech by George Osborne, Chancellor of the Exchequer at the time, it was designed to incentivise manufacturers of SSBs to reformulate their products [7] via charging a levy on soft drinks produced by companies when they leave the warehouse or when imported into the country [8]. Integrated in August 2016 as part of the UK Government's Childhood Obesity: A Plan For Action [9], the SDIL consists of two tiers (for particulars of the tax see box 1). A public consultation on the proposals between August - October 2016 set

1  
2  
3  
4 out the plans for the tiers and exclusions as described in Box 1. Few changes were made as a  
5  
6  
7 result of this consultation and the SDIL was given royal assent on 27th April 2017. The  
8  
9  
10 Government published a second chapter of its childhood obesity plan in 2018, which  
11  
12  
13 suggested the SDIL may be extended to milk-based drinks, though this has not yet occurred  
14  
15  
16  
17 [10].  
18  
19  
20  
21  
22  
23  
24  
25  
26  
27  
28  
29  
30  
31  
32  
33

34 **Box 1: Soft Drinks Industry Levy Particulars [7]**

35  
36  
37 **Eligible drinks:**

- 38 •  $\geq 8$  g total sugar per 100 mL charged at 24 pence per litre
- 39
- 40 •  $\geq 5$  g and  $< 8$  g total sugar per 100 mL charged at 18 pence per litre
- 41
- 42
- 43
- 44
- 45
- 46

47 **Exemptions:**

- 48 • Drinks containing more than 75% milk or 1.2% alcohol
- 49
- 50
- 51 • Alcohol substitute drinks
- 52
- 53
- 54
- 55
- 56 • Powdered drinks
- 57
- 58
- 59
- 60



- 100% fruit juices
- Manufacturers selling under one million litres of drinks per year[11]

The SDIL was one of the first SSB fiscal interventions explicitly designed to incentivise reformulation [7,12,13]. This aim was largely achieved, substantially reducing overall SSB sugar content, and inducing a major shift of drinks from the higher levy tier to the lower tier and untaxed bracket between 2016 and 2018 (Scarborough et al., 2020). Reformulation is reflected in purchases of sugar from SSBs, with [14]. Prior to implementation of the SDIL, the food and drinks industry (hereafter referred to as ‘industry’) viewed the SDIL as having a potentially negative impact on profits resulting in job losses [15–17]. A negative stock market reaction to the SDIL announcement was observed, but this only lasted two days [18]. Similarly, a negative impact on company domestic turnover was observed following the announcement of the SDIL, but this resolved by the time of its implementation [19].

Critical to the success of the SDIL is the implementation of and reaction to the regulations by the drink industry. Therefore, it is important to understand perspectives of the industry as well as those who work in it regarding the implementation of such taxes. Previous work has

1  
2  
3 investigated industry perspectives of the SDIL expressed through the news media [15,20–23]  
4  
5  
6  
7 and the views of industry, civil society and academic participants on how marketing changed  
8  
9  
10 in response to the SDIL [24]. A notable gap in the literature, however, is perspectives of the  
11  
12  
13 SDIL from the commercial sector, not communicated publicly through news media nor  
14  
15  
16 focused solely on marketing responses. Important learning can be obtained by exploring the  
17  
18  
19 perspectives of commercial actors involved in responding to regulation. Interviews with  
20  
21  
22  
23 senior members of industry can help examine the impact of the SDIL on both the soft drinks  
24  
25  
26 industry and wider food and drink industry, an avenue not previously explored. This study  
27  
28  
29 therefore aimed to address these knowledge gaps and inform policymaking by exploring the  
30  
31  
32 perspectives of senior industry professionals regarding the UK SDIL.  
33  
34  
35  
36  
37  
38  
39  
40

## 41 **Methods**

### 42 43 *Study Design*

44  
45  
46 This study adopted a qualitative descriptive design involving elite interviews with senior  
47  
48  
49 industry professionals.  
50  
51  
52  
53  
54  
55  
56

### 57 *Methodological Orientation*

58  
59  
60

1  
2  
3  
4 This research took an experiential qualitative approach, within a critical realist position.  
5  
6

7 Participant perspectives and perceptions were prized over researcher interpretations, and  
8  
9

10 reality was derived from our participants' words and meaning, rather than a reality  
11  
12

13 constructed through researchers' interpretation of their words [25]. A descriptive approach  
14  
15

16 was used to explore how the SDIL was viewed from the position of our participants.  
17  
18  
19  
20  
21  
22

### 23 ***Research Team***

24  
25  
26 Prof Martin White (MW), Prof Steven Cummins (SC), Prof Jean Adams (JA), Prof Rich  
27  
28

29 Smith (RS) and Prof Harry Rutter (HR) secured funding for the overall evaluation of the  
30  
31

32 SDIL within which this study formed a part [26]. Interviews were conducted by Postdoctoral  
33  
34

35 Research Associates Dr. Tarra L Penney (TLP) and Dr. Catrin P Jones (CPJ). TLP led the  
36  
37

38 design of data collection and CPJ led the design of the analysis. MW & SC provided  
39  
40

41 guidance on the design of both elements. TLP and CPJ recruited and interviewed participants.  
42  
43

44  
45  
46 CPJ led the analysis with support from Dr Hannah Forde (HF). HF conducted secondary  
47  
48

49 coding to support theme generation and interpretation. All authors previously mentioned, as  
50  
51

52 well as Dr Dolly Theis (DT) and Dr Cherry Law (CL) were involved in data analysis and  
53  
54

55 interpretation, as well as drafting this manuscript.  
56  
57  
58  
59  
60

## *Participants*

Senior professionals from the soft drinks, food and other drinks industries were recruited to this study using purposive and snowball sampling. We adopted 'elite interviewing' methods to maximise involvement of senior professionals in positions of influence within their organisation and with high levels of responsibility [27]. This technique provides a series of strategies to support recruitment of difficult to access key participants, and to ensure the validity and reliability of data [28]. The principles of elite interviewing were used to inform recruitment including stronger emphasis on the maintenance of trust, importance of interview tone of the interview, preparing appropriately, and engaging in and tailoring dialogue relevant to each informant, more so than in traditional interviews [29,30].

Individuals were considered eligible to participate based on the following criteria: a) currently or previously held a high-level industry position (at the managerial, director or chief officer level), b) their organisation and their professional role was directly or indirectly impacted by the SDIL and c) they could provide a novel perspective, determined by their job role or the company they work for not previously heard in our interviews, to ensure a range

1  
2  
3  
4 of views. Recruitment typically involved an email introduction by a member of the team or  
5  
6  
7 informant contact, although CPJ also attended industry food events and recruited face to face.  
8  
9

10 Initial contact was followed by an informal telephone conversation with TLP or CPJ to  
11  
12  
13 discuss the research purpose, team and informant interests and perspectives, ultimately  
14  
15  
16 proceeding to full participation via telephone interview.  
17  
18  
19  
20  
21  
22

### 23 *Data Collection*

24  
25  
26 Telephone interviews were conducted from June 2018 to June 2020. Participant information  
27  
28  
29 sheets were sent to potential participants prior to participating in the informal discussion.  
30  
31  
32  
33 Informed consent was obtained verbally prior to commencement of the formal telephone  
34  
35  
36 interview, which was digitally audio-recorded. Interviews were undertaken using a minimally  
37  
38  
39 structured topic guide containing three broad areas of inquiry: a) Can you tell me about your  
40  
41  
42 role and organization? b) Can you tell me about your sector as a whole? c) What do you  
43  
44  
45 know about the UK Soft Drinks Industry Levy and its impacts? Elite interviewing  
46  
47  
48 necessitates informed and adaptive dialogue [29,31], meaning participants could engage in  
49  
50  
51 ways most relevant to their specific expertise or experiences within these broad areas.  
52  
53  
54  
55

56  
57 Interviews were transcribed verbatim by a trusted external company, and transcripts were  
58  
59  
60

1  
2  
3  
4 checked against the audio files by CPJ to identify any inaccuracies. Transcripts were  
5  
6  
7 anonymised prior to analysis by removing names of people, organisations, and brands.  
8  
9  
10  
11  
12

### 13 *Analysis*

14  
15  
16  
17 Analysis commenced once all interviews had been conducted and transcribed. Braun and  
18  
19  
20 Clarke's thematic analysis was used, taking an inductive exploratory and descriptive  
21  
22  
23 approach not informed by any prior theory or framework [32]. This approach is flexible due  
24  
25  
26 to lack of alignment with specific epistemological and ontological stance [33,34]. Six  
27  
28  
29 analytic steps were conducted: 1) familiarisation, 2) data coding, 3) initial theme generation,  
30  
31  
32  
33 4) theme development and review, 5) theme refining, defining and naming, 6) writing up.  
34  
35  
36  
37  
38  
39  
40 CPJ listened to audio files and read transcripts at least twice to become familiar with them,  
41  
42  
43 whilst making notes on initial impressions and patterns (step 1). Following familiarisation,  
44  
45  
46  
47 CPJ worked systematically through the entire data set and conducted complete coding of all  
48  
49  
50 data, in which segments of data were given a label to describe their area of interest. Coding  
51  
52  
53  
54 was supported by NVivo software version 12. Semantic codes were derived directly from  
55  
56  
57 participants' speech or codes where phrases of speech were brief enough to be directly coded  
58  
59  
60

1  
2  
3  
4 (step 2). CPJ then sorted these initial codes into concise categories (overarching codes),  
5  
6  
7 which clearly described the content of the data (step 3). A reflective diary was kept  
8  
9  
10 throughout the coding process by CPJ to note reflections on findings and to ensure a data-  
11  
12  
13 driven analytic process.  
14  
15  
16  
17  
18  
19

20 HF also familiarised themselves with the transcripts (step 1) and then examined CPJ's coding to  
21  
22  
23 ensure the codes were data driven with as little interpretation as possible (step 2). CPJ then  
24  
25  
26 collated codes that shared a common pattern into themes (step 3). Again, CPJ and HF met to  
27  
28  
29 discuss and refine the themes to ensure they were descriptive with minimal interpretation  
30  
31  
32  
33 (step 4).  
34  
35  
36  
37  
38  
39

40 A document containing themes, codes within them, and extensive anonymised quotes was  
41  
42  
43 shared with all co-authors in two phases: phase 1 March 2022 and phase 2 October 2022  
44  
45  
46  
47 (step 5). This data clinic aimed to minimise researcher interpretation. A document presented  
48  
49  
50 theme descriptions and asked co-authors to answer the following questions for each theme: 1)  
51  
52  
53 Is the theme descriptive? 2) Does the theme represent the data accurately? 3) What do you  
54  
55  
56 think the theme tells us about the SDIL from the perspective of industry? JA, DT, CL  
57  
58  
59  
60

1  
2  
3  
4 completed the data clinic document in phase 1. Themes were amended based on their  
5  
6  
7 reflections and the document updated in October 2022. SC, MW, HR & RS completed the  
8  
9  
10 data clinic form in phase 2. Final themes and the manuscript were written up by CPJ and  
11  
12  
13 reviewed by all co-authors (step 6).  
14  
15  
16  
17  
18  
19

### 20 *Patient and Public Involvement Statement*

21  
22  
23 This study is part of the 'Evaluation of the health impacts of the UK Treasury Soft Drinks  
24  
25  
26 Industry Levy (SDIL)' funded by NIHR ([award no. 16/130/01](#)). Project oversight is provided  
27  
28  
29 by an independent study steering committee (ISSC) which contains members of the public.  
30  
31  
32  
33 The ISSC for the overall project met biannually from 2017 – 2023 and were asked to provide  
34  
35  
36 advice on methodology as well as interpretation of our findings.  
37  
38  
39  
40  
41  
42  
43

### 44 **Results**

45  
46  
47 Fourteen participants were recruited (Table 1). Participants' roles within organisations were  
48  
49  
50 diverse; chief officers, directors, and managers with overall responsibility or with specialist  
51  
52  
53 responsibilities for finance, strategy, operations, marketing, public relations or nutrition.  
54  
55  
56

57 Interviews ranged in length from 26 to 62 minutes. Six additional participants were  
58  
59  
60



1  
2  
3 approached and took part in informal discussions; three did not participate due to scheduling  
4  
5  
6  
7 issues, and three refused to take part. Five inductively derived, interlinked themes and 15  
8  
9  
10 subthemes were identified (Box 2).  
11  
12  
13  
14  
15  
16  
17  
18  
19  
20  
21  
22  
23

24 Table 1: Participant details  
25

| Sector Category                           | N |
|-------------------------------------------|---|
| Drink manufacturers                       | 4 |
| Food and drink manufacturers              | 3 |
| Supermarkets                              | 3 |
| Industry associations                     | 1 |
| Out-of-home* food and drink manufacturers | 1 |
| Out-of-home retailers                     | 1 |
| Advertising consultants                   | 1 |

26  
27  
28  
29  
30  
31  
32  
33  
34  
35  
36  
37  
38  
39  
40  
41  
42  
43  
44  
45  
46  
47  
48  
49  
50  
51  
52  
53  
54 *\*\* “The out-of-home sector is generally considered to be any outlet where food or drink is prepared in a way  
55 that means it is ready for immediate consumption, on or off the premises”[35]*  
56  
57

58 Box 2: Theme and sub-theme summary.  
59  
60

1  
2  
3  
4 Theme 1: A level playing field...for some

5 *The SDIL created a level playing field*

6 *Milk-based drinks increased the complexity in the out-of-home sector*

7 *Challenges for supermarkets with large product portfolios*

8  
9  
10  
11 Theme 2: Complex to implement but no lasting negative effects

12 *Complexities in strategic response – price and product are key*

13 *Global companies and internal systems*

14 *Contradictory government messaging*

15 *Leadership buy-in dictates strategic response*

16 *Few long-lasting negative effects & SDIL provided opportunities*

17  
18  
19  
20  
21  
22  
23 Theme 3: Why us? – The SDIL unfairly targets the drinks industry

24 *Sugary drinks in isolation were unfair targets for regulation*

25 *Distrust of government's motivations to introduce the SDIL*

26  
27  
28  
29 Theme 4: Consumer is king

30 *Consumer response to product changes resulting from the SDIL*

31 *Consumer momentum towards healthier products*

32  
33  
34  
35 Theme 5: The future of the SDIL

36 *Extending to milk and fruit-based drinks*

37 *Impact on the wider food and drink industry and on other sectors*

38 *Proposal to reverse the SDIL*

39  
40  
41  
42  
43  
44  
45  
46  
47  
48

49 ***Theme 1: A level playing field...for some***

50  
51  
52 ***The SDIL created a level playing field***

53  
54  
55 Industry professionals accepted that the SDIL helped create a level playing field, where no

56  
57  
58 organisation lost out by taking action on health that their competitors did not "... legislation

59  
60

1  
2  
3  
4 *level playing fields is so important and that's why with these big public health*  
5  
6  
7 *initiatives...I'm actually really quite pro government intervention” – Supermarket. Soft*  
8  
9  
10 drinks manufacturers also discussed that the two years to prepare for the implementation of  
11  
12  
13 the SDIL was sufficient and they were happy they could develop an adequate response within  
14  
15  
16 that time. *“I'm not aware of any significant implementation or challenges that our members*  
17  
18  
19 *have encountered, I mean they did have time to adapt, the legislation was published in good*  
20  
21  
22 *time to allow them to understand exactly what they would be required to do” – Trade*  
23  
24  
25  
26  
27 *association*  
28  
29  
30  
31  
32  
33

34 However, participants also stated that a lack of understanding and consultation from  
35  
36 government meant a 'true' level playing field for all sectors involved in the sales of sugary  
37  
38 drinks had not been not achieved *“...you want to really do it smartly so everybody feels*  
39  
40  
41 *they're 100% equally affected and you don't get this... 'my product is in scope, your product*  
42  
43  
44 *is out of scope'...it doesn't create the sense of unilateral 'let's do this'... which is what it*  
45  
46  
47 *should be, if that makes sense” – Food and drink manufacturer. The lack of consultation by*  
48  
49  
50  
51 the government with sectors who were not soft drinks manufacturers (for example out of  
52  
53  
54 home retailers) and the exclusion of milk-based sugary drinks led to this perception *“...milk-*  
55  
56  
57  
58  
59  
60

1  
2  
3  
4 *based drinks often carried bigger serving sizes and had more total sugar in them than any of*  
5  
6  
7 *our products would. They were excluded from the levy as well which looked like a big*  
8  
9  
10 *shortcoming.” Drink manufacturer.*  
11  
12  
13  
14  
15  
16

17 ***Milk-based drinks increased the complexity in the out-of-home sector***  
18

19  
20 Interviewees explained that, from their perspective, the government did not think clearly  
21  
22  
23 about the technical implications for retailers and out-of-home sector and that it was easier for  
24  
25  
26 soft drink manufacturers to respond to the levy than it was for other industry actors “...I  
27  
28  
29 *don’t think they understood the ways of working and the preparation methods in the out-of-*  
30  
31  
32  
33 *home sector...*” – *Out-of-home food and drink manufacturer.* A high level of complexity  
34  
35  
36 within the out-of-home sector to manufacture and produce drinks for immediate consumption  
37  
38  
39 led to higher implementation costs; specifically, the exclusion of milk-based drinks and  
40  
41  
42  
43 specification around eligibility of drinks mixed with carbon dioxide, water and ice, and those  
44  
45  
46 with and without milk. “...they were looking at the likes of drinks fountains for carbonated  
47  
48  
49 *soft drinks because... a bag and box syrup, they would be mixed with ice or carbon dioxide*  
50  
51  
52  
53 *to give the carbonation or either they could be mixed with water and that would capture those*  
54  
55  
56  
57 *drinks in the out-of-home sector, but there was a vagueness to milk-based drinks” – Out-of-*  
58  
59  
60

1  
2  
3  
4 *home food and drink manufacturer*. Some queries to Her Majesty's Revenue and Customs  
5  
6  
7 (HMRC – the tax collecting authority in the UK) went unanswered, thus, the out-of-home  
8  
9  
10 sector had to interpret the legislation themselves and apply the SDIL according to their  
11  
12  
13 interpretation. Representatives of the out-of-home sector did not perceive two years as  
14  
15  
16 enough time to have prepared due to confusion surrounding eligibility. In contrast, soft drinks  
17  
18  
19 manufacturers stated they had had time to prepare.  
20  
21  
22  
23  
24  
25  
26

### 27 ***Challenges for supermarkets with large product portfolios***

28  
29  
30 Supermarkets felt disadvantaged compared to soft drink manufacturers by the complexities of  
31  
32  
33 their sector. They highlighted sector-specific challenges to adapting to the SDIL, including  
34  
35  
36 that their product portfolio not only contains branded drinks, about which they have to make  
37  
38  
39 decisions, but also private label (own brand) drinks “...*what branded suppliers chose to do*  
40  
41  
42 *was their choice...different brands choosing to reformulate, resize or inflate, which I think*  
43  
44  
45 *led to a fair bit of customer confusion as to what the hell was going on.* “ – Supermarket. It  
46  
47  
48 was described as challenging and time consuming to manage such a large portfolio and make  
49  
50  
51 decisions on each product. Particularly as reformulation decisions and portion size reduction  
52  
53  
54 reportedly differed between brands yet had to be merchandised together within stores.  
55  
56  
57  
58  
59  
60

1  
2  
3  
4 Retailers also felt that they were disadvantaged as their customers expressed confusion at  
5  
6  
7 differing responses by different brands – e.g. ‘sugary’ drinks reformulated to just below the  
8  
9  
10 SDIL threshold but containing both sugar and sweeteners confused customers, with queries  
11  
12  
13 directed at retailers rather than drinks manufacturers “... we tried to make it as clear for  
14  
15  
16 customers by putting on all the [shelves] sugar levy applied, so they could very much  
17  
18  
19 see...But... when they see a sugar line that’s not [included in the SDIL], that’s when the  
20  
21  
22 questions start coming.” – Supermarket.  
23  
24  
25  
26  
27  
28  
29

## 30 ***Theme 2: Complex to implement but no lasting negative effects***

### 31 32 33 ***Complexities in strategic response – price and product are key***

34  
35  
36  
37 Industry responded to the SDIL by reviewing product portfolios and strategically selecting  
38  
39  
40 responses at the individual product level. This portfolio review approach is why responses  
41  
42  
43 differed between companies and between products. Research and development (R&D) and  
44  
45  
46 consumer testing were costly for industry during this process, and, linking to theme 1, there  
47  
48  
49 were increased costs for those companies with larger product portfolios (e.g. supermarkets).  
50  
51  
52  
53 For the out-of-home sector, additional complications were noted due to confusion over  
54  
55  
56 eligibility of some milk-based drinks “...government is very keen to always say “oh just  
57  
58  
59  
60

1  
2  
3  
4 *reformulate, it will be easy” but it’s not easy. It actually takes a lot of time and investment.” –*  
5  
6

7 *Drink manufacturer.*  
8  
9  
10  
11  
12

13 Consumer testing was vital during the reformulation and decision-making process and  
14  
15  
16  
17 consumer preference dictated the strategy taken “... *we invested a significant amount of*  
18  
19  
20 *money...in developing lots and lots of different formulations with lower sugar to see and*  
21  
22  
23 *testing them with consumers in Great Britain to see whether those recipes... would be*  
24  
25  
26 *acceptable to consumers.” – Drink manufacturer. An additional challenge in reformulating*  
27  
28  
29  
30 drinks described by manufacturers was that sugar serves a functional purpose, in the  
31  
32  
33  
34 mouthfeel of drinks mixed with ice and to prevent ‘brain freeze’, as well as to provide  
35  
36  
37 sweetness “*Because, actually, yes, we could stick sweeteners in everything, but, actually,*  
38  
39  
40 *sugar also has like a functional role” – Out-of-home retailer.*  
41  
42  
43  
44  
45  
46

47 Packaging, merchandising and placement were challenges to overcome, particularly for  
48  
49  
50 supermarkets. Decisions were made on own brand products but also on how to retail other  
51  
52  
53  
54 branded products with different responses to the SDIL (e.g. reformulated drinks, reduced and  
55  
56  
57 increased portion sizes, rebranding) “...*there were a number of products that didn’t*  
58  
59  
60

1  
2  
3  
4 *reformulate but did drop size. So, again, there's just small considerations in that around how*  
5  
6  
7 *you merchandise it... So what sounds like a relatively simple change, of dropping from*  
8  
9  
10 *330ml to, I don't know, 250ml, in reality kind of that complexity flows back through the*  
11  
12  
13  
14 *value chain" – Supermarket.*

### ***Leadership buy-in dictates strategic response***

15  
16  
17  
18  
19  
20  
21  
22  
23 Leadership buy-in to health, where senior management 'buy-in' to the idea that their  
24  
25  
26  
27 company should be making pro-health decisions, was discussed as vital in dictating the  
28  
29  
30 strategic response to the SDIL "... I think such a review requires strong leadership and ... our  
31  
32  
33  
34 *COO was very clear that we needed to step in and we needed to do, you know, do the*  
35  
36  
37 *responsible, brave thing." -Drink manufacturer. Participants described this buy-in as making*  
38  
39  
40 the process simpler and a lack of buy-in as a barrier to making timely progress "... having  
41  
42  
43 *that strong leadership and, you know, complete buy-in from the top team and actually pretty*  
44  
45  
46  
47 *much all the other levels of the organisation, then it's actually quite simple" – Drink*  
48  
49  
50 *manufacturer.*

### ***Global companies and internal systems***



1  
2  
3  
4 The cost of setting up internal systems to account for and pay the SDIL was expensive, due to  
5  
6  
7 the requirement to report to HMRC, regardless of whether or not a company involved in the  
8  
9  
10 manufacture or selling of soft drinks was liable to pay the levy “...*It’s ridiculous that, you*  
11  
12  
13 *know, it’s cost us half a million pounds just to tell Treasury that actually we don’t need to*  
14  
15  
16 *pay it.*” – *Drink manufacturer.* The global nature of many of these companies was an  
17  
18  
19 additional challenge. Response strategies appropriate for a UK market may not be  
20  
21  
22 transferable to other countries, for example reformulation recipes vary due to differences in  
23  
24  
25 consumer palate and storage temperatures/facilities “...*that’s [computer system] for the UK,*  
26  
27  
28 *and then Ireland have a separate system, France have a separate system, Mexico have a*  
29  
30  
31 *separate system.* “ – *Food and drink manufacturer.*

### 40 ***Contradictory government messaging***

41  
42  
43 There was confusion over whether manufacturers needed to pass on price increases to change  
44  
45  
46 consumer behaviour due to contradictory government messaging over the aim of the SDIL.  
47  
48  
49 Participants indicated that they thought price increases should have been passed on to target  
50  
51  
52 individual behaviour change; however, manufacturers stated they had no control over  
53  
54  
55 whether this occurred as retailers set the price for consumers “...*[the] government had*  
56  
57  
58  
59  
60

1  
2  
3  
4 *slightly mixed messages so it was pretty clear from the Department of Health and PHE*

5  
6  
7 [Public Health England] ... *that they expected to see prices passed on ... I think the Treasury*  
8  
9  
10 *were trying to say, oh soft drinks manufacturers don't have to pass this on... Well, apart from*  
11  
12  
13 *the fact that most businesses won't absorb a cost if they can avoid it for obvious reasons, it*  
14  
15  
16  
17 *was the opposite of what the Health Department and others wanted...* – *Drink manufacturer.*

18  
19  
20  
21  
22  
23  
24 ***Few long-lasting negative effects & SDIL provided opportunities***

25  
26  
27 Participants acknowledged that the SDIL did achieve its aim in stimulating product  
28  
29  
30 reformulation to avoid the levy. Although implementation was complex and costly, as  
31  
32  
33 previously illustrated, there were few long-lasting negative effects. Some participants  
34  
35  
36 suggested the SDIL provided opportunities *"I think some of them would have switched back*  
37  
38  
39 *but we've gained new consumers as well which is, you know, how we, which through*  
40  
41  
42 *sampling and advertising essentially."* – *Drink manufacturer.* However, participants were  
43  
44  
45  
46  
47 sceptical that the SDIL would achieve intended reductions in childhood obesity in the UK.  
48  
49  
50  
51 *"... why [the SDIL] it was thought that that would be a, that policy in isolation would be*  
52  
53  
54 *sufficient to reduce obesity rates."* – *Drink manufacturer.*

1  
2  
3  
4 ***Theme 3: Why us? – The SDIL unfairly targets the drinks industry***  
5

6  
7 ***Sugary drinks in isolation were unfair targets for regulation***  
8  
9

10 Participants felt that the SDIL unfairly targets the soft drinks industry. Participants expressed  
11  
12 their frustration that a single food category was targeted when other food categories bear a  
13  
14 significant proportion of the responsibility for childhood obesity. They expressed the view  
15  
16 that multiple nutrients or calories across many food and drink sectors should be targeted by  
17  
18 regulation if the government is serious about reducing childhood obesity, particularly as  
19  
20 substitution to other non-regulated food categories could negate the impact of the SDIL on  
21  
22 health "...why would it be just the soft drink levy, why would you not target cakes and  
23  
24 biscuits...that's what we didn't understand at the time." - Food and drink manufacturer..  
25  
26  
27  
28  
29  
30  
31  
32  
33  
34  
35  
36  
37  
38  
39

40 There was consensus among participants that it did not make sense for the government to  
41  
42 target a category that they considered was already reducing sugar faster than other food  
43  
44 categories. Although the SDIL had accelerated the reformulation progress for some, this was  
45  
46 stated to be already occurring prior to the SDIL announcement. Participants expressed the  
47  
48 view that the sector had been unfairly penalised, and that sectors which reformulate should be  
49  
50 praised rather than targeted by regulation when other unregulated categories have contributed  
51  
52  
53  
54  
55  
56  
57  
58  
59  
60

1  
2  
3 little towards achieving health goals. "... *the soft drinks category was already well embarked*  
4  
5  
6  
7 *on the journey to reformulation...part of the industry's disappointment and frustration about*  
8  
9  
10 *the announcement of the levy was that they were already absolutely going to deliver what the*  
11  
12  
13 *levy has now kind of made them deliver"* – Trade association

### ***Distrust of government's motivations to introduce the SDIL***

23 Participants stated that the SDIL was politically motivated, not an evidence-based policy.

26 Government policies targeting obesity were described as contradictory and not aligned with

29 one another, particularly the proposed ban on advertising of less healthy foods on TV and

32 online [36]. According to participants, the advertising ban does not distinguish between

35 reformulated and non-reformulated products, and acts as a disincentive to spending on

38 reformulation if they cannot recoup their investment through advertising new products. "*So if*

41 *you can take something from 40g of sugar to 20g of sugar but you'd only advertise on TV is*

44 *it's 5(g), then why bother, right, and it also means that they can't tell the world, look at this*

47 *amazing thing we've done, we've reformulated this"* – Advertising consultant.

1  
2  
3 Perceived disconnectedness between policies led to distrust in the government and a belief  
4  
5  
6  
7 that government obesity policy is poorly planned. Distrust was compounded by some  
8  
9  
10 companies appearing to be successful at lobbying the government following the  
11  
12  
13 announcement, resulting in changes to the regulations as a result of this lobbying, rather than  
14  
15  
16 on the basis of health or nutrition, in particular the decision to exclude milk-based drinks.

17  
18  
19  
20 Participants stated this was motivated by some companies being able to gain a competitive  
21  
22  
23 advantage, as some milk-based drinks have higher sugar content than soft drinks. Participants  
24  
25  
26 also referred to the SDIL as a political tool to distract from other things in the budget in  
27  
28  
29 which it was announced "... *I think this was a decision taken within the Treasury by quite a*  
30  
31  
32  
33 *small group of people and it was announced during a Budget by a Chancellor who was trying*  
34  
35  
36 *to distract from some other economic figures that he maybe wasn't too pleased about.*" –

37  
38  
39  
40 *Drink manufacturer.* The fact that the proposal to establish the SDIL had been kept secret,  
41  
42  
43 and the announcement was a shock to many, led to this view. "*I think the timing was a*  
44  
45  
46 *surprise... Yeah and the way it was done without any form of consultation or pre-*  
47  
48  
49 *announcement.*" – *Drink manufacturer.*

50  
51  
52  
53  
54  
55  
56  
57 ***Theme 4: Consumer is king***  
58  
59  
60

### *Consumer response to product changes resulting from the SDIL*

Industry participants discussed throughout all previous themes that meeting the wishes of consumers was the priority when responding to the SDIL. Taste preferences and tolerance of reformulation changes were critical and companies expressed concerns that consumers might dislike reformulated products if they changed dramatically in a short time period "... obviously what's critical from our perspective is developing a product that consumers still like the taste of whilst reducing their sugar intake so that we were trying to marry-up those two things." – Drink manufacturer. Company responses to the SDIL, as well as health and environmental issues more broadly, were vital to maintaining brand loyalty and company reputation in the eyes of consumers. The media were seen as influential in shaping consumer preferences and company reputation, as some newspapers had used graphics to show the sugar content of drinks and this was considered to have influenced purchasing patterns. According to informants a small group of very loyal consumers can cause a backlash publicly, which can be picked up by both the news media and social media.

### *Consumer momentum towards healthier products*

1  
2  
3  
4 Participants stated consumer purchasing patterns are changing, with consumers increasingly  
5  
6  
7 choosing lower sugar products, which may also have driven reformulation prior to the SDIL.  
8  
9

10 The policy acted as a catalyst for increasing consumer demand for sugar reduction and some  
11  
12  
13 respondents also highlighted the role of social media in driving these trends. Consumers were  
14  
15  
16 also reported by participants as “moving away from” artificial ingredients, which leads to  
17  
18  
19 challenges in reformulation using non-nutritive sweeteners *"A lot of our consumers like ..., ,*  
20  
21  
22  
23 *they don't want to have sweeteners, they don't want to have preservatives" – Drink*  
24  
25  
26 *manufacturer.* Some participants suggested that consumers were not lost when sugar was  
27  
28  
29 reduced in their favourite products, due to consumer preferences moving towards prioritising  
30  
31  
32 health. It was important to participants and their organisations that consumers have enough  
33  
34  
35 choice and there were concerns that regulation could limit choice from some.  
36  
37  
38  
39  
40  
41  
42  
43

#### 44 ***Theme 5: The future of the SDIL***

45  
46  
47 Participants discussed the potential of expanding the SDIL to fruit and milk-based drinks, the  
48  
49  
50 wider threat to other products, reformulation in other categories, changes in other sectors as a  
51  
52  
53 result of the SDIL and the possibility of its reversal by government.  
54  
55  
56  
57  
58  
59  
60

### ***Extending to milk and fruit-based drinks***

Concerns were expressed over the Chancellor's proposal to extend the SDIL to milk-based and fruit-based drinks at the time of the announcement *"I don't think politicians think it's done. Obviously we've got the review next year on whether milk-based drinks should be included, and then I think it's 2021 when they'll review the levels as well."* – Drink manufacturer. Participants stated the nutritional benefits of these meant that natural sugars (fructose and lactose) should not be subject to the same regulation as soft drinks. The vitamin and mineral content of these drinks was also discussed as a benefit to children who may not be consuming sufficient fruit, vegetables or calcium from other sources *"... Now you have products that are being developed with high levels of sugar in them so that really does need to be addressed but you don't want to go down the route of demonising milk because it is still a great source of nutrition."* – Out-of-home food and drink manufacturer. Reformulation of these drinks was considered particularly challenging, as naturally occurring sugars cannot be removed in the same way as added sugars in soft drinks.

### ***Impact on the wider food and drink industry and in other sectors***



1  
2  
3  
4 A wider threat to other products, particularly those included in the PHE Sugar Reduction  
5  
6  
7 Strategy [37] (another element of the Childhood Obesity Plan that encouraged voluntary  
8  
9  
10 industry reformulation) was discussed. The SDIL demonstrated that the government was  
11  
12  
13 willing to implement policy to regulate the food industry in a way that has not been done  
14  
15  
16 before. Food and drink companies discussed their companies' attempts to reformulate  
17  
18  
19 products not included in the SDIL. The SDIL was described as a rallying call for industry to  
20  
21  
22 improve the healthfulness of products. It was also perceived to cause a ripple effect not just  
23  
24  
25 regarding health but also sustainability, environment, media and promotions. *"Yeah, I think*  
26  
27  
28 *there is a ripple effect. So, I think it can be both positive and negative. I think in terms of*  
29  
30  
31 *positive, I think it can force companies to reformulate and be more innovative in driving the*  
32  
33  
34 *use of other ways of sweetening products" - Food and drink manufacturer*  
35  
36  
37  
38  
39  
40  
41  
42  
43  
44

#### ***Proposal to reverse the SDIL***

45  
46  
47 Comments made by Boris Johnson in his leadership campaign to become prime minister  
48  
49  
50 (July 2019), suggested he might consider repealing the SDIL [38]. These were not taken well  
51  
52  
53 by some participants; who indicated that companies had invested heavily in implementing the  
54  
55  
56 levy *"I suppose it does feel like a backtrack [reversing the SDIL]. Like we've made all this*  
57  
58  
59  
60

1  
2  
3  
4 *work and it was at the time quite painful in the sense of it was such a massive change through*  
5  
6  
7 *the supply chain so there was so many things to think about" – Out-of-home food and drink*  
8  
9  
10 *manufacturer.* However, some participants suggested that reversing the SDIL would be well  
11  
12  
13 tolerated. *"I think, yeah, the industry would be happy to see the back of it because it's just*  
14  
15  
16 *cumbersome, it's just something, it's just another thing to administer." - Food and drink*  
17  
18  
19 *manufacturer.*

## 27 Discussion

### 30 Summary

31  
32  
33 Senior industry perspectives on the SDIL are described in five main themes. Theme 1: *A*  
34  
35  
36 *level playing field...for some*, Theme 2: *Complex to implement, but no lasting negatives*,  
37  
38  
39  
40 Theme 3: *Why us? – the SDIL unfairly targets the drinks industry*, Theme 4: *The consumer is*  
41  
42  
43 *king*, and Theme 5: *The future of the SDIL*. The SDIL appeared to create a level playing field  
44  
45  
46  
47 which industry accepted, however, this was perceived as inadequate due to the exclusion of  
48  
49  
50 milk-based drinks and targeting only SSBs, giving some a competitive advantage.  
51  
52  
53  
54 Implementation of the SDIL was time consuming and complex, leading to high financial  
55  
56  
57 investment to prepare for it. Strategic response to the SDIL was dependent on leadership buy-  
58  
59  
60

1  
2  
3  
4 in and particularly governed by potential consumer responses to product changes associated  
5  
6  
7 with the policy. The announcement and subsequent implementation of the SDIL caused a  
8  
9  
10 ripple effect beyond the soft drinks industry. The wider food and drink industry perceived it  
11  
12  
13 as evidence of the government being willing to regulate to help achieve health goals.  
14  
15  
16  
17  
18  
19

### 20 *Strengths and limitations*

21  
22  
23 The use of elite interviewing techniques to build relationships with and solicit meaningful  
24  
25  
26 responses from participants is a strength of this work. These techniques allowed us to obtain  
27  
28  
29 the views of senior professionals from commercial organisations who have often been  
30  
31  
32 difficult to recruit to other studies [39]. As evident from the challenges described in the out-  
33  
34  
35 of-home sector and supermarkets, including respondents outside of manufacturing allowed  
36  
37  
38 wider exploration of the systemic impacts of the SDIL. A limitation of this work, however, is  
39  
40  
41 that interviews were carried out over a long period of time due to challenges in recruitment.  
42  
43  
44  
45 Therefore, not all participants experienced the same political context, such as Boris Johnson's  
46  
47  
48 threats to reverse the SDIL in July 2019. Initial plans were for longitudinal data collection  
49  
50  
51 repeated across the time period of the study. Had all participants been interviewed closer to  
52  
53  
54 the implementation of the SDIL in 2018, then repeated in 2020, perspectives on the political  
55  
56  
57  
58  
59  
60

1  
2  
3  
4 events occurring would have been captured from all participants. Unfortunately, challenges to  
5  
6  
7 recruitment and access to elite participants led to the abandonment of this plan. Although  
8  
9  
10 researcher neutrality was expressed to participants the position of interviewers as public  
11  
12  
13 health academics could have led to these recruitment challenges.  
14

15  
16  
17  
18  
19  
20 The positionality of the researchers may also have led to censoring of responses by some  
21  
22  
23 participants. Whilst we sought to descriptively represent industry perspectives, as well as  
24  
25  
26 acknowledge our own biases that are typically pro-health policy, it is important to  
27  
28  
29 acknowledge that the food and drink industry will have their own biases against health policy  
30  
31  
32 that is detrimental to their business survival, as evidenced in previous work [40,41]. Although  
33  
34  
35 it was not the aim of the work to explore participant responses in relation to the commercial  
36  
37  
38 determinants of health, it is possible that participant responses did not represent the reality of  
39  
40  
41 what occurred behind the scenes in the food and drink industry in relation to the SDIL.  
42  
43  
44

45  
46  
47 Overlap between some of the responses provided in this work and the 'typical' responses  
48  
49  
50 explored by other researchers as an industry 'playbook' [42] may support this assertion.  
51  
52  
53

### 54 55 56 57 *Interpretation and implications* 58 59 60

1  
2  
3  
4 Interviewees reported that the technical aspects of drink production, particularly in the out-of-  
5  
6  
7 home sector, were not adequately accounted for in the design of the SDIL. An unintended  
8  
9  
10 consequence of the milk-based drink exclusion, led to some organisations having to interpret  
11  
12  
13 the particulars of the SDIL whilst their queries to HMRC went unanswered. Experiences of  
14  
15  
16 participants in this work align with findings that UK Government policy is set up poorly for  
17  
18  
19 the purposes of adequate monitoring and evaluation [43]. Future policy should engage with  
20  
21  
22 the wider food and beverage sector once a policy is certain to be implemented, to design and  
23  
24  
25 communicate technicalities in ways that avoid industry having to interpret themselves what is  
26  
27  
28 required and provide timely responses to queries surrounding implementation. Further,  
29  
30  
31 respondents indicated that lobbying against the inclusion of milk-based sugar sweetened  
32  
33  
34 beverages in the SDIL resulted in this exclusion. Alongside policy engagement in the  
35  
36  
37 technicalities of production, an avenue for future research would be to understand in more  
38  
39  
40 detail the policy process surrounding the SDIL, particularly the influence of the food and  
41  
42  
43  
44  
45  
46  
47  
48  
49  
50  
51  
52  
53  
54  
55  
56  
57  
58  
59  
60

54 Reviewing their product portfolio was also discussed, where assessments of the product mix  
55  
56  
57 as a whole and by individual product were conducted when determining the response to the  
58  
59  
60

1  
2  
3  
4 SDIL. This aligns with previous findings that soft drink companies monitor their internal and  
5  
6  
7 external contexts to determine their products' market position in response to a stimulus such  
8  
9  
10 as the SDIL, and then respond with marketing or non-marketing activity to influence the  
11  
12  
13 purchasing of soft drinks [44]. A crucial external contextual component to response in our  
14  
15  
16 findings appears to be consumer response and preferences towards each product, as well as  
17  
18  
19 health as a whole.  
20  
21  
22  
23  
24  
25  
26

27 The UK soft drinks industry was reformulating products to lower sugar alternatives several  
28  
29 years before the SDIL was introduced [44,45]. Perspectives expressed by participants align  
30  
31  
32 with this and suggest that there is a shift towards healthier drinks as the primary offer for  
33  
34  
35 consumers, with the SDIL accelerating the pace of this change. Consumer preferences for  
36  
37  
38 healthier products, and our finding that industry prioritises these health preferences in their  
39  
40  
41 decision making, are likely to have triggered the soft drinks industry to reformulate products  
42  
43  
44 prior to the announcement of the SDIL. The advocacy (e.g. Jamie Oliver and Action on  
45  
46  
47 Sugar) in the early 2010s [46–48] and government threats to regulate industry [49] may have  
48  
49  
50 also increased consumer awareness about the health impact of sugar consumption and had a  
51  
52  
53  
54  
55  
56  
57 'signalling effect' to consumers to reduce their sugar consumption [50]. Participants in our  
58  
59  
60

1  
2  
3  
4 study suggested that the SDIL was adopted by the Government because of the existing  
5  
6  
7 popularity of sugar reduction among the public. It is likely that the UK public was aware that  
8  
9  
10 SSBs harm health much earlier than the policy announcement, resulting from media activity,  
11  
12  
13 such as that related to Jamie Oliver's campaigning [46] PHE's [47] and WHO's reports on  
14  
15  
16 sugar [48]. Therefore, the importance of public momentum towards health could be regarded  
17  
18  
19 as a trigger for industry action independently from encouraging government action via policy.  
20  
21  
22  
23  
24  
25  
26

27 Finally, participants expressed concern that policies introduced to combat obesity and other  
28  
29  
30 societal issues should be complementary not contradictory. The proposed ban on TV and  
31  
32  
33 online advertising of high fat, salt and sugar (HFSS) products by the UK Government [36]  
34  
35  
36 was viewed by industry to be misguided as they stated it may stop them being able to  
37  
38  
39 advertise their reformulated products; not just those impacted by the SDIL but products  
40  
41  
42 voluntarily reformulated which would still be classified as HFSS. Stakeholder requests for  
43  
44  
45 consistency across policy areas was also expressed by interviewees regarding this advertising  
46  
47  
48 ban [51]. This indicates that a more consistent approach to determining which products  
49  
50  
51 government wants industry to change would help ensure policies do not undermine one  
52  
53  
54  
55  
56  
57 another and build trust in government amongst industry.  
58  
59  
60

## *Conclusion*

This study explored food and drink industry perspectives on the SDIL. We found that industry accepted that legislation was useful in levelling the commercially competitive playing field. However, in practice participants stated that the SDIL had not created a 'true' level playing field as little consideration had been given to excluded product categories during policy design. Technical aspects of implementation were not adequately included and led to complexity for out of home retailers. Legislation on SSBs needs to take account of all industry sectors it affects, including out of home retail, as well as the manufacturing sector. Participants stated that only targeting sugary soft drinks was unfair due to the progress already made in the category compared to others (e.g., confectionary). The critical role of consumers in creating momentum towards sugar reduction in SSBs prior to the SDIL announcement, as well as dictating response to the SDIL was discussed. It is hypothesised that pro-health public views could be a useful lever in encouraging positive industry action independently of food and drink regulation. The impact of the SDIL was felt beyond the soft drinks industry, driving other product sectors to reformulate in anticipation of future regulation.



1  
2  
3  
4  
5  
6  
7 **Acknowledgements:** For the purpose of Open Access, the author has applied a Creative  
8  
9  
10 Commons Attribution (CC BY) licence to any Author Accepted Manuscript version arising.  
11  
12  
13  
14  
15  
16

17 **Competing Interests:** None  
18  
19  
20  
21  
22

23 **Contributorship Statement:** Dr. Catrin P Jones: Conceptualization, Methodology, Formal  
24  
25 analysis, Investigation, Data Curation, Writing - Original Draft, Project administration. Dr.  
26  
27 Hannah Forde: Formal analysis, Writing - Review & Editing. Dr Tarra L. Penney:  
28  
29 Conceptualization, Methodology, Investigation, Data Curation, Writing - Review & Editing,  
30  
31 Funding acquisition. Dr. Dolly R. Z. Theis: Formal analysis, Writing - Review & Editing  
32  
33 Prof. Steven Cummins: Conceptualization, Methodology, Formal analysis, Writing - Review  
34  
35 & Editing, Supervision, Funding acquisition. Prof. Jean Adams: Formal analysis, Writing -  
36  
37 Review & Editing, Funding acquisition. Dr. Cherry Law: Formal analysis, Writing - Review  
38  
39 & Editing. Prof. Harry Rutter: Formal analysis, Writing - Review & Editing, Funding  
40  
41 acquisition. Prof. Richard Smith: Formal analysis, Writing - Review & Editing, Funding  
42  
43  
44  
45  
46  
47  
48  
49  
50  
51  
52  
53  
54  
55  
56  
57  
58  
59  
60

1  
2  
3 acquisition. Prof. Martin White: Conceptualization, Methodology, Resources, Supervision,  
4  
5  
6  
7 Project administration, Funding acquisition, Formal analysis, Writing - Review & Editing.  
8  
9  
10

11  
12  
13 **Funding:** This project was funded by the NIHR Public Health Research programme (Grant  
14  
15  
16 Nos. 16/49/01 and 16/130/01). At the time this study was conducted CPJ, MW, ELR, HF,  
17  
18  
19 TLP, DT, JA, OA, SA, were also supported in part by: Programme grants to the MRC  
20  
21  
22 Epidemiology Unit from the Medical Research Council (grant No. MC\_UU\_12015/6 and  
23  
24  
25 MC\_UU\_00006/7); and the Centre for Diet and Activity Research (CEDAR), a UKCRC  
26  
27  
28  
29 Public Health Research Centre of Excellence – funding from the British Heart Foundation,  
30  
31  
32  
33 Cancer Research UK, the Economic and Social Research Council, the Medical Research  
34  
35  
36  
37 Council, the National Institute for Health Research, and the Wellcome Trust, under the  
38  
39  
40 auspices of the UK Clinical Research Collaboration is gratefully acknowledged. HF received  
41  
42  
43  
44 funding for her PhD studentship from the Economic and Social Research Council and Public  
45  
46  
47  
48 Health England, and she has received further discretionary funding from the Economic and  
49  
50  
51 Social Research Council and Murray Edwards College, Cambridge. The views expressed are  
52  
53  
54 those of the authors and not necessarily those of the any of the above-named funders. The  
55  
56  
57  
58  
59  
60

1  
2  
3 funders had no role in study design, data collection and analysis, decision to publish, or  
4  
5  
6  
7 preparation of the manuscript.  
8  
9  
10  
11  
12

13  
14 **Data sharing statement:** The lead author has full access to the data reported in the manuscript.  
15  
16  
17  
18  
19

20  
21 **Ethics approval statement:** The study was approved by the Humanities and Social Science  
22  
23  
24 Ethics Committee at the University of Cambridge, UK. No approval ID was provided by this  
25  
26  
27 committee.  
28  
29  
30  
31  
32

### 33 34 **References**

- 35  
36  
37 1 Afshin A, Sur PJ, Fay KA, *et al.* Health effects of dietary risks in 195 countries, 1990–  
38 2017: a systematic analysis for the Global Burden of Disease Study 2017. *The Lancet*  
39 2019;**393**:1958–72. doi:10.1016/S0140-6736(19)30041-8  
40  
41  
42 2 World Health Organization. Taxes on sugary drinks: Why do it? World Health  
43 Organization 2017.  
44  
45 3 Andreyeva T, Marple K, Marinello S, *et al.* Outcomes following taxation of sugar-  
46 sweetened beverages: a systematic review and meta-analysis. *JAMA Netw Open*  
47 2022;**5**:e2215276–e2215276.  
48  
49  
50 4 Teng AM, Jones AC, Mizdrak A, *et al.* Impact of sugar-sweetened beverage taxes on  
51 purchases and dietary intake: systematic review and meta-analysis. *Obesity Reviews*  
52 2019;**20**:1187–204.  
53  
54  
55 5 Cawley J, Frisvold D. Taxes on sugar-sweetened beverages: Political economy, and  
56 effects on prices, purchases, and consumption. *Food Policy* 2023;**117**:102441.  
57  
58  
59  
60

- 1  
2  
3  
4 6 The World Bank. Global SSB Tax Database. <https://ssbtax.worldbank.org/> (accessed  
5 25 May 2023).  
6  
7 7 HM Revenue & Customs. Soft Drinks Industry Levy.  
8  
9 2016.[https://www.gov.uk/government/publications/soft-drinks-industry-levy/soft-](https://www.gov.uk/government/publications/soft-drinks-industry-levy/soft-drinks-industry-levy#:~:text=from the levy.,Policy objective,to reduce the sugar)  
10 [drinks-industry-levy#:~:text=from the levy.,Policy objective,to reduce the sugar](https://www.gov.uk/government/publications/soft-drinks-industry-levy/soft-drinks-industry-levy#:~:text=from the levy.,Policy objective,to reduce the sugar)  
11 [content](https://www.gov.uk/government/publications/soft-drinks-industry-levy/soft-drinks-industry-levy#:~:text=from the levy.,Policy objective,to reduce the sugar) (accessed 16 Jun 2020).  
12  
13 8 HM Revenue and Customs. Soft Drinks Industry Levy statistics background and  
14 references. 2022.[https://www.gov.uk/government/statistics/soft-drinks-industry-levy-](https://www.gov.uk/government/statistics/soft-drinks-industry-levy-statistics/soft-drinks-industry-levy-statistics-background-and-references)  
15 [statistics/soft-drinks-industry-levy-statistics-background-and-references](https://www.gov.uk/government/statistics/soft-drinks-industry-levy-statistics/soft-drinks-industry-levy-statistics-background-and-references) (accessed 10  
16 Nov 2022).  
17  
18 9 Cabinet Office, Department of Health and Social Care, HM Treasury, *et al.* Childhood  
19 obesity: a plan for action.  
20 2016.[https://www.gov.uk/government/publications/childhood-obesity-a-plan-for-](https://www.gov.uk/government/publications/childhood-obesity-a-plan-for-action)  
21 [action](https://www.gov.uk/government/publications/childhood-obesity-a-plan-for-action) (accessed 8 Apr 2021).  
22  
23 10 Department of Health and Social Care. Childhood obesity: a plan for action, chapter 2.  
24 2018.  
25  
26 11 HM Revenue & Customs. Guidance: Check if you need to register for the Soft Drinks  
27 Industry Levy. 2018.[https://www.gov.uk/guidance/check-if-you-need-to-register-for-](https://www.gov.uk/guidance/check-if-you-need-to-register-for-the-soft-drinks-industry-levy)  
28 [the-soft-drinks-industry-levy](https://www.gov.uk/guidance/check-if-you-need-to-register-for-the-soft-drinks-industry-levy) (accessed 21 May 2023).  
29  
30 12 Gauke D. Budget 2016. 2016. [https://www.gov.uk/government/publications/budget-](https://www.gov.uk/government/publications/budget-2016-documents)  
31 [2016-documents](https://www.gov.uk/government/publications/budget-2016-documents)  
32  
33 13 HM Treasury, Osborne. G. Budget 2016: George Osborne's speech.  
34 2016.<https://www.gov.uk/government/speeches/budget-2016-george-osbornes-speech>  
35 [2016.https://www.gov.uk/government/speeches/budget-2016-george-osbornes-speech](https://www.gov.uk/government/speeches/budget-2016-george-osbornes-speech)  
36 (accessed 6 Apr 2023).  
37  
38 14 Rogers NT, Cummins S, Forde H, *et al.* Associations between trajectories of obesity  
39 prevalence in English primary school children and the UK soft drink industry levy: an  
40 interrupted time series analysis of surveillance data. *medRxiv* Published Online First:  
41 2022. doi:<https://doi.org/10.1101/2022.09.16.22280030>  
42  
43 15 Hilton S, Buckton CH, Patterson C, *et al.* Following in the footsteps of tobacco and  
44 alcohol? Stakeholder discourse in UK newspaper coverage of the Soft Drinks Industry  
45 Levy. *Public Health Nutr* 2019;**22**:2317–28. doi:10.1017/S1368980019000739  
46  
47 16 Economics O. The Economic Impact of the Soft Drinks Levy, Final Report. *London:*  
48 *Oxford Economics* 2016.  
49  
50  
51  
52  
53  
54  
55  
56  
57  
58  
59  
60

- 1  
2  
3  
4 17 Penney TL, Adams J, White M. Industry reactions to the UK Soft Drinks Industry  
5 Levy: Unpacking the evolving discourse from announcement to implementation. *J*  
6 *Epidemiol Community Health (1978)* 2018;**72**:A43. doi:10.1136/jech-2018-  
7 SSMabstracts.88  
8  
9  
10  
11 18 Law C, Cornelsen L, Adams J, *et al.* An analysis of the stock market reaction to the  
12 announcements of the UK Soft Drinks Industry Levy. *Econ Hum Biol*  
13 2020;**38**:100834. doi:10.1016/j.ehb.2019.100834  
14  
15 19 Law C, Cornelsen L, Adams J, *et al.* The impact of UK Soft Drinks Industry Levy on  
16 manufacturers' domestic turnover. *Econ Hum Biol* 2020;:100866.  
17  
18 20 Penney T, Adams J, White M. LB4 Industry reactions to the UK soft drinks industry  
19 levy: unpacking the evolving discourse from announcement to implementation. *BMJ*  
20 2018. A43.1-A43. doi:10.1136/jech-2018-ssmabstracts.88  
21  
22 21 Hilton S, Buckton CH, Katikireddi SV, *et al.* Who says what about sugar-sweetened  
23 beverage tax? Stakeholders' framing of evidence: a newspaper analysis. *The Lancet*  
24 2017;**390**:S44. doi:10.1016/s0140-6736(17)32979-3  
25  
26 22 Buckton CH, Hilton S, Patterson C, *et al.* DID PROPONENTS AND OPPONENTS  
27 OF THE SOFT DRINKS INDUSTRY LEVY USE THE NEWS MEDIA TO  
28 INFLUENCE THE POLICY DEBATE? A QUALITATIVE DISCOURSE  
29 ANALYSIS USING PRACTICAL REASONING. *J Epidemiol Community Health*  
30 (1978) 2018;**72**:A1–2. doi:10.1136/jech-2018-SSMabstracts.2  
31  
32 23 Buckton CH, Patterson C, Hyseni L, *et al.* The palatability of sugar-sweetened  
33 beverage taxation: A content analysis of newspaper coverage of the UK sugar debate.  
34 *PLoS One* 2018;**13**:1–15. doi:10.1371/journal.pone.0207576  
35  
36 24 Forde H, Penney TL, White M, *et al.* Understanding Marketing Responses to a Tax on  
37 Sugary Drinks: A Qualitative Interview Study in the United Kingdom, 2019. *Int J*  
38 *Health Policy Manag* Published Online First: 23 February 2022.  
39 doi:10.34172/ijhpm.2022.5465  
40  
41 25 Braun V, Clarke V. *Successful Qualitative Research: A Practical Guide for Beginners.*  
42 SAGE 2013.  
43  
44 26 White M. Evaluation of the health impacts of the UK Treasury Soft Drinks Industry  
45 Levy (SDIL). 2017;:1–  
46 46.https://www.journalslibrary.nihr.ac.uk/programmes/phr/1613001/#/  
47  
48 27 Harvey WS. Methodological Approaches for Interviewing Elites. *Geogr Compass*  
49 2010;**4**:193–205. doi:10.1111/j.1749-8198.2009.00313.x  
50  
51  
52  
53  
54  
55  
56  
57  
58  
59  
60

- 1  
2  
3  
4 28 Berry JM, Browne W. Validity and Reliability Issues In Elite Interviewing. *PS Polit*  
5 *Sci Polit* 2003;**35**:679–82.  
6  
7 29 Harvey WS. Strategies for conducting elite interviews. *Qualitative Research*  
8 2011;**11**:431–41. doi:10.1177/1468794111404329  
9  
10 30 Goldstein K. Getting in the Door: Sampling and Completing Elite Interviews. *Political*  
11 *Science & Politics* 2002;**35**:669–72. doi:10.1017/S1049096502001130  
12  
13 31 Stephens N. Collecting data from elites and ultra elites: Telephone and face-to-face  
14 interviews with macroeconomists. *Qualitative Research* 2007;**7**:203–16.  
15 doi:10.1177/1468794107076020  
16  
17 32 Braun V, Clarke V. Using thematic analysis in psychology. *Qual Res Psychol*  
18 2006;**3**:77–101.  
19  
20 33 Braun V, Clarke V. Can I use TA? Should I use TA? Should I not use TA? Comparing  
21 reflexive thematic analysis and other pattern-based qualitative analytic approaches.  
22 *Couns Psychother Res* 2020;**37**–47. doi:10.1002/capr.12360  
23  
24 34 Braun V, Clarke V. What can ‘thematic analysis’ offer health and wellbeing  
25 researchers? *Int J Qual Stud Health Well-being* 2014;**9**. doi:10.3402/qhw.v9.26152  
26  
27 35 Department of Health and Social Care. Calorie labelling in the out of home sector:  
28 implementation guidance. 2021.[https://www.gov.uk/government/publications/calorie-](https://www.gov.uk/government/publications/calorie-labelling-in-the-out-of-home-sector/calorie-labelling-in-the-out-of-home-sector-implementation-guidance#:~:text=The%20out%20of%20home%20sector%20is%20generally%20considered%20to%20be,on%20or%20off%20the%20premises)  
29 [labelling-in-the-out-of-home-sector-](https://www.gov.uk/government/publications/calorie-labelling-in-the-out-of-home-sector/calorie-labelling-in-the-out-of-home-sector-implementation-guidance#:~:text=The%20out%20of%20home%20sector%20is%20generally%20considered%20to%20be,on%20or%20off%20the%20premises)  
30 [implementation-](https://www.gov.uk/government/publications/calorie-labelling-in-the-out-of-home-sector/calorie-labelling-in-the-out-of-home-sector-implementation-guidance#:~:text=The%20out%20of%20home%20sector%20is%20generally%20considered%20to%20be,on%20or%20off%20the%20premises)  
31 [guidance#:~:text=The%20out%20of%20home%20sector%20is%20generally%20consi-](https://www.gov.uk/government/publications/calorie-labelling-in-the-out-of-home-sector/calorie-labelling-in-the-out-of-home-sector-implementation-guidance#:~:text=The%20out%20of%20home%20sector%20is%20generally%20considered%20to%20be,on%20or%20off%20the%20premises)  
32 [dered%20to%20be,on%20or%20off%20the%20premises](https://www.gov.uk/government/publications/calorie-labelling-in-the-out-of-home-sector/calorie-labelling-in-the-out-of-home-sector-implementation-guidance#:~:text=The%20out%20of%20home%20sector%20is%20generally%20considered%20to%20be,on%20or%20off%20the%20premises) (accessed 14 Dec 2022).  
33  
34 36 Department for Digital Culture Media & Sport, Department of Health & Social Care.  
35 Introducing a total online advertising restriction for products high in fat, sugar and salt  
36 (HFSS). 2021.[https://www.gov.uk/government/consultations/total-restriction-of-](https://www.gov.uk/government/consultations/total-restriction-of-online-advertising-for-products-high-in-fat-sugar-and-salt-hfss/introducing-a-total-online-advertising-restriction-for-products-high-in-fat-sugar-and-salt-hfss)  
37 [online-advertising-for-products-high-in-fat-sugar-and-salt-hfss/introducing-a-total-](https://www.gov.uk/government/consultations/total-restriction-of-online-advertising-for-products-high-in-fat-sugar-and-salt-hfss/introducing-a-total-online-advertising-restriction-for-products-high-in-fat-sugar-and-salt-hfss)  
38 [online-advertising-restriction-for-products-high-in-fat-sugar-and-salt-hfss](https://www.gov.uk/government/consultations/total-restriction-of-online-advertising-for-products-high-in-fat-sugar-and-salt-hfss/introducing-a-total-online-advertising-restriction-for-products-high-in-fat-sugar-and-salt-hfss) (accessed 6  
39 Jan 2023).  
40  
41 37 Office for Health Improvement and Disparities. Sugar, salt and calorie reduction and  
42 reformulation. 2017.<https://www.gov.uk/government/collections/sugar-reduction>  
43 (accessed 11 Jan 2023).  
44  
45 38 Stewart H. ‘Sin taxes’: Boris Johnson vows to review sugar levy. *The Guardian*.  
46 2019.[https://www.theguardian.com/politics/2019/jul/03/boris-johnson-vows-to-](https://www.theguardian.com/politics/2019/jul/03/boris-johnson-vows-to-review-whether-sugar-tax-improves-health)  
47 [review-whether-sugar-tax-improves-health](https://www.theguardian.com/politics/2019/jul/03/boris-johnson-vows-to-review-whether-sugar-tax-improves-health) (accessed 19 Oct 2022).  
48  
49  
50  
51  
52  
53  
54  
55  
56  
57  
58  
59  
60

- 1  
2  
3  
4 39 Forde H, Penney T, White M, *et al.* A Framework for Understanding Marketing  
5 Responses to a Tax on Sugary Drinks: a Qualitative Interview Study in the United  
6 Kingdom, 2019. *Int J Health Policy Manag* 2022.
- 7  
8  
9 40 Lacy-Nichols J, Marten R, Crosbie E, *et al.* The public health playbook: ideas for  
10 challenging the corporate playbook. *Lancet Glob Health* 2022.
- 11  
12 41 Wiist WH. The corporate play book, health, and democracy: the snack food and  
13 beverage industry's tactics in context. *Sick societies: Responding to the global*  
14 *challenge of chronic disease* 2011;:204–16.
- 15  
16  
17 42 Petticrew M, Katikireddi SV, Knai C, *et al.* 'Nothing can be done until everything is  
18 done': The use of complexity arguments by food, beverage, alcohol and gambling  
19 industries. *J Epidemiol Community Health (1978)* 2017;71:1078–83.  
20 doi:10.1136/jech-2017-209710
- 21  
22  
23 43 Theis D, White M. Is Obesity Policy in England Fit for Purpose? Analysis of  
24 Government Strategies and Policies, 1992–2020. *Milbank Quarterly* 2021;99:126–70.  
25 doi:10.1111/1468-0009.12498
- 26  
27  
28 44 Forde H, Penney T, White M, *et al.* Understanding Marketing Responses to a Tax on  
29 Sugary Drinks: a Qualitative Interview Study in the United Kingdom, 2019. *Int J*  
30 *Health Policy Manag* 2022.
- 31  
32  
33 45 Scarborough P, Adhikari V, Harrington RA, *et al.* Impact of the announcement and  
34 implementation of the UK Soft Drinks Industry Levy on sugar content, price, product  
35 size and number of available soft drinks in the UK, 2015-19: A controlled interrupted  
36 time series analysis. *PLoS Med* 2020;17:e1003025.
- 37  
38  
39 46 Boseley S. Jamie Oliver's Sugar Rush: a crusade to save Britain's health. The  
40 Guardian. 2015.
- 41  
42  
43 47 Tedstone A, Targett V, Allen R. Sugar Reduction: The evidence for action About  
44 Public Health England. *Public Health England* Published Online First:  
45 2015.[www.gov.uk/phe%5Cnwww.facebook.com/PublicHealthEngland](http://www.gov.uk/phe%5Cnwww.facebook.com/PublicHealthEngland)
- 46  
47  
48 48 World Health Organization. Sugars intake for adults and children. 2015.  
49 <https://www.who.int/publications/i/item/9789241549028> (accessed 14 Oct 2022).
- 50  
51  
52 49 Nieburg O. Kellogg shuns 'silver bullet' 30% UK cereals sugar cap.  
53 [bakeryandsnacks.com](http://bakeryandsnacks.com).  
54 2013.[https://www.bakeryandsnacks.com/Article/2013/01/07/Kellogg-shuns-30-sugar-](https://www.bakeryandsnacks.com/Article/2013/01/07/Kellogg-shuns-30-sugar-cap-proposal-for-UK-cereals)  
55 [cap-proposal-for-UK-cereals](https://www.bakeryandsnacks.com/Article/2013/01/07/Kellogg-shuns-30-sugar-cap-proposal-for-UK-cereals) (accessed 6 Jan 2023).  
56  
57  
58  
59  
60

- 1  
2  
3  
4 50 Rose D, Theis Z. What influences government policymaking? The case of childhood  
5 obesity in England. 2022.  
6  
7 51 Forde H, Boyland EJ, Scarborough P, *et al.* Exploring the potential impact of the  
8 proposed UK TV and online food advertising regulations: a concept mapping study.  
9  
10 *BMJ Open* 2022;12. doi:10.1136/bmjopen-2021-060302  
11  
12  
13  
14  
15  
16  
17  
18  
19  
20  
21  
22  
23  
24  
25  
26  
27  
28  
29  
30  
31  
32  
33  
34  
35  
36  
37  
38  
39  
40  
41  
42  
43  
44  
45  
46  
47  
48  
49  
50  
51  
52  
53  
54  
55  
56  
57  
58  
59  
60

For peer review only



# BMJ Open

## Industry views of the UK Soft Drinks Industry Levy: a thematic analysis of elite interviews with food and drink industry professionals, 2018-20

|                                 |                                                                                                                                                                                                                                                                                                                                                                                                                                                                                                                                                                                                                                                                                                                                                                                                                                                                                                                                                                                                             |
|---------------------------------|-------------------------------------------------------------------------------------------------------------------------------------------------------------------------------------------------------------------------------------------------------------------------------------------------------------------------------------------------------------------------------------------------------------------------------------------------------------------------------------------------------------------------------------------------------------------------------------------------------------------------------------------------------------------------------------------------------------------------------------------------------------------------------------------------------------------------------------------------------------------------------------------------------------------------------------------------------------------------------------------------------------|
| Journal:                        | <i>BMJ Open</i>                                                                                                                                                                                                                                                                                                                                                                                                                                                                                                                                                                                                                                                                                                                                                                                                                                                                                                                                                                                             |
| Manuscript ID                   | bmjopen-2023-072223.R2                                                                                                                                                                                                                                                                                                                                                                                                                                                                                                                                                                                                                                                                                                                                                                                                                                                                                                                                                                                      |
| Article Type:                   | Original research                                                                                                                                                                                                                                                                                                                                                                                                                                                                                                                                                                                                                                                                                                                                                                                                                                                                                                                                                                                           |
| Date Submitted by the Author:   | 06-Jul-2023                                                                                                                                                                                                                                                                                                                                                                                                                                                                                                                                                                                                                                                                                                                                                                                                                                                                                                                                                                                                 |
| Complete List of Authors:       | Jones, Catrin; University of Cambridge, MRC Epidemiology Unit<br>Forde, Hannah; University of Cambridge, MRC Epidemiology Unit;<br>University of Oxford, Nuffield Department of Primary Care Health Sciences<br>Penney, Tarra; York University, Global Food System and Policy Research, School of Global Health, Faculty of Health<br>Theis, Dolly; University of Cambridge, MRC Epidemiology Unit<br>Cummins, Steven; London School of Hygiene & Tropical Medicine, Population Health Innovation Lab, Department of Public Health, Environments & Society, Faculty of Public Health and Policy<br>Adams, J; University of Cambridge, MRC Epidemiology Unit<br>Law, Cherry; University of Reading, Department of Agri-Food Economics and Marketing<br>Rutter, Harry; University of Bath Department of Social and Policy Sciences, Social and Policy Sciences<br>Smith, Richard ; University of Exeter, Faculty of Health and Life Sciences<br>White, Martin; University of Cambridge, MRC Epidemiology Unit |
| <b>Primary Subject Heading</b>: | Health policy                                                                                                                                                                                                                                                                                                                                                                                                                                                                                                                                                                                                                                                                                                                                                                                                                                                                                                                                                                                               |
| Secondary Subject Heading:      | Qualitative research                                                                                                                                                                                                                                                                                                                                                                                                                                                                                                                                                                                                                                                                                                                                                                                                                                                                                                                                                                                        |
| Keywords:                       | Health policy < HEALTH SERVICES ADMINISTRATION & MANAGEMENT, Public health < INFECTIOUS DISEASES, QUALITATIVE RESEARCH                                                                                                                                                                                                                                                                                                                                                                                                                                                                                                                                                                                                                                                                                                                                                                                                                                                                                      |
|                                 |                                                                                                                                                                                                                                                                                                                                                                                                                                                                                                                                                                                                                                                                                                                                                                                                                                                                                                                                                                                                             |

SCHOLARONE™  
Manuscripts

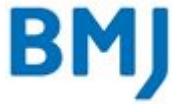

I, the Submitting Author has the right to grant and does grant on behalf of all authors of the Work (as defined in the below author licence), an exclusive licence and/or a non-exclusive licence for contributions from authors who are: i) UK Crown employees; ii) where BMJ has agreed a CC-BY licence shall apply, and/or iii) in accordance with the terms applicable for US Federal Government officers or employees acting as part of their official duties; on a worldwide, perpetual, irrevocable, royalty-free basis to BMJ Publishing Group Ltd ("BMJ") its licensees and where the relevant Journal is co-owned by BMJ to the co-owners of the Journal, to publish the Work in this journal and any other BMJ products and to exploit all rights, as set out in our [licence](#).

The Submitting Author accepts and understands that any supply made under these terms is made by BMJ to the Submitting Author unless you are acting as an employee on behalf of your employer or a postgraduate student of an affiliated institution which is paying any applicable article publishing charge ("APC") for Open Access articles. Where the Submitting Author wishes to make the Work available on an Open Access basis (and intends to pay the relevant APC), the terms of reuse of such Open Access shall be governed by a Creative Commons licence – details of these licences and which [Creative Commons](#) licence will apply to this Work are set out in our licence referred to above.

Other than as permitted in any relevant BMJ Author's Self Archiving Policies, I confirm this Work has not been accepted for publication elsewhere, is not being considered for publication elsewhere and does not duplicate material already published. I confirm all authors consent to publication of this Work and authorise the granting of this licence.

1  
2  
3 **Industry views of the UK Soft Drinks Industry Levy: a thematic analysis of elite interviews**  
4  
5  
6  
7 **with food and drink industry professionals, 2018-20**  
8  
9  
10

11  
12  
13 Dr Catrin P Jones<sup>a\*</sup>, Dr Hannah Forde <sup>a,<</sup>, Dr Tarra L Penney<sup>b</sup>, Dr Dolly Theis <sup>a</sup>, Prof Steven  
14  
15  
16 Cummins<sup>c</sup>, Prof Jean Adams <sup>a</sup>, Dr Cherry Law<sup>d</sup>, Prof Harry Rutter<sup>e</sup>, Prof Rich Smith<sup>f</sup>, Prof  
17  
18  
19  
20 Martin White<sup>a</sup>.  
21  
22  
23  
24  
25  
26

27 a MRC Epidemiology Unit, School of Clinical Medicine, University of Cambridge, United  
28  
29

30 Kingdom  
31  
32

33 b Global Food System and Policy Research, School of Global Health, Faculty of Health,  
34  
35  
36  
37 York University, Canada  
38  
39

40 c Population Health Innovation Lab, Department of Public Health, Environments & Society,  
41  
42  
43 Faculty of Public Health and Policy, London School of Hygiene & Tropical Medicine, United  
44  
45  
46  
47 Kingdom  
48  
49

50 d Department of Agri-Food Economics and Marketing, University of Reading, Reading, UK  
51  
52

53 e Department of Social and Policy Sciences, University of Bath, Bath, UK  
54  
55

56 f Faculty of Health and Life Sciences, University of Exeter, Exeter, UK  
57  
58  
59  
60

1  
2  
3 <Present address: Nuffield Department of Primary Care Health Sciences, University of Oxford, Oxford,  
4  
5  
6 United Kingdom  
7  
8  
9  
10  
11  
12

13 **\*Corresponding Author:** Dr Catrin Pedder Jones, MRC Epidemiology Unit, University of  
14  
15  
16 Cambridge School of Clinical Medicine, Box 285 Institute of Metabolic Science, Cambridge  
17  
18  
19 Biomedical Campus, Cambridge, CB2 0QQ, United Kingdom. [Catrin.jones@mrc-](mailto:Catrin.jones@mrc-epid.cam.ac.uk)  
20  
21  
22 [epid.cam.ac.uk](mailto:Catrin.jones@mrc-epid.cam.ac.uk) +44 (0)1223 769 114  
23  
24  
25

26 **Keywords:** Soft drinks, Soft drinks industry levy, Food and drink industry, sugar sweetened  
27  
28  
29 beverage  
30  
31  
32  
33  
34  
35

36 **Word count:** 6550  
37  
38  
39  
40  
41  
42

### 43 Abstract

44  
45  
46 **Introduction:** The UK Soft Drinks Industry Levy (SDIL), implemented in 2018, has been  
47  
48  
49 successful in reducing the sugar content, and purchasing, of soft drinks, with limited financial  
50  
51  
52 impact on industry. Understanding the views of food and drink industry professionals  
53  
54  
55 involved in reacting to the SDIL is important for policymaking. However, their perceptions  
56  
57  
58 of the challenges of implementation and strategic responses are unknown. The aim of this  
59  
60

1  
2  
3  
4 study therefore was to explore how senior food and drink industry professionals viewed the  
5  
6  
7 **SDIL. *Methods and analysis:*** We undertook a qualitative descriptive study using elite  
8  
9  
10 interviews with 14 senior professionals working in the food and drink industry. Braun and  
11  
12  
13 Clarke's approach to thematic analysis was used to analyse the data, taking an inductive  
14  
15  
16 exploratory and descriptive approach not informed by prior theory or frameworks. Five main  
17  
18  
19 themes were identified: *(1) A level playing field...for some*; Industry accepted the SDIL as  
20  
21  
22 an attempt to create a level playing field but due to the exclusion of milk-based drinks, this  
23  
24  
25 was viewed as inadequate. *(2) Complex to implement, but no lasting negatives*; The SDIL  
26  
27  
28 was complex, expensive and time consuming to implement, with industry responses  
29  
30  
31 dependent on leadership buy-in. *"(3) Why us? – the SDIL unfairly targets the drinks*  
32  
33  
34 *industry"*; soft drinks are an unfair target when other categories also contain high sugar. *"(4)*  
35  
36  
37 *The consumer is king"*; Consumers were a key focus of the industry response to this policy.  
38  
39  
40  
41  
42  
43  
44 *"(5) The future of the SDIL"*; There appeared to be a wider ripple effect, which primed  
45  
46  
47 industry to prepare for future regulation in support of health and environmental sustainability.  
48  
49  
50  
51 ***Ethics and dissemination:*** The study was approved by the Humanities and Social Science  
52  
53  
54 Ethics Committee at the University of Cambridge, UK.  
55  
56  
57  
58  
59  
60

## Strengths and Limitations

- This qualitative study explored how senior food and drink industry professionals viewed the SDIL.
- We undertook elite interviews with 14 professionals working in the food and drink industry, who have often been difficult to recruit in other studies.
- Braun and Clarke's thematic analysis taking a descriptive approach was used to analyse the data.
- Elite interviewing methods allow for the building of relationships to elicit meaningful responses from participants.
- Insights from senior food and drink industry professionals illustrate how sugar sweetened beverage taxes might be successfully implemented and improve understanding of industry responses to taxes and other food and drink policies.

## Introduction

Diet-related non-communicable diseases are a major and growing problem, responsible for over 11 million deaths globally each year [1]. Sugar consumption is of particular concern, with the World Health Organization (WHO) recommending member states introduce sugar-sweetened beverage (SSB) taxes [2]. Reviews suggest that they reduce sales of, increase prices of and encourage reformulation of SSBs [3–5] and over 100 SSB taxes have been implemented worldwide covering 52% of the world's population [6]. SSB taxes have a variety of designs with 87% excise taxes [6]. The WHO recommend that a tiered SSB tax be introduced in countries with high administrative capacity, similar to that which has been introduced in the UK [2]. The Soft Drinks Industry Levy (SDIL) was announced on 16<sup>th</sup> March 2016 and implemented in the United Kingdom (UK) on 6<sup>th</sup> April 2018. According to the budget speech by George Osborne, Chancellor of the Exchequer at the time, it was designed to incentivise manufacturers of SSBs to reformulate their products [7] via charging a levy on soft drinks produced by companies when they leave the warehouse or when imported into the country [8]. Integrated in August 2016 as part of the UK Government's Childhood Obesity: A Plan For Action [9], the SDIL consists of two tiers (for particulars of the tax see box 1). A public consultation on the proposals between August - October 2016 set

1  
2  
3  
4 out the plans for the tiers and exclusions as described in Box 1. Few changes were made as a  
5  
6  
7 result of this consultation and the SDIL was given royal assent on 27th April 2017. The  
8  
9  
10 Government published a second chapter of its childhood obesity plan in 2018, which  
11  
12  
13 suggested the SDIL may be extended to milk-based drinks, though this has not yet occurred  
14  
15  
16  
17 [10].  
18  
19  
20  
21  
22  
23  
24  
25  
26  
27  
28  
29  
30  
31  
32  
33

34 **Box 1: Soft Drinks Industry Levy Particulars [7]**

35  
36  
37 **Eligible drinks:**

- 38 •  $\geq 8$  g total sugar per 100 mL charged at 24 pence per litre
- 39
- 40 •  $\geq 5$  g and  $< 8$  g total sugar per 100 mL charged at 18 pence per litre
- 41
- 42
- 43
- 44
- 45
- 46

47 **Exemptions:**

- 48 • Drinks containing more than 75% milk or 1.2% alcohol
- 49
- 50
- 51 • Alcohol substitute drinks
- 52
- 53
- 54
- 55
- 56 • Powdered drinks
- 57
- 58
- 59
- 60



- 100% fruit juices
- Manufacturers selling under one million litres of drinks per year[11]

The SDIL was one of the first SSB fiscal interventions explicitly designed to incentivise reformulation [7,12,13]. This aim was largely achieved, substantially reducing overall SSB sugar content, and inducing a major shift of drinks from the higher levy tier to the lower tier and untaxed bracket between 2016 and 2018 (Scarborough et al., 2020). Reformulation is reflected in purchases of sugar from SSBs, with [14]. Prior to implementation of the SDIL, the food and drinks industry (hereafter referred to as ‘industry’) viewed the SDIL as having a potentially negative impact on profits resulting in job losses [15–17]. A negative stock market reaction to the SDIL announcement was observed, but this only lasted two days [18]. Similarly, a negative impact on company domestic turnover was observed following the announcement of the SDIL, but this resolved by the time of its implementation [19].

Critical to the success of the SDIL is the implementation of and reaction to the regulations by the drink industry. Therefore, it is important to understand perspectives of the industry as well as those who work in it regarding the implementation of such taxes. Previous work has

1  
2  
3 investigated industry perspectives of the SDIL expressed through the news media [15,20–23]  
4  
5  
6  
7 and the views of industry, civil society and academic participants on how marketing changed  
8  
9  
10 in response to the SDIL [24]. A notable gap in the literature, however, is perspectives of the  
11  
12  
13 SDIL from the commercial sector, not communicated publicly through news media nor  
14  
15  
16 focused solely on marketing responses. Important learning can be obtained by exploring the  
17  
18  
19 perspectives of commercial actors involved in responding to regulation. Interviews with  
20  
21  
22  
23 senior members of industry can help examine the impact of the SDIL on both the soft drinks  
24  
25  
26 industry and wider food and drink industry, an avenue not previously explored. This study  
27  
28  
29 therefore aimed to address these knowledge gaps and inform policymaking by exploring the  
30  
31  
32 perspectives of senior industry professionals regarding the UK SDIL.  
33  
34  
35  
36  
37  
38  
39  
40

## 41 **Methods**

### 42 43 *Study Design*

44  
45  
46 This study adopted a qualitative descriptive design involving elite interviews with senior  
47  
48  
49 industry professionals.  
50  
51  
52  
53  
54  
55  
56

### 57 *Methodological Orientation*

58  
59  
60

1  
2  
3  
4 This research took an experiential qualitative approach, within a critical realist position.  
5  
6

7 Participant perspectives and perceptions were prized over researcher interpretations, and  
8  
9

10 reality was derived from our participants' words and meaning, rather than a reality  
11  
12

13 constructed through researchers' interpretation of their words [25]. A descriptive approach  
14  
15

16 was used to explore how the SDIL was viewed from the position of our participants.  
17  
18  
19  
20  
21  
22

### 23 ***Research Team***

24 Prof Martin White (MW), Prof Steven Cummins (SC), Prof Jean Adams (JA), Prof Rich  
25  
26

27 Smith (RS) and Prof Harry Rutter (HR) secured funding for the overall evaluation of the  
28  
29

30 SDIL within which this study formed a part [26]. Interviews were conducted by Postdoctoral  
31  
32

33 Research Associates Dr. Tarra L Penney (TLP) and Dr. Catrin P Jones (CPJ). TLP led the  
34  
35

36 design of data collection and CPJ led the design of the analysis. MW & SC provided  
37  
38

39 guidance on the design of both elements. TLP and CPJ recruited and interviewed participants.  
40  
41

42 CPJ led the analysis with support from Dr Hannah Forde (HF). HF conducted secondary  
43  
44

45 coding to support theme generation and interpretation. All authors previously mentioned, as  
46  
47

48 well as Dr Dolly Theis (DT) and Dr Cherry Law (CL) were involved in data analysis and  
49  
50

51 interpretation, as well as drafting this manuscript.  
52  
53  
54  
55  
56  
57  
58  
59  
60

## *Participants*

Senior professionals from the soft drinks, food and other drinks industries were recruited to this study using purposive and snowball sampling. We adopted 'elite interviewing' methods to maximise involvement of senior professionals in positions of influence within their organisation and with high levels of responsibility [27]. This technique provides a series of strategies to support recruitment of difficult to access key participants, and to ensure the validity and reliability of data [28]. The principles of elite interviewing were used to inform recruitment including stronger emphasis on the maintenance of trust, importance of interview tone of the interview, preparing appropriately, and engaging in and tailoring dialogue relevant to each informant, more so than in traditional interviews [29,30].

Individuals were considered eligible to participate based on the following criteria: a) currently or previously held a high-level industry position (at the managerial, director or chief officer level), b) their organisation and their professional role was directly or indirectly impacted by the SDIL and c) they could provide a novel perspective, determined by their job role or the company they work for not previously heard in our interviews, to ensure a range

1  
2  
3  
4 of views. Recruitment typically involved an email introduction by a member of the team or  
5  
6  
7 informant contact, although CPJ also attended industry food events and recruited face to face.  
8  
9

10 Initial contact was followed by an informal telephone conversation with TLP or CPJ to  
11  
12  
13 discuss the research purpose, team and informant interests and perspectives, ultimately  
14  
15  
16 proceeding to full participation via telephone interview.  
17  
18  
19  
20  
21  
22

### 23 *Data Collection*

24  
25  
26  
27 Telephone interviews were conducted from June 2018 to June 2020. Participant information  
28  
29  
30 sheets were sent to potential participants prior to participating in the informal discussion.  
31  
32  
33 Informed consent was obtained verbally prior to commencement of the formal telephone  
34  
35  
36 interview, which was digitally audio-recorded. Interviews were undertaken using a minimally  
37  
38  
39 structured topic guide containing three broad areas of inquiry: a) Can you tell me about your  
40  
41  
42 role and organization? b) Can you tell me about your sector as a whole? c) What do you  
43  
44  
45 know about the UK Soft Drinks Industry Levy and its impacts? Elite interviewing  
46  
47  
48 necessitates informed and adaptive dialogue [29,31], meaning participants could engage in  
49  
50  
51 ways most relevant to their specific expertise or experiences within these broad areas.  
52  
53  
54  
55

56  
57 Interviews were transcribed verbatim by a trusted external company, and transcripts were  
58  
59  
60

1  
2  
3  
4 checked against the audio files by CPJ to identify any inaccuracies. Transcripts were  
5  
6  
7 anonymised prior to analysis by removing names of people, organisations, and brands.  
8  
9  
10  
11  
12

### 13 *Analysis*

14  
15  
16  
17 Analysis commenced once all interviews had been conducted and transcribed. Braun and  
18  
19  
20 Clarke's thematic analysis was used, taking an inductive exploratory and descriptive  
21  
22  
23 approach not informed by any prior theory or framework [32]. This approach is flexible due  
24  
25  
26 to lack of alignment with specific epistemological and ontological stance [33,34]. Six  
27  
28  
29 analytic steps were conducted: 1) familiarisation, 2) data coding, 3) initial theme generation,  
30  
31  
32  
33 4) theme development and review, 5) theme refining, defining and naming, 6) writing up.  
34  
35  
36  
37  
38  
39

40 CPJ listened to audio files and read transcripts at least twice to become familiar with them,  
41  
42  
43 whilst making notes on initial impressions and patterns (step 1). Following familiarisation,  
44  
45  
46  
47 CPJ worked systematically through the entire data set and conducted complete coding of all  
48  
49  
50 data, in which segments of data were given a label to describe their area of interest. Coding  
51  
52  
53  
54 was supported by NVivo software version 12. Semantic codes were derived directly from  
55  
56  
57 participants' speech or codes where phrases of speech were brief enough to be directly coded  
58  
59  
60

1  
2  
3  
4 (step 2). CPJ then sorted these initial codes into concise categories (overarching codes),  
5  
6  
7 which clearly described the content of the data (step 3). A reflective diary was kept  
8  
9  
10 throughout the coding process by CPJ to note reflections on findings and to ensure a data-  
11  
12  
13 driven analytic process. Please see supplementary file 1 for a detailed account of reflexivity.  
14  
15  
16

17  
18  
19  
20 HF also familiarised themselves with the transcripts (step 1) and then examined CPJ's coding to  
21  
22  
23 ensure the codes were data driven with as little interpretation as possible (step 2). CPJ then  
24  
25  
26 collated codes that shared a common pattern into themes (step 3). Again, CPJ and HF met to  
27  
28  
29 discuss and refine the themes to ensure they were descriptive with minimal interpretation  
30  
31  
32  
33 (step 4).  
34  
35  
36  
37  
38  
39

40 A document containing themes, codes within them, and extensive anonymised quotes was  
41  
42  
43 shared with all co-authors in two phases: phase 1 March 2022 and phase 2 October 2022  
44  
45  
46 (step 5). This data clinic aimed to minimise researcher interpretation. A document presented  
47  
48  
49 theme descriptions and asked co-authors to answer the following questions for each theme: 1)  
50  
51  
52  
53 Is the theme descriptive? 2) Does the theme represent the data accurately? 3) What do you  
54  
55  
56 think the theme tells us about the SDIL from the perspective of industry? JA, DT, CL  
57  
58  
59  
60

1  
2  
3 completed the data clinic document in phase 1. Themes were amended based on their  
4  
5  
6 reflections and the document updated in October 2022. SC, MW, HR & RS completed the  
7  
8  
9 data clinic form in phase 2. Final themes and the manuscript were written up by CPJ and  
10  
11  
12  
13 reviewed by all co-authors (step 6).  
14  
15  
16  
17  
18  
19

### 20 *Patient and Public Involvement Statement*

21  
22  
23 This study is part of the 'Evaluation of the health impacts of the UK Treasury Soft Drinks  
24  
25  
26 Industry Levy (SDIL)' funded by NIHR ([award no. 16/130/01](#)). Project oversight is provided  
27  
28  
29 by an independent study steering committee (ISSC) which contains members of the public.  
30  
31  
32  
33 The ISSC for the overall project met biannually from 2017 – 2023 and were asked to provide  
34  
35  
36  
37 advice on methodology as well as interpretation of our findings.  
38  
39  
40  
41  
42  
43

### 44 **Results**

45  
46  
47 Fourteen participants were recruited (Table 1). Participants' roles within organisations were  
48  
49  
50 diverse; chief officers, directors, and managers with overall responsibility or with specialist  
51  
52  
53 responsibilities for finance, strategy, operations, marketing, public relations or nutrition.  
54  
55  
56  
57 Interviews ranged in length from 26 to 62 minutes. Six additional participants were  
58  
59  
60



1  
2  
3 approached and took part in informal discussions; three did not participate due to scheduling  
4  
5  
6  
7 issues, and three refused to take part. Five inductively derived, interlinked themes and 15  
8  
9  
10 subthemes were identified (Box 2).  
11  
12  
13  
14  
15  
16  
17  
18  
19  
20  
21  
22  
23

24 Table 1: Participant details  
25

| Sector Category                           | N |
|-------------------------------------------|---|
| Drink manufacturers                       | 4 |
| Food and drink manufacturers              | 3 |
| Supermarkets                              | 3 |
| Industry associations                     | 1 |
| Out-of-home* food and drink manufacturers | 1 |
| Out-of-home retailers                     | 1 |
| Advertising consultants                   | 1 |

26  
27  
28  
29  
30  
31  
32  
33  
34  
35  
36  
37  
38  
39  
40  
41  
42  
43  
44  
45  
46  
47  
48  
49  
50  
51  
52  
53  
54  
55  
56  
57  
58  
59  
60

\*\* *“The out-of-home sector is generally considered to be any outlet where food or drink is prepared in a way that means it is ready for immediate consumption, on or off the premises”*[35]

Box 2: Theme and sub-theme summary.

1  
2  
3  
4 Theme 1: A level playing field...for some

5 *The SDIL created a level playing field*

6 *Milk-based drinks increased the complexity in the out-of-home sector*

7 *Challenges for supermarkets with large product portfolios*

8  
9  
10  
11 Theme 2: Complex to implement but no lasting negative effects

12 *Complexities in strategic response – price and product are key*

13 *Global companies and internal systems*

14 *Contradictory government messaging*

15 *Leadership buy-in dictates strategic response*

16 *Few long-lasting negative effects & SDIL provided opportunities*

17  
18  
19  
20  
21  
22  
23 Theme 3: Why us? – The SDIL unfairly targets the drinks industry

24 *Sugary drinks in isolation were unfair targets for regulation*

25 *Distrust of government's motivations to introduce the SDIL*

26  
27  
28  
29 Theme 4: Consumer is king

30 *Consumer response to product changes resulting from the SDIL*

31 *Consumer momentum towards healthier products*

32  
33  
34  
35 Theme 5: The future of the SDIL

36 *Extending to milk and fruit-based drinks*

37 *Impact on the wider food and drink industry and on other sectors*

38 *Proposal to reverse the SDIL*

39  
40  
41  
42  
43  
44  
45  
46  
47  
48

49 ***Theme 1: A level playing field...for some***

50  
51  
52 ***The SDIL created a level playing field***

53  
54  
55 Industry professionals accepted that the SDIL helped create a level playing field, where no

56  
57  
58 organisation lost out by taking action on health that their competitors did not "... *legislation*

1  
2  
3  
4 *level playing fields is so important and that's why with these big public health*  
5  
6  
7 *initiatives...I'm actually really quite pro government intervention" – Supermarket. Soft*  
8  
9  
10 drinks manufacturers also discussed that the two years to prepare for the implementation of  
11  
12  
13 the SDIL was sufficient and they were happy they could develop an adequate response within  
14  
15  
16 that time. *"I'm not aware of any significant implementation or challenges that our members*  
17  
18  
19 *have encountered, I mean they did have time to adapt, the legislation was published in good*  
20  
21  
22 *time to allow them to understand exactly what they would be required to do" – Trade*  
23  
24  
25  
26  
27 *association*  
28  
29  
30  
31  
32  
33

34 However, participants also stated that a lack of understanding and consultation from  
35  
36 government meant a 'true' level playing field for all sectors involved in the sales of sugary  
37  
38 drinks had not been not achieved *"...you want to really do it smartly so everybody feels*  
39  
40  
41 *they're 100% equally affected and you don't get this... 'my product is in scope, your product*  
42  
43  
44 *is out of scope'...it doesn't create the sense of unilateral 'let's do this'... which is what it*  
45  
46  
47 *should be, if that makes sense" – Food and drink manufacturer. The lack of consultation by*  
48  
49  
50  
51 the government with sectors who were not soft drinks manufacturers (for example out of  
52  
53  
54 home retailers) and the exclusion of milk-based sugary drinks led to this perception *"...milk-*  
55  
56  
57  
58  
59  
60

1  
2  
3  
4 *based drinks often carried bigger serving sizes and had more total sugar in them than any of*  
5  
6  
7 *our products would. They were excluded from the levy as well which looked like a big*  
8  
9  
10 *shortcoming.” Drink manufacturer.*  
11  
12  
13  
14  
15  
16

17 ***Milk-based drinks increased the complexity in the out-of-home sector***  
18

19  
20 Interviewees explained that, from their perspective, the government did not think clearly  
21  
22  
23 about the technical implications for retailers and out-of-home sector and that it was easier for  
24  
25  
26 soft drink manufacturers to respond to the levy than it was for other industry actors “...I  
27  
28  
29 *don’t think they understood the ways of working and the preparation methods in the out-of-*  
30  
31  
32  
33 *home sector...” – Out-of-home food and drink manufacturer. A high level of complexity*  
34  
35  
36 within the out-of-home sector to manufacture and produce drinks for immediate consumption  
37  
38  
39 led to higher implementation costs; specifically, the exclusion of milk-based drinks and  
40  
41  
42  
43 specification around eligibility of drinks mixed with carbon dioxide, water and ice, and those  
44  
45  
46 with and without milk. “...they were looking at the likes of drinks fountains for carbonated  
47  
48  
49 *soft drinks because... a bag and box syrup, they would be mixed with ice or carbon dioxide*  
50  
51  
52  
53 *to give the carbonation or either they could be mixed with water and that would capture those*  
54  
55  
56  
57 *drinks in the out-of-home sector, but there was a vagueness to milk-based drinks” – Out-of-*  
58  
59  
60

1  
2  
3  
4 *home food and drink manufacturer*. Some queries to Her Majesty's Revenue and Customs  
5  
6  
7 (HMRC – the tax collecting authority in the UK) went unanswered, thus, the out-of-home  
8  
9  
10 sector had to interpret the legislation themselves and apply the SDIL according to their  
11  
12  
13 interpretation. Representatives of the out-of-home sector did not perceive two years as  
14  
15  
16 enough time to have prepared due to confusion surrounding eligibility. In contrast, soft drinks  
17  
18  
19 manufacturers stated they had had time to prepare.  
20  
21  
22  
23  
24  
25  
26

### 27 ***Challenges for supermarkets with large product portfolios***

28  
29  
30 Supermarkets felt disadvantaged compared to soft drink manufacturers by the complexities of  
31  
32  
33 their sector. They highlighted sector-specific challenges to adapting to the SDIL, including  
34  
35  
36 that their product portfolio not only contains branded drinks, about which they have to make  
37  
38  
39 decisions, but also private label (own brand) drinks “...*what branded suppliers chose to do*  
40  
41  
42 *was their choice...different brands choosing to reformulate, resize or inflate, which I think*  
43  
44  
45 *led to a fair bit of customer confusion as to what the hell was going on.* “ – Supermarket. It  
46  
47  
48 was described as challenging and time consuming to manage such a large portfolio and make  
49  
50  
51 decisions on each product. Particularly as reformulation decisions and portion size reduction  
52  
53  
54 reportedly differed between brands yet had to be merchandised together within stores.  
55  
56  
57  
58  
59  
60

1  
2  
3  
4 Retailers also felt that they were disadvantaged as their customers expressed confusion at  
5  
6  
7 differing responses by different brands – e.g. ‘sugary’ drinks reformulated to just below the  
8  
9  
10 SDIL threshold but containing both sugar and sweeteners confused customers, with queries  
11  
12  
13 directed at retailers rather than drinks manufacturers “... we tried to make it as clear for  
14  
15  
16 customers by putting on all the [shelves] sugar levy applied, so they could very much  
17  
18  
19 see...But... when they see a sugar line that’s not [included in the SDIL], that’s when the  
20  
21  
22 questions start coming.” – Supermarket.  
23  
24  
25

## 26 27 28 29 30 ***Theme 2: Complex to implement but no lasting negative effects***

### 31 32 33 ***Complexities in strategic response – price and product are key***

34  
35  
36 Industry responded to the SDIL by reviewing product portfolios and strategically selecting  
37  
38  
39 responses at the individual product level. This portfolio review approach is why responses  
40  
41  
42 differed between companies and between products. Research and development (R&D) and  
43  
44  
45 consumer testing were costly for industry during this process, and, linking to theme 1, there  
46  
47  
48 were increased costs for those companies with larger product portfolios (e.g. supermarkets).  
49  
50  
51  
52  
53 For the out-of-home sector, additional complications were noted due to confusion over  
54  
55  
56 eligibility of some milk-based drinks “...government is very keen to always say “oh just  
57  
58  
59  
60

1  
2  
3  
4 *reformulate, it will be easy” but it’s not easy. It actually takes a lot of time and investment.” –*  
5  
6

7 *Drink manufacturer.*  
8  
9  
10  
11  
12

13 Consumer testing was vital during the reformulation and decision-making process and  
14  
15  
16  
17 consumer preference dictated the strategy taken “... *we invested a significant amount of*  
18  
19  
20 *money...in developing lots and lots of different formulations with lower sugar to see and*  
21  
22  
23 *testing them with consumers in Great Britain to see whether those recipes... would be*  
24  
25  
26 *acceptable to consumers.” – Drink manufacturer. An additional challenge in reformulating*  
27  
28  
29  
30 drinks described by manufacturers was that sugar serves a functional purpose, in the  
31  
32  
33  
34 mouthfeel of drinks mixed with ice and to prevent ‘brain freeze’, as well as to provide  
35  
36  
37 sweetness “*Because, actually, yes, we could stick sweeteners in everything, but, actually,*  
38  
39  
40 *sugar also has like a functional role” – Out-of-home retailer.*  
41  
42  
43  
44  
45  
46

47 Packaging, merchandising and placement were challenges to overcome, particularly for  
48  
49  
50 supermarkets. Decisions were made on own brand products but also on how to retail other  
51  
52  
53  
54 branded products with different responses to the SDIL (e.g. reformulated drinks, reduced and  
55  
56  
57 increased portion sizes, rebranding) “...*there were a number of products that didn’t*  
58  
59  
60

1  
2  
3 reformulate but did drop size. So, again, there's just small considerations in that around how  
4  
5  
6  
7 you merchandise it... So what sounds like a relatively simple change, of dropping from  
8  
9  
10 330ml to, I don't know, 250ml, in reality kind of that complexity flows back through the  
11  
12  
13  
14 value chain" – Supermarket.

### Leadership buy-in dictates strategic response

15  
16  
17  
18  
19  
20  
21  
22  
23 Leadership buy-in to health, where senior management 'buy-in' to the idea that their  
24  
25  
26  
27 company should be making pro-health decisions, was discussed as vital in dictating the  
28  
29  
30 strategic response to the SDIL "... I think such a review requires strong leadership and ... our  
31  
32  
33  
34 COO was very clear that we needed to step in and we needed to do, you know, do the  
35  
36  
37 responsible, brave thing." -Drink manufacturer. Participants described this buy-in as making  
38  
39  
40 the process simpler and a lack of buy-in as a barrier to making timely progress "... having  
41  
42  
43 that strong leadership and, you know, complete buy-in from the top team and actually pretty  
44  
45  
46  
47 much all the other levels of the organisation, then it's actually quite simple" – Drink  
48  
49  
50 manufacturer.

### Global companies and internal systems



1  
2  
3  
4 The cost of setting up internal systems to account for and pay the SDIL was expensive, due to  
5  
6  
7 the requirement to report to HMRC, regardless of whether or not a company involved in the  
8  
9  
10 manufacture or selling of soft drinks was liable to pay the levy “...*It’s ridiculous that, you*  
11  
12  
13 *know, it’s cost us half a million pounds just to tell Treasury that actually we don’t need to*  
14  
15  
16 *pay it.*” – *Drink manufacturer*. The global nature of many of these companies was an  
17  
18  
19 additional challenge. Response strategies appropriate for a UK market may not be  
20  
21  
22 transferable to other countries, for example reformulation recipes vary due to differences in  
23  
24  
25 consumer palate and storage temperatures/facilities “...*that’s [computer system] for the UK,*  
26  
27  
28 *and then Ireland have a separate system, France have a separate system, Mexico have a*  
29  
30  
31 *separate system.* “ – *Food and drink manufacturer*.

### 40 ***Contradictory government messaging***

41  
42  
43  
44 There was confusion over whether manufacturers needed to pass on price increases to change  
45  
46  
47 consumer behaviour due to contradictory government messaging over the aim of the SDIL.  
48  
49  
50 Participants indicated that they thought price increases should have been passed on to target  
51  
52  
53 individual behaviour change; however, manufacturers stated they had no control over  
54  
55  
56 whether this occurred as retailers set the price for consumers “...*[the] government had*  
57  
58  
59  
60

1  
2  
3  
4 *slightly mixed messages so it was pretty clear from the Department of Health and PHE*

5  
6  
7 [Public Health England] ... *that they expected to see prices passed on ... I think the Treasury*  
8  
9  
10 *were trying to say, oh soft drinks manufacturers don't have to pass this on... Well, apart from*  
11  
12  
13 *the fact that most businesses won't absorb a cost if they can avoid it for obvious reasons, it*  
14  
15  
16  
17 *was the opposite of what the Health Department and others wanted...* – Drink manufacturer.  
18  
19

### 20 21 22 23 ***Few long-lasting negative effects & SDIL provided opportunities***

24  
25  
26  
27 Participants acknowledged that the SDIL did achieve its aim in stimulating product  
28  
29  
30 reformulation to avoid the levy. Although implementation was complex and costly, as  
31  
32  
33 previously illustrated, there were few long-lasting negative effects. Some participants  
34  
35  
36 suggested the SDIL provided opportunities *“I think some of them would have switched back*  
37  
38  
39 *but we've gained new consumers as well which is, you know, how we, which through*  
40  
41  
42 *sampling and advertising essentially.”* – Drink manufacturer. However, participants were  
43  
44  
45  
46  
47 sceptical that the SDIL would achieve intended reductions in childhood obesity in the UK.  
48  
49  
50  
51 *“... why [the SDIL] it was thought that that would be a, that policy in isolation would be*  
52  
53  
54 *sufficient to reduce obesity rates.”* – Drink manufacturer.  
55  
56  
57  
58  
59  
60

1  
2  
3  
4 ***Theme 3: Why us? – The SDIL unfairly targets the drinks industry***  
5

6  
7 ***Sugary drinks in isolation were unfair targets for regulation***  
8  
9

10 Participants felt that the SDIL unfairly targets the soft drinks industry. Participants expressed  
11  
12 their frustration that a single food category was targeted when other food categories bear a  
13  
14 significant proportion of the responsibility for childhood obesity. They expressed the view  
15  
16 that multiple nutrients or calories across many food and drink sectors should be targeted by  
17  
18 regulation if the government is serious about reducing childhood obesity, particularly as  
19  
20 substitution to other non-regulated food categories could negate the impact of the SDIL on  
21  
22 health "...why would it be just the soft drink levy, why would you not target cakes and  
23  
24 biscuits...that's what we didn't understand at the time." - Food and drink manufacturer..  
25  
26  
27  
28  
29  
30  
31  
32  
33  
34  
35  
36  
37  
38  
39

40 There was consensus among participants that it did not make sense for the government to  
41  
42 target a category that they considered was already reducing sugar faster than other food  
43  
44 categories. Although the SDIL had accelerated the reformulation progress for some, this was  
45  
46 stated to be already occurring prior to the SDIL announcement. Participants expressed the  
47  
48 view that the sector had been unfairly penalised, and that sectors which reformulate should be  
49  
50 praised rather than targeted by regulation when other unregulated categories have contributed  
51  
52  
53  
54  
55  
56  
57  
58  
59  
60

1  
2  
3 little towards achieving health goals. "... *the soft drinks category was already well embarked*  
4  
5  
6  
7 *on the journey to reformulation...part of the industry's disappointment and frustration about*  
8  
9  
10 *the announcement of the levy was that they were already absolutely going to deliver what the*  
11  
12  
13 *levy has now kind of made them deliver"* – Trade association

### ***Distrust of government's motivations to introduce the SDIL***

23 Participants stated that the SDIL was politically motivated, not an evidence-based policy.

26 Government policies targeting obesity were described as contradictory and not aligned with

29 one another, particularly the proposed ban on advertising of less healthy foods on TV and

32 online [36]. According to participants, the advertising ban does not distinguish between

35 reformulated and non-reformulated products, and acts as a disincentive to spending on

38 reformulation if they cannot recoup their investment through advertising new products. "*So if*

41 *you can take something from 40g of sugar to 20g of sugar but you'd only advertise on TV is*

44 *it's 5(g), then why bother, right, and it also means that they can't tell the world, look at this*

47 *amazing thing we've done, we've reformulated this"* – Advertising consultant.

1  
2  
3 Perceived disconnectedness between policies led to distrust in the government and a belief  
4  
5  
6  
7 that government obesity policy is poorly planned. Distrust was compounded by some  
8  
9  
10 companies appearing to be successful at lobbying the government following the  
11  
12  
13 announcement, resulting in changes to the regulations as a result of this lobbying, rather than  
14  
15  
16 on the basis of health or nutrition, in particular the decision to exclude milk-based drinks.

17  
18  
19  
20 Participants stated this was motivated by some companies being able to gain a competitive  
21  
22  
23 advantage, as some milk-based drinks have higher sugar content than soft drinks. Participants  
24  
25  
26 also referred to the SDIL as a political tool to distract from other things in the budget in  
27  
28  
29 which it was announced "... *I think this was a decision taken within the Treasury by quite a*  
30  
31  
32  
33  
34 *small group of people and it was announced during a Budget by a Chancellor who was trying*  
35  
36  
37 *to distract from some other economic figures that he maybe wasn't too pleased about.*" –

38  
39  
40 *Drink manufacturer.* The fact that the proposal to establish the SDIL had been kept secret,  
41  
42  
43 and the announcement was a shock to many, led to this view. "*I think the timing was a*  
44  
45  
46 *surprise... Yeah and the way it was done without any form of consultation or pre-*  
47  
48  
49 *announcement.*" – *Drink manufacturer.*

50  
51  
52  
53  
54  
55  
56  
57 ***Theme 4: Consumer is king***  
58  
59  
60

### *Consumer response to product changes resulting from the SDIL*

Industry participants discussed throughout all previous themes that meeting the wishes of consumers was the priority when responding to the SDIL. Taste preferences and tolerance of reformulation changes were critical and companies expressed concerns that consumers might dislike reformulated products if they changed dramatically in a short time period "... obviously what's critical from our perspective is developing a product that consumers still like the taste of whilst reducing their sugar intake so that we were trying to marry-up those two things." – Drink manufacturer. Company responses to the SDIL, as well as health and environmental issues more broadly, were vital to maintaining brand loyalty and company reputation in the eyes of consumers. The media were seen as influential in shaping consumer preferences and company reputation, as some newspapers had used graphics to show the sugar content of drinks and this was considered to have influenced purchasing patterns. According to informants a small group of very loyal consumers can cause a backlash publicly, which can be picked up by both the news media and social media.

### *Consumer momentum towards healthier products*

1  
2  
3  
4 Participants stated consumer purchasing patterns are changing, with consumers increasingly  
5  
6  
7 choosing lower sugar products, which may also have driven reformulation prior to the SDIL.  
8  
9

10 The policy acted as a catalyst for increasing consumer demand for sugar reduction and some  
11  
12  
13 respondents also highlighted the role of social media in driving these trends. Consumers were  
14  
15  
16 also reported by participants as “moving away from” artificial ingredients, which leads to  
17  
18  
19 challenges in reformulation using non-nutritive sweeteners *"A lot of our consumers like ..., ,*  
20  
21  
22  
23 *they don't want to have sweeteners, they don't want to have preservatives" – Drink*  
24  
25  
26 *manufacturer.* Some participants suggested that consumers were not lost when sugar was  
27  
28  
29 reduced in their favourite products, due to consumer preferences moving towards prioritising  
30  
31  
32 health. It was important to participants and their organisations that consumers have enough  
33  
34  
35 choice and there were concerns that regulation could limit choice from some.  
36  
37  
38  
39  
40  
41  
42  
43

#### 44 ***Theme 5: The future of the SDIL***

45  
46  
47 Participants discussed the potential of expanding the SDIL to fruit and milk-based drinks, the  
48  
49  
50 wider threat to other products, reformulation in other categories, changes in other sectors as a  
51  
52  
53 result of the SDIL and the possibility of its reversal by government.  
54  
55  
56  
57  
58  
59  
60

### ***Extending to milk and fruit-based drinks***

Concerns were expressed over the Chancellor's proposal to extend the SDIL to milk-based and fruit-based drinks at the time of the announcement *"I don't think politicians think it's done. Obviously we've got the review next year on whether milk-based drinks should be included, and then I think it's 2021 when they'll review the levels as well."* – Drink manufacturer. Participants stated the nutritional benefits of these meant that natural sugars (fructose and lactose) should not be subject to the same regulation as soft drinks. The vitamin and mineral content of these drinks was also discussed as a benefit to children who may not be consuming sufficient fruit, vegetables or calcium from other sources *"... Now you have products that are being developed with high levels of sugar in them so that really does need to be addressed but you don't want to go down the route of demonising milk because it is still a great source of nutrition."* – Out-of-home food and drink manufacturer. Reformulation of these drinks was considered particularly challenging, as naturally occurring sugars cannot be removed in the same way as added sugars in soft drinks.

### ***Impact on the wider food and drink industry and in other sectors***



1  
2  
3  
4 A wider threat to other products, particularly those included in the PHE Sugar Reduction  
5  
6  
7 Strategy [37] (another element of the Childhood Obesity Plan that encouraged voluntary  
8  
9  
10 industry reformulation) was discussed. The SDIL demonstrated that the government was  
11  
12  
13 willing to implement policy to regulate the food industry in a way that has not been done  
14  
15  
16 before. Food and drink companies discussed their companies' attempts to reformulate  
17  
18  
19 products not included in the SDIL. The SDIL was described as a rallying call for industry to  
20  
21  
22 improve the healthfulness of products. It was also perceived to cause a ripple effect not just  
23  
24  
25 regarding health but also sustainability, environment, media and promotions. *"Yeah, I think*  
26  
27  
28 *there is a ripple effect. So, I think it can be both positive and negative. I think in terms of*  
29  
30  
31 *positive, I think it can force companies to reformulate and be more innovative in driving the*  
32  
33  
34 *use of other ways of sweetening products" - Food and drink manufacturer*  
35  
36  
37  
38  
39  
40  
41  
42  
43

#### ***Proposal to reverse the SDIL***

44  
45  
46  
47 Comments made by Boris Johnson in his leadership campaign to become prime minister  
48  
49  
50 (July 2019), suggested he might consider repealing the SDIL [38]. These were not taken well  
51  
52  
53 by some participants; who indicated that companies had invested heavily in implementing the  
54  
55  
56 levy *"I suppose it does feel like a backtrack [reversing the SDIL]. Like we've made all this*  
57  
58  
59  
60

1  
2  
3  
4 *work and it was at the time quite painful in the sense of it was such a massive change through*  
5  
6  
7 *the supply chain so there was so many things to think about" – Out-of-home food and drink*  
8  
9  
10 *manufacturer.* However, some participants suggested that reversing the SDIL would be well  
11  
12  
13 tolerated. *"I think, yeah, the industry would be happy to see the back of it because it's just*  
14  
15  
16 *cumbersome, it's just something, it's just another thing to administer." - Food and drink*  
17  
18  
19 *manufacturer.*

## 27 Discussion

### 30 Summary

31  
32  
33 Senior industry perspectives on the SDIL are described in five main themes. Theme 1: *A*  
34  
35  
36 *level playing field...for some*, Theme 2: *Complex to implement, but no lasting negatives*,  
37  
38  
39  
40 Theme 3: *Why us? – the SDIL unfairly targets the drinks industry*, Theme 4: *The consumer is*  
41  
42  
43 *king*, and Theme 5: *The future of the SDIL*. The SDIL appeared to create a level playing field  
44  
45  
46  
47 which industry accepted, however, this was perceived as inadequate due to the exclusion of  
48  
49  
50 milk-based drinks and targeting only SSBs, giving some a competitive advantage.  
51  
52  
53  
54 Implementation of the SDIL was time consuming and complex, leading to high financial  
55  
56  
57 investment to prepare for it. Strategic response to the SDIL was dependent on leadership buy-  
58  
59  
60

1  
2  
3  
4 in and particularly governed by potential consumer responses to product changes associated  
5  
6  
7 with the policy. The announcement and subsequent implementation of the SDIL caused a  
8  
9  
10 ripple effect beyond the soft drinks industry. The wider food and drink industry perceived it  
11  
12  
13 as evidence of the government being willing to regulate to help achieve health goals.  
14  
15  
16  
17  
18  
19

### 20 *Strengths and limitations*

21  
22  
23 The use of elite interviewing techniques to build relationships with and solicit meaningful  
24  
25 responses from participants is a strength of this work. These techniques allowed us to obtain  
26  
27 the views of senior professionals from commercial organisations who have often been  
28  
29 difficult to recruit to other studies [39]. As evident from the challenges described in the out-  
30  
31 of-home sector and supermarkets, including respondents outside of manufacturing allowed  
32  
33 wider exploration of the systemic impacts of the SDIL. A limitation of this work, however, is  
34  
35 that interviews were carried out over a long period of time due to challenges in recruitment.  
36  
37  
38 Therefore, not all participants experienced the same political context, such as Boris Johnson's  
39  
40 threats to reverse the SDIL in July 2019. Initial plans were for longitudinal data collection  
41  
42 repeated across the time period of the study. Had all participants been interviewed closer to  
43  
44 the implementation of the SDIL in 2018, then repeated in 2020, perspectives on the political  
45  
46  
47  
48  
49  
50  
51  
52  
53  
54  
55  
56  
57  
58  
59  
60

1  
2  
3  
4 events occurring would have been captured from all participants. Unfortunately, challenges to  
5  
6  
7 recruitment and access to elite participants led to the abandonment of this plan. Although  
8  
9  
10 researcher neutrality was expressed to participants the position of interviewers as public  
11  
12  
13 health academics could have led to these recruitment challenges.  
14

15  
16  
17  
18  
19  
20 The positionality of the researchers may also have led to censoring of responses by some  
21  
22  
23 participants. Whilst we sought to descriptively represent industry perspectives, as well as  
24  
25  
26 acknowledge our own biases that are typically pro-health policy, it is important to  
27  
28  
29 acknowledge that the food and drink industry will have their own biases against health policy  
30  
31  
32 that is detrimental to their business survival, as evidenced in previous work [40,41]. Although  
33  
34  
35 it was not the aim of the work to explore participant responses in relation to the commercial  
36  
37  
38 determinants of health, it is possible that participant responses did not represent the reality of  
39  
40  
41 what occurred behind the scenes in the food and drink industry in relation to the SDIL.  
42  
43  
44

45  
46  
47 Overlap between some of the responses provided in this work and the 'typical' responses  
48  
49  
50 explored by other researchers as an industry 'playbook' [42] may support this assertion.  
51  
52  
53

### 54 55 56 57 *Interpretation and implications* 58 59 60

1  
2  
3  
4 Interviewees reported that the technical aspects of drink production, particularly in the out-of-  
5  
6  
7 home sector, were not adequately accounted for in the design of the SDIL. An unintended  
8  
9  
10 consequence of the milk-based drink exclusion, led to some organisations having to interpret  
11  
12  
13 the particulars of the SDIL whilst their queries to HMRC went unanswered. Experiences of  
14  
15  
16 participants in this work align with findings that UK Government policy is set up poorly for  
17  
18  
19 the purposes of adequate monitoring and evaluation [43]. Future policy should engage with  
20  
21  
22 the wider food and beverage sector once a policy is certain to be implemented, to design and  
23  
24  
25 communicate technicalities in ways that avoid industry having to interpret themselves what is  
26  
27  
28 required and provide timely responses to queries surrounding implementation. Further,  
29  
30  
31 respondents indicated that lobbying against the inclusion of milk-based sugar sweetened  
32  
33  
34 beverages in the SDIL resulted in this exclusion. Alongside policy engagement in the  
35  
36  
37 technicalities of production, an avenue for future research would be to understand in more  
38  
39  
40 detail the policy process surrounding the SDIL, particularly the influence of the food and  
41  
42  
43  
44  
45  
46  
47 drink industry on the policy particulars.  
48  
49  
50  
51  
52  
53

54 Reviewing their product portfolio was also discussed, where assessments of the product mix  
55  
56  
57 as a whole and by individual product were conducted when determining the response to the  
58  
59  
60

1  
2  
3  
4 SDIL. This aligns with previous findings that soft drink companies monitor their internal and  
5  
6  
7 external contexts to determine their products' market position in response to a stimulus such  
8  
9  
10 as the SDIL, and then respond with marketing or non-marketing activity to influence the  
11  
12  
13 purchasing of soft drinks [44]. A crucial external contextual component to response in our  
14  
15  
16 findings appears to be consumer response and preferences towards each product, as well as  
17  
18  
19 health as a whole.  
20  
21  
22  
23  
24  
25  
26

27 The UK soft drinks industry was reformulating products to lower sugar alternatives several  
28  
29  
30 years before the SDIL was introduced [44,45]. Perspectives expressed by participants align  
31  
32  
33 with this and suggest that there is a shift towards healthier drinks as the primary offer for  
34  
35  
36 consumers, with the SDIL accelerating the pace of this change. Consumer preferences for  
37  
38  
39 healthier products, and our finding that industry prioritises these health preferences in their  
40  
41  
42 decision making, are likely to have triggered the soft drinks industry to reformulate products  
43  
44  
45  
46 prior to the announcement of the SDIL. The advocacy (e.g. Jamie Oliver and Action on  
47  
48  
49 Sugar) in the early 2010s [46–48] and government threats to regulate industry [49] may have  
50  
51  
52 also increased consumer awareness about the health impact of sugar consumption and had a  
53  
54  
55  
56  
57 'signalling effect' to consumers to reduce their sugar consumption [50]. Participants in our  
58  
59  
60

1  
2  
3  
4 study suggested that the SDIL was adopted by the Government because of the existing  
5  
6  
7 popularity of sugar reduction among the public. It is likely that the UK public was aware that  
8  
9  
10 SSBs harm health much earlier than the policy announcement, resulting from media activity,  
11  
12  
13 such as that related to Jamie Oliver's campaigning [46] PHE's [47] and WHO's reports on  
14  
15  
16 sugar [48]. Therefore, the importance of public momentum towards health could be regarded  
17  
18  
19 as a trigger for industry action independently from encouraging government action via policy.  
20  
21  
22

23  
24  
25  
26  
27 Finally, participants expressed concern that policies introduced to combat obesity and other  
28  
29  
30 societal issues should be complementary not contradictory. The proposed ban on TV and  
31  
32  
33 online advertising of high fat, salt and sugar (HFSS) products by the UK Government [36]  
34  
35  
36 was viewed by industry to be misguided as they stated it may stop them being able to  
37  
38  
39 advertise their reformulated products; not just those impacted by the SDIL but products  
40  
41  
42 voluntarily reformulated which would still be classified as HFSS. Stakeholder requests for  
43  
44  
45 consistency across policy areas was also expressed by interviewees regarding this advertising  
46  
47  
48 ban [51]. This indicates that a more consistent approach to determining which products  
49  
50  
51 government wants industry to change would help ensure policies do not undermine one  
52  
53  
54  
55  
56  
57 another and build trust in government amongst industry.  
58  
59  
60

## *Conclusion*

This study explored food and drink industry perspectives on the SDIL. We found that industry accepted that legislation was useful in levelling the commercially competitive playing field. However, in practice participants stated that the SDIL had not created a 'true' level playing field as little consideration had been given to excluded product categories during policy design. Technical aspects of implementation were not adequately included and led to complexity for out of home retailers. Legislation on SSBs needs to take account of all industry sectors it affects, including out of home retail, as well as the manufacturing sector. Participants stated that only targeting sugary soft drinks was unfair due to the progress already made in the category compared to others (e.g., confectionary). The critical role of consumers in creating momentum towards sugar reduction in SSBs prior to the SDIL announcement, as well as dictating response to the SDIL was discussed. It is hypothesised that pro-health public views could be a useful lever in encouraging positive industry action independently of food and drink regulation. The impact of the SDIL was felt beyond the soft drinks industry, driving other product sectors to reformulate in anticipation of future regulation.



1  
2  
3  
4  
5  
6  
7 **Acknowledgements:** For the purpose of Open Access, the author has applied a Creative  
8  
9  
10 Commons Attribution (CC BY) licence to any Author Accepted Manuscript version arising.  
11  
12  
13  
14  
15  
16

17 **Competing Interests:** None  
18  
19  
20  
21  
22

23 **Contributorship Statement:** Dr. Catrin P Jones: Conceptualization, Methodology, Formal  
24  
25 analysis, Investigation, Data Curation, Writing - Original Draft, Project administration. Dr.  
26  
27 Hannah Forde: Formal analysis, Writing - Review & Editing. Dr Tarra L. Penney:  
28  
29 Conceptualization, Methodology, Investigation, Data Curation, Writing - Review & Editing,  
30  
31 Funding acquisition. Dr. Dolly R. Z. Theis: Formal analysis, Writing - Review & Editing  
32  
33 Prof. Steven Cummins: Conceptualization, Methodology, Formal analysis, Writing - Review  
34  
35 & Editing, Supervision, Funding acquisition. Prof. Jean Adams: Formal analysis, Writing -  
36  
37 Review & Editing, Funding acquisition. Dr. Cherry Law: Formal analysis, Writing - Review  
38  
39 & Editing. Prof. Harry Rutter: Formal analysis, Writing - Review & Editing, Funding  
40  
41 acquisition. Prof. Richard Smith: Formal analysis, Writing - Review & Editing, Funding  
42  
43  
44  
45  
46  
47  
48  
49  
50  
51  
52  
53  
54  
55  
56  
57  
58  
59  
60

1  
2  
3 acquisition. Prof. Martin White: Conceptualization, Methodology, Resources, Supervision,  
4  
5  
6  
7 Project administration, Funding acquisition, Formal analysis, Writing - Review & Editing.  
8  
9  
10

11  
12  
13 **Funding:** This project was funded by the NIHR Public Health Research programme (Grant  
14  
15  
16 Nos. 16/49/01 and 16/130/01). At the time this study was conducted CPJ, MW, ELR, HF,  
17  
18  
19 TLP, DT, JA, OA, SA, were also supported in part by: Programme grants to the MRC  
20  
21  
22  
23 Epidemiology Unit from the Medical Research Council (grant No. MC\_UU\_12015/6 and  
24  
25  
26 MC\_UU\_00006/7); and the Centre for Diet and Activity Research (CEDAR), a UKCRC  
27  
28  
29  
30 Public Health Research Centre of Excellence – funding from the British Heart Foundation,  
31  
32  
33 Cancer Research UK, the Economic and Social Research Council, the Medical Research  
34  
35  
36 Council, the National Institute for Health Research, and the Wellcome Trust, under the  
37  
38  
39  
40 auspices of the UK Clinical Research Collaboration is gratefully acknowledged. HF received  
41  
42  
43  
44 funding for her PhD studentship from the Economic and Social Research Council and Public  
45  
46  
47 Health England, and she has received further discretionary funding from the Economic and  
48  
49  
50 Social Research Council and Murray Edwards College, Cambridge. The views expressed are  
51  
52  
53  
54 those of the authors and not necessarily those of the any of the above-named funders. The  
55  
56  
57  
58  
59  
60

1  
2  
3 funders had no role in study design, data collection and analysis, decision to publish, or  
4  
5  
6  
7 preparation of the manuscript.  
8  
9

10  
11  
12  
13 **Data availability statement.** To maintain participant anonymity and confidentiality, data is not  
14  
15  
16  
17 available due to the identifiable nature of participants from transcripts and recordings.  
18  
19

20  
21  
22  
23 **Ethics approval statement:** The study was approved by the Humanities and Social Science  
24  
25  
26  
27 Ethics Committee at the University of Cambridge, UK. No approval ID was provided by this  
28  
29  
30  
31 committee.  
32  
33

## 34 35 36 37 **References**

- 38  
39  
40  
41 1 Afshin A, Sur PJ, Fay KA, *et al.* Health effects of dietary risks in 195 countries, 1990–  
42  
43 2017: a systematic analysis for the Global Burden of Disease Study 2017. *The Lancet*  
44  
45 2019;**393**:1958–72. doi:10.1016/S0140-6736(19)30041-8
- 46  
47 2 World Health Organization. Taxes on sugary drinks: Why do it? World Health  
48  
49 Organization 2017.
- 50  
51 3 Andreyeva T, Marple K, Marinello S, *et al.* Outcomes following taxation of sugar-  
52  
53 sweetened beverages: a systematic review and meta-analysis. *JAMA Netw Open*  
54  
55 2022;**5**:e2215276–e2215276.
- 56  
57 4 Teng AM, Jones AC, Mizdrak A, *et al.* Impact of sugar-sweetened beverage taxes on  
58  
59 purchases and dietary intake: systematic review and meta-analysis. *Obesity Reviews*  
60  
2019;**20**:1187–204.

- 1  
2  
3  
4 5 Cawley J, Frisvold D. Taxes on sugar-sweetened beverages: Political economy, and  
5 effects on prices, purchases, and consumption. *Food Policy* 2023;117:102441.  
6  
7 6 The World Bank. Global SSB Tax Database. <https://ssbtax.worldbank.org/> (accessed  
8 25 May 2023).  
9  
10 7 HM Revenue & Customs. Soft Drinks Industry Levy.  
11 2016.[https://www.gov.uk/government/publications/soft-drinks-industry-levy/soft-](https://www.gov.uk/government/publications/soft-drinks-industry-levy/soft-drinks-industry-levy#:~:text=from the levy.,Policy objective,to reduce the sugar)  
12 [drinks-industry-levy#:~:text=from the levy.,Policy objective,to reduce the sugar](https://www.gov.uk/government/publications/soft-drinks-industry-levy/soft-drinks-industry-levy#:~:text=from the levy.,Policy objective,to reduce the sugar)  
13 content (accessed 16 Jun 2020).  
14  
15 8 HM Revenue and Customs. Soft Drinks Industry Levy statistics background and  
16 references. 2022.[https://www.gov.uk/government/statistics/soft-drinks-industry-levy-](https://www.gov.uk/government/statistics/soft-drinks-industry-levy-statistics/soft-drinks-industry-levy-statistics-background-and-references)  
17 [statistics/soft-drinks-industry-levy-](https://www.gov.uk/government/statistics/soft-drinks-industry-levy-statistics/soft-drinks-industry-levy-statistics-background-and-references)  
18 [statistics-background-and-references](https://www.gov.uk/government/statistics/soft-drinks-industry-levy-statistics/soft-drinks-industry-levy-statistics-background-and-references) (accessed 10  
19 Nov 2022).  
20  
21 9 Cabinet Office, Department of Health and Social Care, HM Treasury, *et al.* Childhood  
22 obesity: a plan for action.  
23 2016.[https://www.gov.uk/government/publications/childhood-obesity-a-plan-for-](https://www.gov.uk/government/publications/childhood-obesity-a-plan-for-action)  
24 [action](https://www.gov.uk/government/publications/childhood-obesity-a-plan-for-action) (accessed 8 Apr 2021).  
25  
26 10 Department of Health and Social Care. Childhood obesity: a plan for action, chapter 2.  
27 2018.  
28  
29 11 HM Revenue & Customs. Guidance: Check if you need to register for the Soft Drinks  
30 Industry Levy. 2018.[https://www.gov.uk/guidance/check-if-you-need-to-register-for-](https://www.gov.uk/guidance/check-if-you-need-to-register-for-the-soft-drinks-industry-levy)  
31 [the-soft-drinks-industry-levy](https://www.gov.uk/guidance/check-if-you-need-to-register-for-the-soft-drinks-industry-levy) (accessed 21 May 2023).  
32  
33 12 Gauke D. Budget 2016. 2016. [https://www.gov.uk/government/publications/budget-](https://www.gov.uk/government/publications/budget-2016-documents)  
34 [2016-documents](https://www.gov.uk/government/publications/budget-2016-documents)  
35  
36 13 HM Treasury, Osborne. G. Budget 2016: George Osborne's speech.  
37 2016.<https://www.gov.uk/government/speeches/budget-2016-george-osbornes-speech>  
38 (accessed 6 Apr 2023).  
39  
40 14 Rogers NT, Cummins S, Forde H, *et al.* Associations between trajectories of obesity  
41 prevalence in English primary school children and the UK soft drink industry levy: an  
42 interrupted time series analysis of surveillance data. *medRxiv* Published Online First:  
43 2022. doi:<https://doi.org/10.1101/2022.09.16.22280030>  
44  
45 15 Hilton S, Buckton CH, Patterson C, *et al.* Following in the footsteps of tobacco and  
46 alcohol? Stakeholder discourse in UK newspaper coverage of the Soft Drinks Industry  
47 Levy. *Public Health Nutr* 2019;22:2317–28. doi:10.1017/S1368980019000739  
48  
49  
50  
51  
52  
53  
54  
55  
56  
57  
58  
59  
60

- 1  
2  
3  
4 16 Economics O. The Economic Impact of the Soft Drinks Levy, Final Report. *London: Oxford Economics* 2016.
- 5  
6  
7 17 Penney TL, Adams J, White M. Industry reactions to the UK Soft Drinks Industry  
8 Levy: Unpacking the evolving discourse from announcement to implementation. *J*  
9 *Epidemiol Community Health (1978)* 2018;**72**:A43. doi:10.1136/jech-2018-  
10 SSMabstracts.88  
11  
12  
13 18 Law C, Cornelsen L, Adams J, *et al*. An analysis of the stock market reaction to the  
14 announcements of the UK Soft Drinks Industry Levy. *Econ Hum Biol*  
15 2020;**38**:100834. doi:10.1016/j.ehb.2019.100834  
16  
17  
18 19 Law C, Cornelsen L, Adams J, *et al*. The impact of UK Soft Drinks Industry Levy on  
19 manufacturers' domestic turnover. *Econ Hum Biol* 2020;:100866.  
20  
21  
22 20 Penney T, Adams J, White M. LB4 Industry reactions to the UK soft drinks industry  
23 levy: unpacking the evolving discourse from announcement to implementation. *BMJ*  
24 2018. A43.1-A43. doi:10.1136/jech-2018-ssmabstracts.88  
25  
26  
27 21 Hilton S, Buckton CH, Katikireddi SV, *et al*. Who says what about sugar-sweetened  
28 beverage tax? Stakeholders' framing of evidence: a newspaper analysis. *The Lancet*  
29 2017;**390**:S44. doi:10.1016/s0140-6736(17)32979-3  
30  
31  
32 22 Buckton CH, Hilton S, Patterson C, *et al*. DID PROPONENTS AND OPPONENTS  
33 OF THE SOFT DRINKS INDUSTRY LEVY USE THE NEWS MEDIA TO  
34 INFLUENCE THE POLICY DEBATE? A QUALITATIVE DISCOURSE  
35 ANALYSIS USING PRACTICAL REASONING. *J Epidemiol Community Health*  
36 (1978) 2018;**72**:A1–2. doi:10.1136/jech-2018-SSMabstracts.2  
37  
38  
39 23 Buckton CH, Patterson C, Hyseni L, *et al*. The palatability of sugar-sweetened  
40 beverage taxation: A content analysis of newspaper coverage of the UK sugar debate.  
41 *PLoS One* 2018;**13**:1–15. doi:10.1371/journal.pone.0207576  
42  
43  
44 24 Forde H, Penney TL, White M, *et al*. Understanding Marketing Responses to a Tax on  
45 Sugary Drinks: A Qualitative Interview Study in the United Kingdom, 2019. *Int J*  
46 *Health Policy Manag* Published Online First: 23 February 2022.  
47 doi:10.34172/ijhpm.2022.5465  
48  
49  
50  
51  
52 25 Braun V, Clarke V. *Successful Qualitative Research: A Practical Guide for Beginners*.  
53 SAGE 2013.  
54  
55  
56 26 White M. Evaluation of the health impacts of the UK Treasury Soft Drinks Industry  
57 Levy (SDIL). 2017;:1–  
58 46.<https://www.journalslibrary.nihr.ac.uk/programmes/phr/1613001/#/>  
59  
60

- 1  
2  
3  
4 27 Harvey WS. Methodological Approaches for Interviewing Elites. *Geogr Compass*  
5 2010;**4**:193–205. doi:10.1111/j.1749-8198.2009.00313.x  
6  
7 28 Berry JM, Browne W. Validity and Reliability Issues In Elite Interviewing. *PS Polit*  
8 *Sci Polit* 2003;**35**:679–82.  
9  
10 29 Harvey WS. Strategies for conducting elite interviews. *Qualitative Research*  
11 2011;**11**:431–41. doi:10.1177/1468794111404329  
12  
13 30 Goldstein K. Getting in the Door: Sampling and Completing Elite Interviews. *Political*  
14 *Science & Politics* 2002;**35**:669–72. doi:10.1017/S1049096502001130  
15  
16 31 Stephens N. Collecting data from elites and ultra elites: Telephone and face-to-face  
17 interviews with macroeconomists. *Qualitative Research* 2007;**7**:203–16.  
18 doi:10.1177/1468794107076020  
19  
20 32 Braun V, Clarke V. Using thematic analysis in psychology. *Qual Res Psychol*  
21 2006;**3**:77–101.  
22  
23 33 Braun V, Clarke V. Can I use TA? Should I use TA? Should I not use TA? Comparing  
24 reflexive thematic analysis and other pattern-based qualitative analytic approaches.  
25 *Couns Psychother Res* 2020;**37**–47. doi:10.1002/capr.12360  
26  
27 34 Braun V, Clarke V. What can ‘thematic analysis’ offer health and wellbeing  
28 researchers? *Int J Qual Stud Health Well-being* 2014;**9**. doi:10.3402/qhw.v9.26152  
29  
30 35 Department of Health and Social Care. Calorie labelling in the out of home sector:  
31 implementation guidance. 2021.<https://www.gov.uk/government/publications/calorie-labelling-in-the-out-of-home-sector/calorie-labelling-in-the-out-of-home-sector-implementation-guidance#:~:text=The%20out%20of%20home%20sector%20is%20generally%20considered%20to%20be,on%20or%20off%20the%20premises> (accessed 14 Dec 2022).  
32  
33  
34  
35  
36  
37  
38  
39  
40  
41  
42  
43  
44 36 Department for Digital Culture Media & Sport, Department of Health & Social Care.  
45 Introducing a total online advertising restriction for products high in fat, sugar and salt  
46 (HFSS). 2021.<https://www.gov.uk/government/consultations/total-restriction-of-online-advertising-for-products-high-in-fat-sugar-and-salt-hfss/introducing-a-total-online-advertising-restriction-for-products-high-in-fat-sugar-and-salt-hfss> (accessed 6  
47  
48  
49  
50  
51  
52  
53  
54 37 Office for Health Improvement and Disparities. Sugar, salt and calorie reduction and  
55 reformulation. 2017.<https://www.gov.uk/government/collections/sugar-reduction>  
56 (accessed 11 Jan 2023).  
57  
58  
59  
60

- 1  
2  
3  
4 38 Stewart H. ‘Sin taxes’: Boris Johnson vows to review sugar levy. *The Guardian*.  
5 2019.[https://www.theguardian.com/politics/2019/jul/03/boris-johnson-vows-to-](https://www.theguardian.com/politics/2019/jul/03/boris-johnson-vows-to-review-whether-sugar-tax-improves-health)  
6 review-whether-sugar-tax-improves-health (accessed 19 Oct 2022).  
7  
8  
9 39 Forde H, Penney T, White M, *et al*. A Framework for Understanding Marketing  
10 Responses to a Tax on Sugary Drinks: a Qualitative Interview Study in the United  
11 Kingdom, 2019. *Int J Health Policy Manag* 2022.  
12  
13 40 Lacy-Nichols J, Marten R, Crosbie E, *et al*. The public health playbook: ideas for  
14 challenging the corporate playbook. *Lancet Glob Health* 2022.  
15  
16 41 Wiist WH. The corporate play book, health, and democracy: the snack food and  
17 beverage industry’s tactics in context. *Sick societies: Responding to the global*  
18 *challenge of chronic disease* 2011;:204–16.  
19  
20 42 Petticrew M, Katikireddi SV, Knai C, *et al*. ‘Nothing can be done until everything is  
21 done’: The use of complexity arguments by food, beverage, alcohol and gambling  
22 industries. *J Epidemiol Community Health (1978)* 2017;71:1078–83.  
23 doi:10.1136/jech-2017-209710  
24  
25 43 Theis D, White M. Is Obesity Policy in England Fit for Purpose? Analysis of  
26 Government Strategies and Policies, 1992–2020. *Milbank Quarterly* 2021;99:126–70.  
27 doi:10.1111/1468-0009.12498  
28  
29 44 Forde H, Penney T, White M, *et al*. Understanding Marketing Responses to a Tax on  
30 Sugary Drinks: a Qualitative Interview Study in the United Kingdom, 2019. *Int J*  
31 *Health Policy Manag* 2022.  
32  
33 45 Scarborough P, Adhikari V, Harrington RA, *et al*. Impact of the announcement and  
34 implementation of the UK Soft Drinks Industry Levy on sugar content, price, product  
35 size and number of available soft drinks in the UK, 2015-19: A controlled interrupted  
36 time series analysis. *PLoS Med* 2020;17:e1003025.  
37  
38 46 Boseley S. Jamie Oliver’s Sugar Rush: a crusade to save Britain’s health. *The*  
39 *Guardian*. 2015.  
40  
41 47 Tedstone A, Targett V, Allen R. Sugar Reduction: The evidence for action About  
42 Public Health England. *Public Health England* Published Online First:  
43 2015.[www.gov.uk/phe%5Cnwww.facebook.com/PublicHealthEngland](http://www.gov.uk/phe%5Cnwww.facebook.com/PublicHealthEngland)  
44  
45 48 World Health Organization. Sugars intake for adults and children. 2015.  
46 <https://www.who.int/publications/i/item/9789241549028> (accessed 14 Oct 2022).  
47  
48 49 Nieburg O. Kellogg shuns ‘silver bullet’ 30% UK cereals sugar cap.  
49 [bakeryandsnacks.com](http://bakeryandsnacks.com).  
50  
51  
52  
53  
54  
55  
56  
57  
58  
59  
60

1  
2  
3  
4 2013.[https://www.bakeryandsnacks.com/Article/2013/01/07/Kellogg-shuns-30-sugar-](https://www.bakeryandsnacks.com/Article/2013/01/07/Kellogg-shuns-30-sugar-cap-proposal-for-UK-cereals)  
5 cap-proposal-for-UK-cereals (accessed 6 Jan 2023).  
6

7 50 Rose D, Theis Z. What influences government policymaking? The case of childhood  
8 obesity in England. 2022.  
9

10 51 Forde H, Boyland EJ, Scarborough P, *et al*. Exploring the potential impact of the  
11 proposed UK TV and online food advertising regulations: a concept mapping study.  
12 *BMJ Open* 2022;**12**. doi:10.1136/bmjopen-2021-060302  
13  
14  
15  
16  
17  
18  
19  
20  
21  
22  
23  
24  
25  
26  
27  
28  
29  
30  
31  
32  
33  
34  
35  
36  
37  
38  
39  
40  
41  
42  
43  
44  
45  
46  
47  
48  
49  
50  
51  
52  
53  
54  
55  
56  
57  
58  
59  
60



### Supplementary File 1: Researcher Reflexivity

Braun and Clarke discuss reflexivity as a fundamental characteristic of thematic analysis, involving critical reflection of researcher perspectives, and how these will be integrated within the analysis and interpretation of data [22]. The complete elimination of bias is not something that can be achieved in qualitative research and more importantly should not be an aim. Unlike statistical analysis, the researcher is the tool of analysis. The researcher therefore is an integral part of the analytic process and to conduct qualitative thematic analysis well, they must develop an understanding of how their own perspectives, position and view of reality helps illuminate will influence the analysis [22].

This study aimed to centre participants' words in a descriptive manner to preserve their intention. This approach was also chosen due to reflection by the research team on our positionality as public health academics. We aimed to understand industry perspectives regarding the SDIL; however, it is important to acknowledge that the personal and professional goals of the research team (authors on this paper) as public health researchers are likely to be different from those of people working in the food and drink industry. Therefore, a descriptive approach was selected which prizes participants' words and perspectives over and above researcher interpretations. Whilst our perspectives have still influenced the analysis, as they should in good qualitative practice, we sought to minimise the influence of our biases and negativity towards some of the practices of the food and drink industry, to truly 'listen' to the perspectives of our participants. As a result, a modified version of Braun and Clarke's thematic analysis was used; reflexivity was a priority throughout the analysis in line with the approach however we sought to be less interpretive than their more recent guidance proposes [22].

1  
2  
3  
4  
5  
6 It is also important to note that, although we have taken a descriptive approach, the results  
7  
8 represent participant perspectives. Whilst the researchers work to put aside their biases which  
9  
10 may lean towards those more critical of the food and drink industry; statements, findings and  
11  
12 themes found do not represent an objective truth, rather the reported perspectives of  
13  
14 participants. We urge readers of this work to use their own critical reflection when  
15  
16 interpreting and using these findings.  
17  
18  
19  
20  
21  
22  
23  
24  
25  
26  
27  
28  
29  
30  
31  
32  
33  
34  
35  
36  
37  
38  
39  
40  
41  
42  
43  
44  
45  
46  
47  
48  
49  
50  
51  
52  
53  
54  
55  
56  
57  
58  
59  
60

## COREQ (CONsolidated criteria for REporting Qualitative research) Checklist

A checklist of items that should be included in reports of qualitative research. You must report the page number in your manuscript where you consider each of the items listed in this checklist. If you have not included this information, either revise your manuscript accordingly before submitting or note N/A.

| Topic                                          | Item No. | Guide Questions/Description                                                                                                                              | Reported on Page No. |
|------------------------------------------------|----------|----------------------------------------------------------------------------------------------------------------------------------------------------------|----------------------|
| <b>Domain 1: Research team and reflexivity</b> |          |                                                                                                                                                          |                      |
| <i>Personal characteristics</i>                |          |                                                                                                                                                          |                      |
| Interviewer/facilitator                        | 1        | Which author/s conducted the interview or focus group?                                                                                                   |                      |
| Credentials                                    | 2        | What were the researcher's credentials? E.g. PhD, MD                                                                                                     |                      |
| Occupation                                     | 3        | What was their occupation at the time of the study?                                                                                                      |                      |
| Gender                                         | 4        | Was the researcher male or female?                                                                                                                       |                      |
| Experience and training                        | 5        | What experience or training did the researcher have?                                                                                                     |                      |
| <i>Relationship with participants</i>          |          |                                                                                                                                                          |                      |
| Relationship established                       | 6        | Was a relationship established prior to study commencement?                                                                                              |                      |
| Participant knowledge of the interviewer       | 7        | What did the participants know about the researcher? e.g. personal goals, reasons for doing the research                                                 |                      |
| Interviewer characteristics                    | 8        | What characteristics were reported about the interviewer/facilitator? e.g. Bias, assumptions, reasons and interests in the research topic                |                      |
| <b>Domain 2: Study design</b>                  |          |                                                                                                                                                          |                      |
| <i>Theoretical framework</i>                   |          |                                                                                                                                                          |                      |
| Methodological orientation and Theory          | 9        | What methodological orientation was stated to underpin the study? e.g. grounded theory, discourse analysis, ethnography, phenomenology, content analysis |                      |
| <i>Participant selection</i>                   |          |                                                                                                                                                          |                      |
| Sampling                                       | 10       | How were participants selected? e.g. purposive, convenience, consecutive, snowball                                                                       |                      |
| Method of approach                             | 11       | How were participants approached? e.g. face-to-face, telephone, mail, email                                                                              |                      |
| Sample size                                    | 12       | How many participants were in the study?                                                                                                                 |                      |
| Non-participation                              | 13       | How many people refused to participate or dropped out? Reasons?                                                                                          |                      |
| <i>Setting</i>                                 |          |                                                                                                                                                          |                      |
| Setting of data collection                     | 14       | Where was the data collected? e.g. home, clinic, workplace                                                                                               |                      |
| Presence of non-participants                   | 15       | Was anyone else present besides the participants and researchers?                                                                                        |                      |
| Description of sample                          | 16       | What are the important characteristics of the sample? e.g. demographic data, date                                                                        |                      |
| <i>Data collection</i>                         |          |                                                                                                                                                          |                      |
| Interview guide                                | 17       | Were questions, prompts, guides provided by the authors? Was it pilot tested?                                                                            |                      |
| Repeat interviews                              | 18       | Were repeat interviews carried out? If yes, how many?                                                                                                    |                      |
| Audio/visual recording                         | 19       | Did the research use audio or visual recording to collect the data?                                                                                      |                      |
| Field notes                                    | 20       | Were field notes made during and/or after the interview or focus group?                                                                                  |                      |
| Duration                                       | 21       | What was the duration of the interviews or focus group?                                                                                                  |                      |
| Data saturation                                | 22       | Was data saturation discussed?                                                                                                                           |                      |
| Transcripts returned                           | 23       | Were transcripts returned to participants for comment and/or                                                                                             |                      |

| Topic                                  | Item No. | Guide Questions/Description                                                                                                        | Reported on Page No. |
|----------------------------------------|----------|------------------------------------------------------------------------------------------------------------------------------------|----------------------|
|                                        |          | correction?                                                                                                                        |                      |
| <b>Domain 3: analysis and findings</b> |          |                                                                                                                                    |                      |
| <i>Data analysis</i>                   |          |                                                                                                                                    |                      |
| Number of data coders                  | 24       | How many data coders coded the data?                                                                                               |                      |
| Description of the coding tree         | 25       | Did authors provide a description of the coding tree?                                                                              |                      |
| Derivation of themes                   | 26       | Were themes identified in advance or derived from the data?                                                                        |                      |
| Software                               | 27       | What software, if applicable, was used to manage the data?                                                                         |                      |
| Participant checking                   | 28       | Did participants provide feedback on the findings?                                                                                 |                      |
| <i>Reporting</i>                       |          |                                                                                                                                    |                      |
| Quotations presented                   | 29       | Were participant quotations presented to illustrate the themes/findings?<br>Was each quotation identified? e.g. participant number |                      |
| Data and findings consistent           | 30       | Was there consistency between the data presented and the findings?                                                                 |                      |
| Clarity of major themes                | 31       | Were major themes clearly presented in the findings?                                                                               |                      |
| Clarity of minor themes                | 32       | Is there a description of diverse cases or discussion of minor themes?                                                             |                      |

Developed from: Tong A, Sainsbury P, Craig J. Consolidated criteria for reporting qualitative research (COREQ): a 32-item checklist for interviews and focus groups. *International Journal for Quality in Health Care*. 2007. Volume 19, Number 6: pp. 349 – 357

**Once you have completed this checklist, please save a copy and upload it as part of your submission. DO NOT include this checklist as part of the main manuscript document. It must be uploaded as a separate file.**

# BMJ Open

## Industry views of the UK Soft Drinks Industry Levy: a thematic analysis of elite interviews with food and drink industry professionals, 2018-20

|                                 |                                                                                                                                                                                                                                                                                                                                                                                                                                                                                                                                                                                                                                                                                                                                                                                                                                                                                                                                                                                                             |
|---------------------------------|-------------------------------------------------------------------------------------------------------------------------------------------------------------------------------------------------------------------------------------------------------------------------------------------------------------------------------------------------------------------------------------------------------------------------------------------------------------------------------------------------------------------------------------------------------------------------------------------------------------------------------------------------------------------------------------------------------------------------------------------------------------------------------------------------------------------------------------------------------------------------------------------------------------------------------------------------------------------------------------------------------------|
| Journal:                        | <i>BMJ Open</i>                                                                                                                                                                                                                                                                                                                                                                                                                                                                                                                                                                                                                                                                                                                                                                                                                                                                                                                                                                                             |
| Manuscript ID                   | bmjopen-2023-072223.R3                                                                                                                                                                                                                                                                                                                                                                                                                                                                                                                                                                                                                                                                                                                                                                                                                                                                                                                                                                                      |
| Article Type:                   | Original research                                                                                                                                                                                                                                                                                                                                                                                                                                                                                                                                                                                                                                                                                                                                                                                                                                                                                                                                                                                           |
| Date Submitted by the Author:   | 14-Jul-2023                                                                                                                                                                                                                                                                                                                                                                                                                                                                                                                                                                                                                                                                                                                                                                                                                                                                                                                                                                                                 |
| Complete List of Authors:       | Jones, Catrin; University of Cambridge, MRC Epidemiology Unit<br>Forde, Hannah; University of Cambridge, MRC Epidemiology Unit;<br>University of Oxford, Nuffield Department of Primary Care Health Sciences<br>Penney, Tarra; York University, Global Food System and Policy Research, School of Global Health, Faculty of Health<br>Theis, Dolly; University of Cambridge, MRC Epidemiology Unit<br>Cummins, Steven; London School of Hygiene & Tropical Medicine, Population Health Innovation Lab, Department of Public Health, Environments & Society, Faculty of Public Health and Policy<br>Adams, J; University of Cambridge, MRC Epidemiology Unit<br>Law, Cherry; University of Reading, Department of Agri-Food Economics and Marketing<br>Rutter, Harry; University of Bath Department of Social and Policy Sciences, Social and Policy Sciences<br>Smith, Richard ; University of Exeter, Faculty of Health and Life Sciences<br>White, Martin; University of Cambridge, MRC Epidemiology Unit |
| <b>Primary Subject Heading</b>: | Health policy                                                                                                                                                                                                                                                                                                                                                                                                                                                                                                                                                                                                                                                                                                                                                                                                                                                                                                                                                                                               |
| Secondary Subject Heading:      | Qualitative research                                                                                                                                                                                                                                                                                                                                                                                                                                                                                                                                                                                                                                                                                                                                                                                                                                                                                                                                                                                        |
| Keywords:                       | Health policy < HEALTH SERVICES ADMINISTRATION & MANAGEMENT, Public health < INFECTIOUS DISEASES, QUALITATIVE RESEARCH                                                                                                                                                                                                                                                                                                                                                                                                                                                                                                                                                                                                                                                                                                                                                                                                                                                                                      |
|                                 |                                                                                                                                                                                                                                                                                                                                                                                                                                                                                                                                                                                                                                                                                                                                                                                                                                                                                                                                                                                                             |

SCHOLARONE™  
Manuscripts



I, the Submitting Author has the right to grant and does grant on behalf of all authors of the Work (as defined in the below author licence), an exclusive licence and/or a non-exclusive licence for contributions from authors who are: i) UK Crown employees; ii) where BMJ has agreed a CC-BY licence shall apply, and/or iii) in accordance with the terms applicable for US Federal Government officers or employees acting as part of their official duties; on a worldwide, perpetual, irrevocable, royalty-free basis to BMJ Publishing Group Ltd ("BMJ") its licensees and where the relevant Journal is co-owned by BMJ to the co-owners of the Journal, to publish the Work in this journal and any other BMJ products and to exploit all rights, as set out in our [licence](#).

The Submitting Author accepts and understands that any supply made under these terms is made by BMJ to the Submitting Author unless you are acting as an employee on behalf of your employer or a postgraduate student of an affiliated institution which is paying any applicable article publishing charge ("APC") for Open Access articles. Where the Submitting Author wishes to make the Work available on an Open Access basis (and intends to pay the relevant APC), the terms of reuse of such Open Access shall be governed by a Creative Commons licence – details of these licences and which [Creative Commons](#) licence will apply to this Work are set out in our licence referred to above.

Other than as permitted in any relevant BMJ Author's Self Archiving Policies, I confirm this Work has not been accepted for publication elsewhere, is not being considered for publication elsewhere and does not duplicate material already published. I confirm all authors consent to publication of this Work and authorise the granting of this licence.

1  
2  
3 **Industry views of the UK Soft Drinks Industry Levy: a thematic analysis of elite interviews**  
4  
5  
6  
7 **with food and drink industry professionals, 2018-20**  
8  
9  
10  
11  
12

13 Dr Catrin P Jones<sup>a\*</sup>, Dr Hannah Forde<sup>a,<</sup>, Dr Tarra L Penney<sup>b</sup>, Dr Dolly Theis<sup>a</sup>, Prof Steven  
14  
15  
16  
17 Cummins<sup>c</sup>, Prof Jean Adams<sup>a</sup>, Dr Cherry Law<sup>d</sup>, Prof Harry Rutter<sup>e</sup>, Prof Rich Smith<sup>f</sup>, Prof  
18  
19  
20 Martin White<sup>a</sup>.  
21  
22  
23  
24  
25  
26

27 a MRC Epidemiology Unit, School of Clinical Medicine, University of Cambridge, United  
28  
29  
30 Kingdom  
31  
32

33 b Global Food System and Policy Research, School of Global Health, Faculty of Health,  
34  
35  
36  
37 York University, Canada  
38  
39

40 c Population Health Innovation Lab, Department of Public Health, Environments & Society,  
41  
42  
43 Faculty of Public Health and Policy, London School of Hygiene & Tropical Medicine, United  
44  
45  
46  
47 Kingdom  
48  
49

50 d Department of Agri-Food Economics and Marketing, University of Reading, Reading, UK  
51  
52

53 e Department of Social and Policy Sciences, University of Bath, Bath, UK  
54  
55

56 f Faculty of Health and Life Sciences, University of Exeter, Exeter, UK  
57  
58  
59  
60

1  
2  
3 <Present address: Nuffield Department of Primary Care Health Sciences, University of Oxford, Oxford,  
4  
5  
6 United Kingdom  
7  
8  
9

10  
11  
12  
13 **\*Correspondence to:**  
14

15  
16 Dr Catrin Pedder Jones  
17

18  
19 MRC Epidemiology Unit, University of Cambridge School of Clinical Medicine, Box 285  
20

21  
22 Institute of Metabolic Science, Cambridge Biomedical Campus, Cambridge, CB2 0QQ,  
23

24  
25  
26 United Kingdom  
27

28  
29 [catrin.jones@mrc-epid.cam.ac.uk](mailto:catrin.jones@mrc-epid.cam.ac.uk)  
30

31  
32  
33 +44 (0)1223 769 114  
34  
35  
36  
37  
38

39 **Keywords:** Soft drinks, Soft drinks industry levy, Food and drink industry, sugar sweetened  
40  
41  
42 beverage  
43  
44  
45  
46  
47  
48  
49

50 **Word count:** 6605  
51  
52  
53  
54  
55

56 **Abstract**  
57  
58  
59  
60



1  
2  
3  
4 **Objectives:** The UK Soft Drinks Industry Levy (SDIL), implemented in 2018, has been  
5  
6  
7 successful in reducing the sugar content, and purchasing, of soft drinks, with limited financial  
8  
9  
10 impact on industry. Understanding the views of food and drink industry professionals  
11  
12  
13 involved in reacting to the SDIL is important for policymaking. However, their perceptions  
14  
15  
16 of the challenges of implementation and strategic responses are unknown. The aim of this  
17  
18  
19 study therefore was to explore how senior food and drink industry professionals viewed the  
20  
21  
22  
23  
24 SDIL.

25  
26  
27 **Design:** We undertook a qualitative descriptive study using elite interviews. Data were  
28  
29  
30 analysed using Braun and Clarke's approach to thematic analysis, taking an inductive  
31  
32  
33 exploratory and descriptive approach not informed by prior theory or frameworks.  
34  
35

36  
37 **Setting and participants:** Interviews were conducted via telephone with 14 senior  
38  
39  
40 professionals working in the food and drink industry.  
41

42  
43  
44 **Results:** Five main themes were identified: (1) *A level playing field...for some*; Industry  
45  
46  
47 accepted the SDIL as an attempt to create a level playing field but due to the exclusion of  
48  
49  
50 milk-based drinks, this was viewed as inadequate. (2) *Complex to implement, but no lasting*  
51  
52  
53 *negatives*; The SDIL was complex, expensive and time consuming to implement, with  
54  
55  
56 industry responses dependent on leadership buy-in. "(3) *Why us? – the SDIL unfairly targets*  
57  
58  
59  
60

1  
2  
3  
4 *the drinks industry*"; soft drinks are an unfair target when other categories also contain high  
5  
6  
7 sugar. "(4) *The consumer is king*"; Consumers were a key focus of the industry response to  
8  
9  
10 this policy. "(5) *The future of the SDIL*"; There appeared to be a wider ripple effect, which  
11  
12  
13 primed industry to prepare for future regulation in support of health and environmental  
14  
15  
16  
17 sustainability.

18  
19  
20 **Conclusions:** Insights from senior food and drink industry professionals illustrate how sugar  
21  
22  
23 sweetened beverage taxes might be successfully implemented and improve understanding of  
24  
25  
26  
27 industry responses to taxes and other food and drink policies.  
28  
29  
30  
31  
32

### 33 **Strengths and limitations of this study**

- 34  
35  
36  
37 • This qualitative study explored how senior food and drink industry professionals  
38  
39  
40 viewed the Soft Drinks Industry Levy.
- 41  
42  
43  
44 • We undertook elite interviews with 14 professionals working in the food and drink  
45  
46  
47 industry, who have often been difficult to recruit in other studies.
- 48  
49  
50  
51 • Braun and Clarke's thematic analysis, taking a descriptive approach, was used to  
52  
53  
54 analyse the data.  
55  
56  
57  
58  
59  
60

- 1  
2  
3  
4 • Elite interviewing methods allow for the building of relationships to elicit meaningful  
5  
6  
7 responses from participants.  
8  
9  
10 • A limitation of this work is that interviews were carried out over a long period of time  
11  
12  
13 due to challenges in recruitment.  
14  
15  
16  
17  
18  
19  
20  
21  
22  
23  
24  
25  
26  
27  
28  
29  
30  
31  
32  
33  
34  
35  
36  
37  
38  
39  
40  
41  
42  
43  
44  
45  
46  
47  
48  
49  
50  
51  
52  
53  
54  
55  
56  
57  
58  
59  
60

## Introduction

Diet-related non-communicable diseases are a major and growing problem, responsible for over 11 million deaths globally each year [1]. Sugar consumption is of particular concern, with the World Health Organization (WHO) recommending member states introduce sugar-sweetened beverage (SSB) taxes [2]. Reviews suggest that they reduce sales of, increase prices of and encourage reformulation of SSBs [3–5] and over 100 SSB taxes have been implemented worldwide covering 52% of the world's population [6]. SSB taxes have a variety of designs with 87% excise taxes [6]. The WHO recommend that a tiered SSB tax be introduced in countries with high administrative capacity, similar to that which has been introduced in the UK [2]. The Soft Drinks Industry Levy (SDIL) was announced on 16<sup>th</sup> March 2016 and implemented in the United Kingdom (UK) on 6<sup>th</sup> April 2018. According to the budget speech by George Osborne, Chancellor of the Exchequer at the time, it was designed to incentivise manufacturers of SSBs to reformulate their products [7] via charging a levy on soft drinks produced by companies when they leave the warehouse or when imported into the country [8]. Integrated in August 2016 as part of the UK Government's Childhood Obesity: A Plan For Action [9], the SDIL consists of two tiers (for particulars of the tax, see Box 1). A public consultation on the proposals between August - October 2016

1  
2  
3 set out the plans for the tiers and exclusions as described in Box 1. Few changes were made  
4  
5  
6  
7 as a result of this consultation and the SDIL was given royal assent on 27th April 2017. The  
8  
9  
10 Government published a second chapter of its childhood obesity plan in 2018, which  
11  
12  
13 suggested the SDIL may be extended to milk-based drinks, though this has not yet occurred  
14  
15  
16  
17 [10].  
18  
19  
20  
21  
22  
23  
24  
25  
26  
27  
28  
29  
30  
31  
32  
33

34 **Box 1. Soft Drinks Industry Levy Particulars [7]**

35  
36  
37 Eligible drinks:

- 38 •  $\geq 8$  g total sugar per 100 mL charged at 24 pence per litre
- 39
- 40 •  $\geq 5$  g and  $< 8$  g total sugar per 100 mL charged at 18 pence per litre
- 41  
42  
43  
44  
45

46  
47 Exemptions:

- 48 • Drinks containing more than 75% milk or 1.2% alcohol
- 49
- 50 • Alcohol substitute drinks
- 51  
52  
53  
54  
55
- 56 • Powdered drinks
- 57  
58  
59  
60

- 100% fruit juices
- Manufacturers selling under one million litres of drinks per year[11]

The SDIL was one of the first SSB fiscal interventions explicitly designed to incentivise reformulation [7,12,13]. This aim was largely achieved, substantially reducing overall SSB sugar content, and inducing a major shift of drinks from the higher levy tier to the lower tier and untaxed bracket between 2016 and 2018 (Scarborough et al., 2020). Reformulation is reflected in purchases of sugar from SSBs, with [14]. Prior to implementation of the SDIL, the food and drinks industry (hereafter referred to as ‘industry’) viewed the SDIL as having a potentially negative impact on profits resulting in job losses [15–17]. A negative stock market reaction to the SDIL announcement was observed, but this only lasted two days [18]. Similarly, a negative impact on company domestic turnover was observed following the announcement of the SDIL, but this resolved by the time of its implementation [19].

Critical to the success of the SDIL is the implementation of and reaction to the regulations by the drink industry. Therefore, it is important to understand perspectives of the industry as well as those who work in it regarding the implementation of such taxes. Previous work has

1  
2  
3 investigated industry perspectives of the SDIL expressed through the news media [15,20–23]  
4  
5  
6  
7 and the views of industry, civil society and academic participants on how marketing changed  
8  
9  
10 in response to the SDIL [24]. A notable gap in the literature, however, is perspectives of the  
11  
12  
13 SDIL from the commercial sector, not communicated publicly through news media nor  
14  
15  
16 focused solely on marketing responses. Important learning can be obtained by exploring the  
17  
18  
19 perspectives of commercial actors involved in responding to regulation. Interviews with  
20  
21  
22  
23 senior members of industry can help examine the impact of the SDIL on both the soft drinks  
24  
25  
26 industry and wider food and drink industry, an avenue not previously explored. This study  
27  
28  
29 therefore aimed to address these knowledge gaps and inform policymaking by exploring the  
30  
31  
32 perspectives of senior industry professionals regarding the UK SDIL.  
33  
34  
35  
36  
37  
38  
39

## 40 **Methods**

### 41 *Study design*

42  
43  
44 This study adopted a qualitative descriptive design involving elite interviews with senior  
45  
46  
47 industry professionals.  
48  
49  
50  
51  
52  
53  
54  
55  
56

### 57 *Methodological orientation*

1  
2  
3  
4 This research took an experiential qualitative approach, within a critical realist position.  
5  
6

7 Participant perspectives and perceptions were prized over researcher interpretations, and  
8  
9

10 reality was derived from our participants' words and meaning, rather than a reality  
11  
12

13 constructed through researchers' interpretation of their words [25]. A descriptive approach  
14  
15

16 was used to explore how the SDIL was viewed from the position of our participants.  
17  
18  
19  
20  
21  
22

### 23 ***Research team***

24  
25  
26 Prof Martin White (MW), Prof Steven Cummins (SC), Prof Jean Adams (JA), Prof Rich  
27  
28

29 Smith (RS) and Prof Harry Rutter (HR) secured funding for the overall evaluation of the  
30  
31

32 SDIL within which this study formed a part [26]. Interviews were conducted by Postdoctoral  
33  
34

35 Research Associates Dr. Tarra L Penney (TLP) and Dr. Catrin P Jones (CPJ). TLP led the  
36  
37

38 design of data collection and CPJ led the design of the analysis. MW & SC provided  
39  
40

41 guidance on the design of both elements. TLP and CPJ recruited and interviewed participants.  
42  
43

44  
45  
46 CPJ led the analysis with support from Dr Hannah Forde (HF). HF conducted secondary  
47  
48

49 coding to support theme generation and interpretation. All authors previously mentioned, as  
50  
51

52 well as Dr Dolly Theis (DT) and Dr Cherry Law (CL) were involved in data analysis and  
53  
54

55 interpretation, as well as drafting this manuscript.  
56  
57  
58  
59  
60



## *Participants*

Senior professionals from the soft drinks, food and other drinks industries were recruited to this study using purposive and snowball sampling. We adopted 'elite interviewing' methods to maximise involvement of senior professionals in positions of influence within their organisation and with high levels of responsibility [27]. This technique provides a series of strategies to support recruitment of difficult to access key participants, and to ensure the validity and reliability of data [28]. The principles of elite interviewing were used to inform recruitment including stronger emphasis on the maintenance of trust, importance of interview tone of the interview, preparing appropriately, and engaging in and tailoring dialogue relevant to each informant, more so than in traditional interviews [29,30].

Individuals were considered eligible to participate based on the following criteria: a) currently or previously held a high-level industry position (at the managerial, director or chief officer level), b) their organisation and their professional role was directly or indirectly impacted by the SDIL and c) they could provide a novel perspective, determined by their job role or the company they work for not previously heard in our interviews, to ensure a range

1  
2  
3  
4 of views. Recruitment typically involved an email introduction by a member of the team or  
5  
6  
7 informant contact, although CPJ also attended industry food events and recruited face to face.  
8  
9

10 Initial contact was followed by an informal telephone conversation with TLP or CPJ to  
11  
12  
13 discuss the research purpose, team and informant interests and perspectives, ultimately  
14  
15  
16 proceeding to full participation via telephone interview. Recruitment ceased when networks  
17  
18  
19 were exhausted, and no further contacts identified.  
20  
21  
22  
23  
24  
25  
26

### 27 *Data collection*

28  
29  
30 Telephone interviews were conducted from June 2018 to June 2020. Participant information  
31  
32  
33 sheets were sent to potential participants prior to participating in the informal discussion.  
34  
35  
36  
37 Informed consent was obtained verbally prior to commencement of the formal telephone  
38  
39  
40 interview, which was digitally audio-recorded. Interviews were undertaken using a minimally  
41  
42  
43 structured topic guide containing three broad areas of inquiry: a) Can you tell me about your  
44  
45  
46 role and organization? b) Can you tell me about your sector as a whole? c) What do you  
47  
48  
49 know about the UK Soft Drinks Industry Levy and its impacts? Elite interviewing  
50  
51  
52 necessitates informed and adaptive dialogue [29,31], meaning participants could engage in  
53  
54  
55 ways most relevant to their specific expertise or experiences within these broad areas.  
56  
57  
58  
59  
60

1  
2  
3  
4 Interviews were transcribed verbatim by a trusted external company, and transcripts were  
5  
6  
7 checked against the audio files by CPJ to identify any inaccuracies. Transcripts were  
8  
9  
10 anonymised prior to analysis by removing names of people, organisations, and brands.  
11  
12  
13  
14  
15  
16

### 17 *Analysis*

18  
19  
20 Analysis commenced once all interviews had been conducted and transcribed. Braun and  
21  
22  
23 Clarke's thematic analysis was used, taking an inductive exploratory and descriptive  
24  
25  
26 approach not informed by any prior theory or framework [32]. This approach is flexible due  
27  
28  
29 to lack of alignment with specific epistemological and ontological stance [33,34]. Six  
30  
31  
32 analytic steps were conducted: 1) familiarisation, 2) data coding, 3) initial theme generation,  
33  
34  
35  
36  
37 4) theme development and review, 5) theme refining, defining and naming, 6) writing up.  
38  
39  
40  
41  
42  
43

44 CPJ listened to audio files and read transcripts at least twice to become familiar with them,  
45  
46  
47 whilst making notes on initial impressions and patterns (step 1). Following familiarisation,  
48  
49  
50 CPJ worked systematically through the entire data set and conducted complete coding of all  
51  
52  
53 data, in which segments of data were given a label to describe their area of interest. Coding  
54  
55  
56  
57 was supported by NVivo software version 12. Semantic codes were derived directly from  
58  
59  
60

1  
2  
3  
4 participants' speech or codes where phrases of speech were brief enough to be directly coded  
5  
6  
7 (step 2). CPJ then sorted these initial codes into concise categories (overarching codes),  
8  
9  
10 which clearly described the content of the data (step 3). A reflective diary was kept  
11  
12  
13 throughout the coding process by CPJ to note reflections on findings and to ensure a data-  
14  
15  
16 driven analytic process. Please see supplementary file 1 for a detailed account of reflexivity.  
17  
18  
19  
20  
21  
22  
23 HF also familiarised themselves with the transcripts (step 1) and then examined CPJ's coding to  
24  
25  
26 ensure the codes were data driven with as little interpretation as possible (step 2). CPJ then  
27  
28  
29 collated codes that shared a common pattern into themes (step 3). Again, CPJ and HF met to  
30  
31  
32 discuss and refine the themes to ensure they were descriptive with minimal interpretation  
33  
34  
35  
36  
37 (step 4).  
38  
39  
40  
41  
42  
43

44 A document containing themes, codes within them, and extensive anonymised quotes was  
45  
46  
47 shared with all co-authors in two phases: phase 1 March 2022 and phase 2 October 2022  
48  
49  
50 (step 5). This data clinic aimed to minimise researcher interpretation. A document presented  
51  
52  
53 theme descriptions and asked co-authors to answer the following questions for each theme: 1)  
54  
55  
56 Is the theme descriptive? 2) Does the theme represent the data accurately? 3) What do you  
57  
58  
59  
60

1  
2  
3 think the theme tells us about the SDIL from the perspective of industry? JA, DT, CL  
4  
5  
6 completed the data clinic document in phase 1. Themes were amended based on their  
7  
8  
9  
10 reflections and the document updated in October 2022. SC, MW, HR & RS completed the  
11  
12  
13 data clinic form in phase 2. Final themes and the manuscript were written up by CPJ and  
14  
15  
16  
17 reviewed by all co-authors (step 6).  
18  
19  
20  
21  
22

### 23 ***Patient and public involvement***

24  
25  
26 This study is part of the 'Evaluation of the health impacts of the UK Treasury Soft Drinks  
27  
28  
29 Industry Levy (SDIL)' funded by NIHR ([award no. 16/130/01](#)). Project oversight is provided  
30  
31  
32  
33 by an independent study steering committee (ISSC) which contains members of the public.  
34  
35  
36  
37 The ISSC for the overall project met biannually from 2017 – 2023 and were asked to provide  
38  
39  
40  
41 advice on methodology as well as interpretation of our findings.  
42  
43  
44  
45  
46

### 47 **Results**

48  
49  
50 Fourteen participants were recruited (Table 1). Participants' roles within organisations were  
51  
52  
53  
54 diverse; chief officers, directors, and managers with overall responsibility or with specialist  
55  
56  
57 responsibilities for finance, strategy, operations, marketing, public relations or nutrition.  
58  
59  
60

1  
2  
3 Interviews ranged in length from 26 to 62 minutes. Six additional participants were  
4  
5  
6  
7 approached and took part in informal discussions; three did not participate due to scheduling  
8  
9  
10 issues, and three refused to take part. Five inductively derived, interlinked themes and 15  
11  
12  
13 subthemes were identified (Box 2).  
14  
15  
16  
17  
18  
19  
20  
21  
22  
23  
24  
25  
26

27 **Table 1.** Participant details  
28  
29

| Sector Category                           | N |
|-------------------------------------------|---|
| Drink manufacturers                       | 4 |
| Food and drink manufacturers              | 3 |
| Supermarkets                              | 3 |
| Industry associations                     | 1 |
| Out-of-home* food and drink manufacturers | 1 |
| Out-of-home retailers                     | 1 |
| Advertising consultants                   | 1 |

30  
31  
32  
33  
34  
35  
36  
37  
38  
39  
40  
41  
42  
43  
44  
45  
46  
47  
48  
49  
50  
51  
52  
53  
54  
55  
56  
57  
58  
59  
60

*\*\* “The out-of-home sector is generally considered to be any outlet where food or drink is prepared in a way that means it is ready for immediate consumption, on or off the premises”[35]*

**Box 2. Theme and sub-theme summary**

Theme 1: A level playing field...for some

*The SDIL created a level playing field*

*Milk-based drinks increased the complexity in the out-of-home sector*

*Challenges for supermarkets with large product portfolios*

Theme 2: Complex to implement but no lasting negative effects

*Complexities in strategic response – price and product are key*

*Global companies and internal systems*

*Contradictory government messaging*

*Leadership buy-in dictates strategic response*

*Few long-lasting negative effects & SDIL provided opportunities*

Theme 3: Why us? – The SDIL unfairly targets the drinks industry

*Sugary drinks in isolation were unfair targets for regulation*

*Distrust of government's motivations to introduce the SDIL*

Theme 4: Consumer is king

*Consumer response to product changes resulting from the SDIL*

*Consumer momentum towards healthier products*

Theme 5: The future of the SDIL

*Extending to milk and fruit-based drinks*

*Impact on the wider food and drink industry and on other sectors*

*Proposal to reverse the SDIL*

***Theme 1: A level playing field...for some***

***The SDIL created a level playing field***

1  
2  
3  
4 Industry professionals accepted that the SDIL helped create a level playing field, where no  
5  
6  
7 organisation lost out by taking action on health that their competitors did not “... *legislation*  
8  
9  
10 *level playing fields is so important and that’s why with these big public health*  
11  
12  
13 *initiatives...I’m actually really quite pro government intervention” – Supermarket. Soft*  
14  
15  
16 drinks manufacturers also discussed that the two years to prepare for the implementation of  
17  
18 the SDIL was sufficient and they were happy they could develop an adequate response within  
19  
20 that time. “*I’m not aware of any significant implementation or challenges that our members*  
21  
22  
23 *have encountered, I mean they did have time to adapt, the legislation was published in good*  
24  
25  
26 *time to allow them to understand exactly what they would be required to do” – Trade*  
27  
28  
29  
30  
31 *association*  
32  
33  
34  
35  
36  
37  
38  
39  
40

41 However, participants also stated that a lack of understanding and consultation from  
42  
43 government meant a ‘true’ level playing field for all sectors involved in the sales of sugary  
44  
45 drinks had not been not achieved “...*you want to really do it smartly so everybody feels*  
46  
47  
48 *they’re 100% equally affected and you don’t get this... ‘my product is in scope, your product*  
49  
50  
51 *is out of scope’...it doesn’t create the sense of unilateral ‘let’s do this’... which is what it*  
52  
53  
54  
55  
56  
57 *should be, if that makes sense” – Food and drink manufacturer. The lack of consultation by*  
58  
59  
60



1  
2  
3  
4 the government with sectors who were not soft drinks manufacturers (for example out of  
5  
6  
7 home retailers) and the exclusion of milk-based sugary drinks led to this perception “...*milk-*  
8  
9  
10 *based drinks often carried bigger serving sizes and had more total sugar in them than any of*  
11  
12  
13 *our products would. They were excluded from the levy as well which looked like a big*  
14  
15  
16 *shortcoming.*” *Drink manufacturer.*

### ***Milk-based drinks increased the complexity in the out-of-home sector***

27 Interviewees explained that, from their perspective, the government did not think clearly  
28  
29  
30 about the technical implications for retailers and out-of-home sector and that it was easier for  
31  
32  
33 soft drink manufacturers to respond to the levy than it was for other industry actors “...*I*  
34  
35  
36 *don't think they understood the ways of working and the preparation methods in the out-of-*  
37  
38  
39 *home sector...*” – *Out-of-home food and drink manufacturer.* A high level of complexity  
40  
41  
42  
43 within the out-of-home sector to manufacture and produce drinks for immediate consumption  
44  
45  
46  
47 led to higher implementation costs; specifically, the exclusion of milk-based drinks and  
48  
49  
50  
51 specification around eligibility of drinks mixed with carbon dioxide, water and ice, and those  
52  
53  
54 with and without milk. “...*they were looking at the likes of drinks fountains for carbonated*  
55  
56  
57 *soft drinks because... a bag and box syrup, they would be mixed with ice or carbon dioxide*  
58  
59  
60

1  
2  
3  
4 *to give the carbonation or either they could be mixed with water and that would capture those*  
5  
6  
7 *drinks in the out-of-home sector, but there was a vagueness to milk-based drinks” – Out-of-*  
8  
9  
10 *home food and drink manufacturer. Some queries to Her Majesty’s Revenue and Customs*  
11  
12  
13 (HMRC – the tax collecting authority in the UK) went unanswered, thus, the out-of-home  
14  
15  
16  
17 sector had to interpret the legislation themselves and apply the SDIL according to their  
18  
19  
20 interpretation. Representatives of the out-of-home sector did not perceive two years as  
21  
22  
23 enough time to have prepared due to confusion surrounding eligibility. In contrast, soft drinks  
24  
25  
26  
27 manufacturers stated they had had time to prepare.  
28  
29  
30  
31  
32  
33

### ***Challenges for supermarkets with large product portfolios***

34  
35  
36  
37 Supermarkets felt disadvantaged compared to soft drink manufacturers by the complexities of  
38  
39  
40 their sector. They highlighted sector-specific challenges to adapting to the SDIL, including  
41  
42  
43 that their product portfolio not only contains branded drinks, about which they have to make  
44  
45  
46 decisions, but also private label (own brand) drinks “... *what branded suppliers chose to do*  
47  
48  
49 *was their choice...different brands choosing to reformulate, resize or inflate, which I think*  
50  
51  
52  
53 *led to a fair bit of customer confusion as to what the hell was going on. “ – Supermarket. It*  
54  
55  
56  
57 was described as challenging and time consuming to manage such a large portfolio and make  
58  
59  
60

1  
2  
3  
4 decisions on each product. Particularly as reformulation decisions and portion size reduction  
5  
6  
7 reportedly differed between brands yet had to be merchandised together within stores.  
8  
9

10 Retailers also felt that they were disadvantaged as their customers expressed confusion at  
11  
12  
13 differing responses by different brands – e.g. ‘sugary’ drinks reformulated to just below the  
14  
15  
16 SDIL threshold but containing both sugar and sweeteners confused customers, with queries  
17  
18  
19 directed at retailers rather than drinks manufacturers “... *we tried to make it as clear for*  
20  
21  
22  
23 *customers by putting on all the [shelves] sugar levy applied, so they could very much*  
24  
25  
26 *see...But...when they see a sugar line that’s not [included in the SDIL], that’s when the*  
27  
28  
29 *questions start coming.*” – *Supermarket.*  
30  
31  
32  
33  
34  
35  
36

### 37 ***Theme 2: Complex to implement but no lasting negative effects***

#### 38 ***Complexities in strategic response – price and product are key***

39  
40  
41  
42  
43 Industry responded to the SDIL by reviewing product portfolios and strategically selecting  
44  
45  
46 responses at the individual product level. This portfolio review approach is why responses  
47  
48  
49 differed between companies and between products. Research and development (R&D) and  
50  
51  
52 consumer testing were costly for industry during this process, and, linking to theme 1, there  
53  
54  
55  
56  
57 were increased costs for those companies with larger product portfolios (e.g. supermarkets).  
58  
59  
60

1  
2  
3  
4 For the out-of-home sector, additional complications were noted due to confusion over  
5  
6  
7 eligibility of some milk-based drinks “...government is very keen to always say “oh just  
8  
9  
10 reformulate, it will be easy” but it’s not easy. It actually takes a lot of time and investment.” –  
11  
12

13 *Drink manufacturer.*

14  
15  
16  
17  
18  
19  
20 Consumer testing was vital during the reformulation and decision-making process and  
21  
22  
23 consumer preference dictated the strategy taken “... we invested a significant amount of  
24  
25  
26 money...in developing lots and lots of different formulations with lower sugar to see and  
27  
28  
29 testing them with consumers in Great Britain to see whether those recipes... would be  
30  
31  
32 acceptable to consumers.” – *Drink manufacturer.* An additional challenge in reformulating  
33  
34  
35 drinks described by manufacturers was that sugar serves a functional purpose, in the  
36  
37  
38 mouthfeel of drinks mixed with ice and to prevent ‘brain freeze’, as well as to provide  
39  
40  
41 sweetness “Because, actually, yes, we could stick sweeteners in everything, but, actually,  
42  
43  
44 sugar also has like a functional role” – *Out-of-home retailer.*  
45  
46  
47  
48  
49  
50  
51  
52  
53

54 Packaging, merchandising and placement were challenges to overcome, particularly for  
55  
56  
57 supermarkets. Decisions were made on own brand products but also on how to retail other  
58  
59  
60

1  
2  
3  
4 branded products with different responses to the SDIL (e.g. reformulated drinks, reduced and  
5  
6  
7 increased portion sizes, rebranding) "...there were a number of products that didn't  
8  
9  
10 reformulate but did drop size. So, again, there's just small considerations in that around how  
11  
12  
13 you merchandise it... So what sounds like a relatively simple change, of dropping from  
14  
15  
16 330ml to, I don't know, 250ml, in reality kind of that complexity flows back through the  
17  
18  
19 value chain" – Supermarket.

### ***Leadership buy-in dictates strategic response***

20  
21  
22  
23  
24  
25  
26  
27  
28  
29  
30 Leadership buy-in to health, where senior management 'buy-in' to the idea that their  
31  
32  
33 company should be making pro-health decisions, was discussed as vital in dictating the  
34  
35  
36 strategic response to the SDIL "... I think such a review requires strong leadership and ... our  
37  
38  
39 COO was very clear that we needed to step in and we needed to do, you know, do the  
40  
41  
42 responsible, brave thing." -Drink manufacturer. Participants described this buy-in as making  
43  
44  
45 the process simpler and a lack of buy-in as a barrier to making timely progress "... having  
46  
47  
48 that strong leadership and, you know, complete buy-in from the top team and actually pretty  
49  
50  
51 much all the other levels of the organisation, then it's actually quite simple" – Drink  
52  
53  
54  
55  
56  
57 manufacturer.

### ***Global companies and internal systems***

The cost of setting up internal systems to account for and pay the SDIL was expensive, due to the requirement to report to HMRC, regardless of whether or not a company involved in the manufacture or selling of soft drinks was liable to pay the levy “...*It’s ridiculous that, you know, it’s cost us half a million pounds just to tell Treasury that actually we don’t need to pay it.*” – *Drink manufacturer*. The global nature of many of these companies was an additional challenge. Response strategies appropriate for a UK market may not be transferable to other countries, for example reformulation recipes vary due to differences in consumer palate and storage temperatures/facilities “...*that’s [computer system] for the UK, and then Ireland have a separate system, France have a separate system, Mexico have a separate system.*” – *Food and drink manufacturer*.

### ***Contradictory government messaging***

There was confusion over whether manufacturers needed to pass on price increases to change consumer behaviour due to contradictory government messaging over the aim of the SDIL. Participants indicated that they thought price increases should have been passed on to target

1  
2  
3 individual behaviour change; however, manufacturers stated they had no control over  
4  
5  
6 whether this occurred as retailers set the price for consumers “...[the] government had  
7  
8  
9  
10 *slightly mixed messages so it was pretty clear from the Department of Health and PHE*  
11  
12  
13 [Public Health England] ... *that they expected to see prices passed on ... I think the Treasury*  
14  
15  
16 *were trying to say, oh soft drinks manufacturers don't have to pass this on... Well, apart from*  
17  
18  
19 *the fact that most businesses won't absorb a cost if they can avoid it for obvious reasons, it*  
20  
21  
22 *was the opposite of what the Health Department and others wanted...*” – *Drink manufacturer.*  
23  
24  
25  
26  
27  
28  
29

### 30 ***Few long-lasting negative effects & SDIL provided opportunities***

31  
32  
33 Participants acknowledged that the SDIL did achieve its aim in stimulating product  
34  
35  
36 reformulation to avoid the levy. Although implementation was complex and costly, as  
37  
38  
39 previously illustrated, there were few long-lasting negative effects. Some participants  
40  
41  
42 suggested the SDIL provided opportunities “*I think some of them would have switched back*  
43  
44  
45  
46 *but we've gained new consumers as well which is, you know, how we, which through*  
47  
48  
49 *sampling and advertising essentially.*” – *Drink manufacturer.* However, participants were  
50  
51  
52  
53  
54  
55  
56  
57  
58  
59  
60 sceptical that the SDIL would achieve intended reductions in childhood obesity in the UK.

1  
2  
3  
4 *"... why [the SDIL] it was thought that that would be a, that policy in isolation would be*  
5  
6  
7 *sufficient to reduce obesity rates."* – Drink manufacturer.  
8  
9

10  
11  
12  
13 ***Theme 3: Why us? – The SDIL unfairly targets the drinks industry***  
14

15  
16  
17 ***Sugary drinks in isolation were unfair targets for regulation***  
18

19  
20 Participants felt that the SDIL unfairly targets the soft drinks industry. Participants expressed  
21  
22 their frustration that a single food category was targeted when other food categories bear a  
23  
24 significant proportion of the responsibility for childhood obesity. They expressed the view  
25  
26 that multiple nutrients or calories across many food and drink sectors should be targeted by  
27  
28 regulation if the government is serious about reducing childhood obesity, particularly as  
29  
30 substitution to other non-regulated food categories could negate the impact of the SDIL on  
31  
32 health *"... why would it be just the soft drink levy, why would you not target cakes and*  
33  
34 *biscuits...that's what we didn't understand at the time."* - Food and drink manufacturer..  
35  
36  
37  
38  
39  
40  
41  
42  
43  
44  
45  
46  
47  
48  
49

50  
51 There was consensus among participants that it did not make sense for the government to  
52  
53 target a category that they considered was already reducing sugar faster than other food  
54  
55 categories. Although the SDIL had accelerated the reformulation progress for some, this was  
56  
57  
58  
59  
60



1  
2  
3 stated to be already occurring prior to the SDIL announcement. Participants expressed the  
4  
5  
6  
7 view that the sector had been unfairly penalised, and that sectors which reformulate should be  
8  
9  
10 praised rather than targeted by regulation when other unregulated categories have contributed  
11  
12  
13 little towards achieving health goals. *"... the soft drinks category was already well embarked*  
14  
15  
16 *on the journey to reformulation...part of the industry's disappointment and frustration about*  
17  
18  
19 *the announcement of the levy was that they were already absolutely going to deliver what the*  
20  
21  
22 *levy has now kind of made them deliver"* – Trade association  
23  
24  
25  
26  
27  
28  
29

### ***Distrust of government's motivations to introduce the SDIL***

30  
31  
32  
33 Participants stated that the SDIL was politically motivated, not an evidence-based policy.  
34  
35  
36  
37 Government policies targeting obesity were described as contradictory and not aligned with  
38  
39  
40 one another, particularly the proposed ban on advertising of less healthy foods on TV and  
41  
42  
43 online [36]. According to participants, the advertising ban does not distinguish between  
44  
45  
46 reformulated and non-reformulated products, and acts as a disincentive to spending on  
47  
48  
49 reformulation if they cannot recoup their investment through advertising new products. *"So if*  
50  
51  
52 *you can take something from 40g of sugar to 20g of sugar but you'd only advertise on TV is*  
53  
54  
55  
56  
57  
58  
59  
60

1  
2  
3  
4 *it's 5(g), then why bother, right, and it also means that they can't tell the world, look at this*  
5  
6  
7 *amazing thing we've done, we've reformulated this" – Advertising consultant.*  
8  
9

10  
11  
12  
13 Perceived disconnectedness between policies led to distrust in the government and a belief  
14  
15  
16 that government obesity policy is poorly planned. Distrust was compounded by some  
17  
18  
19 companies appearing to be successful at lobbying the government following the  
20  
21  
22  
23 announcement, resulting in changes to the regulations as a result of this lobbying, rather than  
24  
25  
26 on the basis of health or nutrition, in particular the decision to exclude milk-based drinks.  
27  
28

29  
30 Participants stated this was motivated by some companies being able to gain a competitive  
31  
32  
33 advantage, as some milk-based drinks have higher sugar content than soft drinks. Participants  
34  
35  
36 also referred to the SDIL as a political tool to distract from other things in the budget in  
37  
38  
39 which it was announced "... *I think this was a decision taken within the Treasury by quite a*  
40  
41  
42  
43 *small group of people and it was announced during a Budget by a Chancellor who was trying*  
44  
45  
46 *to distract from some other economic figures that he maybe wasn't too pleased about."* –  
47  
48

49  
50 *Drink manufacturer.* The fact that the proposal to establish the SDIL had been kept secret,  
51  
52  
53 and the announcement was a shock to many, led to this view. *"I think the timing was a*  
54  
55  
56  
57  
58  
59  
60

1  
2  
3  
4 *surprise... Yeah and the way it was done without any form of consultation or pre-*  
5  
6  
7 *announcement." – Drink manufacturer.*  
8  
9

#### 10 11 12 13 ***Theme 4: Consumer is king***

##### 14 15 16 17 ***Consumer response to product changes resulting from the SDIL***

18  
19  
20 Industry participants discussed throughout all previous themes that meeting the wishes of  
21  
22  
23 consumers was the priority when responding to the SDIL. Taste preferences and tolerance of  
24  
25  
26 reformulation changes were critical and companies expressed concerns that consumers might  
27  
28  
29 dislike reformulated products if they changed dramatically in a short time period "...  
30  
31  
32 *obviously what's critical from our perspective is developing a product that consumers still*  
33  
34  
35  
36  
37 *like the taste of whilst reducing their sugar intake so that we were trying to marry-up those*  
38  
39  
40 *two things." – Drink manufacturer.* Company responses to the SDIL, as well as health and  
41  
42  
43 environmental issues more broadly, were vital to maintaining brand loyalty and company  
44  
45  
46 reputation in the eyes of consumers. The media were seen as influential in shaping consumer  
47  
48  
49 preferences and company reputation, as some newspapers had used graphics to show the  
50  
51  
52  
53  
54 sugar content of drinks and this was considered to have influenced purchasing patterns.  
55  
56  
57  
58  
59  
60

1  
2  
3  
4 According to informants a small group of very loyal consumers can cause a backlash  
5  
6  
7 publicly, which can be picked up by both the news media and social media.  
8  
9  
10  
11  
12

### 13 ***Consumer momentum towards healthier products***

14  
15  
16  
17 Participants stated consumer purchasing patterns are changing, with consumers increasingly  
18  
19  
20 choosing lower sugar products, which may also have driven reformulation prior to the SDIL.  
21  
22  
23 The policy acted as a catalyst for increasing consumer demand for sugar reduction and some  
24  
25  
26 respondents also highlighted the role of social media in driving these trends. Consumers were  
27  
28  
29 also reported by participants as “moving away from” artificial ingredients, which leads to  
30  
31  
32 challenges in reformulation using non-nutritive sweeteners *"A lot of our consumers like ..., ,*  
33  
34  
35  
36  
37 *they don't want to have sweeteners, they don't want to have preservatives" – Drink*  
38  
39  
40 *manufacturer.* Some participants suggested that consumers were not lost when sugar was  
41  
42  
43 reduced in their favourite products, due to consumer preferences moving towards prioritising  
44  
45  
46 health. It was important to participants and their organisations that consumers have enough  
47  
48  
49 choice and there were concerns that regulation could limit choice from some.  
50  
51  
52  
53  
54  
55  
56

### 57 ***Theme 5: The future of the SDIL***

1  
2  
3  
4 Participants discussed the potential of expanding the SDIL to fruit and milk-based drinks, the  
5  
6  
7 wider threat to other products, reformulation in other categories, changes in other sectors as a  
8  
9  
10 result of the SDIL and the possibility of its reversal by government.  
11  
12  
13  
14  
15  
16

### 17 *Extending to milk and fruit-based drinks*

18  
19  
20 Concerns were expressed over the Chancellor's proposal to extend the SDIL to milk-based  
21  
22  
23 and fruit-based drinks at the time of the announcement *"I don't think politicians think it's*  
24  
25  
26 *done. Obviously we've got the review next year on whether milk-based drinks should be*  
27  
28  
29 *included, and then I think it's 2021 when they'll review the levels as well."* – Drink  
30  
31  
32  
33 *manufacturer.* Participants stated the nutritional benefits of these meant that natural sugars  
34  
35  
36 (fructose and lactose) should not be subject to the same regulation as soft drinks. The vitamin  
37  
38  
39 and mineral content of these drinks was also discussed as a benefit to children who may not  
40  
41  
42 be consuming sufficient fruit, vegetables or calcium from other sources *"... Now you have*  
43  
44  
45 *products that are being developed with high levels of sugar in them so that really does need to*  
46  
47  
48 *be addressed but you don't want to go down the route of demonising milk because it is still a*  
49  
50  
51 *great source of nutrition."* – *Out-of-home food and drink manufacturer.* Reformulation of  
52  
53  
54  
55  
56  
57  
58  
59  
60

1  
2  
3 these drinks was considered particularly challenging, as naturally occurring sugars cannot be  
4  
5  
6  
7 removed in the same way as added sugars in soft drinks.  
8  
9  
10  
11  
12

### 13 ***Impact on the wider food and drink industry and in other sectors***

14  
15  
16 A wider threat to other products, particularly those included in the PHE Sugar Reduction  
17  
18 Strategy [37] (another element of the Childhood Obesity Plan that encouraged voluntary  
19  
20 industry reformulation) was discussed. The SDIL demonstrated that the government was  
21  
22  
23 willing to implement policy to regulate the food industry in a way that has not been done  
24  
25  
26 before. Food and drink companies discussed their companies' attempts to reformulate  
27  
28  
29 products not included in the SDIL. The SDIL was described as a rallying call for industry to  
30  
31  
32 improve the healthfulness of products. It was also perceived to cause a ripple effect not just  
33  
34  
35 regarding health but also sustainability, environment, media and promotions. *"Yeah, I think*  
36  
37  
38 *there is a ripple effect. So, I think it can be both positive and negative. I think in terms of*  
39  
40  
41 *positive, I think it can force companies to reformulate and be more innovative in driving the*  
42  
43  
44 *use of other ways of sweetening products"* - Food and drink manufacturer  
45  
46  
47  
48  
49  
50  
51  
52  
53  
54  
55  
56

### 57 ***Proposal to reverse the SDIL***

1  
2  
3  
4 Comments made by Boris Johnson in his leadership campaign to become prime minister  
5  
6  
7 (July 2019), suggested he might consider repealing the SDIL [38]. These were not taken well  
8  
9  
10 by some participants; who indicated that companies had invested heavily in implementing the  
11  
12  
13 levy *"I suppose it does feel like a backtrack [reversing the SDIL]. Like we've made all this*  
14  
15  
16 *work and it was at the time quite painful in the sense of it was such a massive change through*  
17  
18  
19 *the supply chain so there was so many things to think about" – Out-of-home food and drink*  
20  
21  
22 *manufacturer. However, some participants suggested that reversing the SDIL would be well*  
23  
24  
25 tolerated. *"I think, yeah, the industry would be happy to see the back of it because it's just*  
26  
27  
28 *cumbersome, it's just something, it's just another thing to administer." - Food and drink*  
29  
30  
31 *manufacturer.*  
32  
33  
34  
35  
36  
37  
38  
39  
40

## 41 Discussion

### 42 43 44 *Summary*

45  
46  
47 Senior industry perspectives on the SDIL are described in five main themes. Theme 1: *A*  
48  
49  
50 *level playing field...for some*, Theme 2: *Complex to implement, but no lasting negatives*,  
51  
52  
53  
54 Theme 3: *Why us? – the SDIL unfairly targets the drinks industry*, Theme 4: *The consumer is*  
55  
56  
57 *king*, and Theme 5: *The future of the SDIL*. The SDIL appeared to create a level playing field  
58  
59  
60

1  
2  
3  
4 which industry accepted, however, this was perceived as inadequate due to the exclusion of  
5  
6  
7 milk-based drinks and targeting only SSBs, giving some a competitive advantage.  
8  
9

10 Implementation of the SDIL was time consuming and complex, leading to high financial  
11  
12  
13 investment to prepare for it. Strategic response to the SDIL was dependent on leadership buy-  
14  
15  
16 in and particularly governed by potential consumer responses to product changes associated  
17  
18  
19 with the policy. The announcement and subsequent implementation of the SDIL caused a  
20  
21  
22 ripple effect beyond the soft drinks industry. The wider food and drink industry perceived it  
23  
24  
25 as evidence of the government being willing to regulate to help achieve health goals.  
26  
27  
28  
29  
30  
31  
32  
33

### 34 *Strengths and limitations*

35  
36  
37 The use of elite interviewing techniques to build relationships with and solicit meaningful  
38  
39  
40 responses from participants is a strength of this work. These techniques allowed us to obtain  
41  
42  
43 the views of senior professionals from commercial organisations who have often been  
44  
45  
46 difficult to recruit to other studies [39]. As evident from the challenges described in the out-  
47  
48  
49 of-home sector and supermarkets, including respondents outside of manufacturing allowed  
50  
51  
52 wider exploration of the systemic impacts of the SDIL. A limitation of this work, however, is  
53  
54  
55 that interviews were carried out over a long period of time due to challenges in recruitment.  
56  
57  
58  
59  
60



1  
2  
3  
4 Therefore, not all participants experienced the same political context, such as Boris Johnson's  
5  
6  
7 threats to reverse the SDIL in July 2019. Initial plans were for longitudinal data collection  
8  
9  
10 repeated across the time period of the study. Had all participants been interviewed closer to  
11  
12  
13 the implementation of the SDIL in 2018, then repeated in 2020, perspectives on the political  
14  
15  
16 events occurring would have been captured from all participants. Unfortunately, challenges to  
17  
18  
19 recruitment and access to elite participants led to the abandonment of this plan. Although  
20  
21  
22 researcher neutrality was expressed to participants the position of interviewers as public  
23  
24  
25 health academics could have led to these recruitment challenges.  
26  
27  
28  
29  
30  
31  
32

33  
34 The positionality of the researchers may also have led to censoring of responses by some  
35  
36  
37 participants. Whilst we sought to descriptively represent industry perspectives, as well as  
38  
39  
40 acknowledge our own biases that are typically pro-health policy, it is important to  
41  
42  
43 acknowledge that the food and drink industry will have their own biases against health policy  
44  
45  
46 that is detrimental to their business survival, as evidenced in previous work [40,41]. Although  
47  
48  
49 it was not the aim of the work to explore participant responses in relation to the commercial  
50  
51  
52 determinants of health, it is possible that participant responses did not represent the reality of  
53  
54  
55 what occurred behind the scenes in the food and drink industry in relation to the SDIL.  
56  
57  
58  
59  
60

1  
2  
3  
4 Overlap between some of the responses provided in this work and the ‘typical’ responses  
5  
6  
7 explored by other researchers as an industry ‘playbook’ [42] may support this assertion.  
8  
9  
10

### 11 12 13 *Interpretation and implications* 14

15  
16  
17 Interviewees reported that the technical aspects of drink production, particularly in the out-of-  
18  
19  
20 home sector, were not adequately accounted for in the design of the SDIL. An unintended  
21  
22  
23 consequence of the milk-based drink exclusion, led to some organisations having to interpret  
24  
25  
26 the particulars of the SDIL whilst their queries to HMRC went unanswered. Experiences of  
27  
28  
29 participants in this work align with findings that UK Government policy is set up poorly for  
30  
31  
32 the purposes of adequate monitoring and evaluation [43]. Future policy should engage with  
33  
34  
35 the wider food and beverage sector once a policy is certain to be implemented, to design and  
36  
37  
38 communicate technicalities in ways that avoid industry having to interpret themselves what is  
39  
40  
41 required and provide timely responses to queries surrounding implementation. Further,  
42  
43  
44 respondents indicated that lobbying against the inclusion of milk-based sugar sweetened  
45  
46  
47 beverages in the SDIL resulted in this exclusion. Alongside policy engagement in the  
48  
49  
50 technicalities of production, an avenue for future research would be to understand in more  
51  
52  
53  
54  
55  
56  
57  
58  
59  
60

1  
2  
3 detail the policy process surrounding the SDIL, particularly the influence of the food and  
4  
5  
6  
7 drink industry on the policy particulars.  
8  
9

10  
11  
12  
13 Reviewing their product portfolio was also discussed, where assessments of the product mix  
14  
15  
16 as a whole and by individual product were conducted when determining the response to the  
17  
18  
19 SDIL. This aligns with previous findings that soft drink companies monitor their internal and  
20  
21  
22  
23 external contexts to determine their products' market position in response to a stimulus such  
24  
25  
26 as the SDIL, and then respond with marketing or non-marketing activity to influence the  
27  
28  
29 purchasing of soft drinks [44]. A crucial external contextual component to response in our  
30  
31  
32  
33 findings appears to be consumer response and preferences towards each product, as well as  
34  
35  
36 health as a whole.  
37  
38  
39  
40  
41  
42  
43

44 The UK soft drinks industry was reformulating products to lower sugar alternatives several  
45  
46  
47 years before the SDIL was introduced [44,45]. Perspectives expressed by participants align  
48  
49  
50 with this and suggest that there is a shift towards healthier drinks as the primary offer for  
51  
52  
53 consumers, with the SDIL accelerating the pace of this change. Consumer preferences for  
54  
55  
56 healthier products, and our finding that industry prioritises these health preferences in their  
57  
58  
59  
60

1  
2  
3  
4 decision making, are likely to have triggered the soft drinks industry to reformulate products  
5  
6  
7 prior to the announcement of the SDIL. The advocacy (e.g. Jamie Oliver and Action on  
8  
9  
10 Sugar) in the early 2010s [46–48] and government threats to regulate industry [49] may have  
11  
12  
13 also increased consumer awareness about the health impact of sugar consumption and had a  
14  
15  
16 ‘signalling effect’ to consumers to reduce their sugar consumption [50]. Participants in our  
17  
18  
19 study suggested that the SDIL was adopted by the Government because of the existing  
20  
21  
22 popularity of sugar reduction among the public. It is likely that the UK public was aware that  
23  
24  
25 SSBs harm health much earlier than the policy announcement, resulting from media activity,  
26  
27  
28 such as that related to Jamie Oliver’s campaigning [46] PHE’s [47] and WHO’s reports on  
29  
30  
31 sugar [48]. Therefore, the importance of public momentum towards health could be regarded  
32  
33  
34 as a trigger for industry action independently from encouraging government action via policy.  
35  
36  
37  
38  
39  
40  
41  
42  
43  
44 Finally, participants expressed concern that policies introduced to combat obesity and other  
45  
46  
47 societal issues should be complementary not contradictory. The proposed ban on TV and  
48  
49  
50 online advertising of high fat, salt and sugar (HFSS) products by the UK Government [36]  
51  
52  
53 was viewed by industry to be misguided as they stated it may stop them being able to  
54  
55  
56 advertise their reformulated products; not just those impacted by the SDIL but products  
57  
58  
59  
60

1  
2  
3 voluntarily reformulated which would still be classified as HFSS. Stakeholder requests for  
4  
5  
6  
7 consistency across policy areas was also expressed by interviewees regarding this advertising  
8  
9  
10 ban [51]. This indicates that a more consistent approach to determining which products  
11  
12  
13 government wants industry to change would help ensure policies do not undermine one  
14  
15  
16  
17 another and build trust in government amongst industry.  
18  
19  
20  
21  
22

## 23 **Conclusion**

24  
25  
26  
27 This study explored food and drink industry perspectives on the SDIL. We found that  
28  
29  
30 industry accepted that legislation was useful in levelling the commercially competitive  
31  
32  
33 playing field. However, in practice participants stated that the SDIL had not created a 'true'  
34  
35  
36 level playing field as little consideration had been given to excluded product categories  
37  
38  
39 during policy design. Technical aspects of implementation were not adequately included and  
40  
41  
42 led to complexity for out of home retailers. Legislation on SSBs needs to take account of all  
43  
44  
45 industry sectors it affects, including out of home retail, as well as the manufacturing sector.  
46  
47  
48  
49 Participants stated that only targeting sugary soft drinks was unfair due to the progress  
50  
51  
52 already made in the category compared to others (e.g., confectionary). The critical role of  
53  
54  
55  
56  
57 consumers in creating momentum towards sugar reduction in SSBs prior to the SDIL  
58  
59  
60

1  
2  
3  
4 announcement, as well as dictating response to the SDIL was discussed. It is hypothesised  
5  
6  
7 that pro-health public views could be a useful lever in encouraging positive industry action  
8  
9  
10 independently of food and drink regulation. The impact of the SDIL was felt beyond the soft  
11  
12  
13 drinks industry, driving other product sectors to reformulate in anticipation of future  
14  
15  
16 regulation.  
17  
18  
19  
20  
21  
22

23 **Acknowledgements:** For the purpose of Open Access, the author has applied a Creative  
24  
25  
26  
27 Commons Attribution (CC BY) licence to any Author Accepted Manuscript version arising.  
28  
29  
30  
31  
32

33 **Competing interests:** None.  
34  
35  
36  
37  
38  
39

40 **Contributors:** Dr. Catrin P Jones: Conceptualization, Methodology, Formal analysis,  
41  
42  
43 Investigation, Data Curation, Writing - Original Draft, Project administration. Dr. Hannah  
44  
45  
46 Forde: Formal analysis, Writing - Review & Editing. Dr Tarra L. Penney: Conceptualization,  
47  
48  
49 Methodology, Investigation, Data Curation, Writing - Review & Editing, Funding  
50  
51  
52  
53 acquisition. Dr. Dolly R. Z. Theis: Formal analysis, Writing - Review & Editing  
54  
55  
56  
57  
58  
59  
60

1  
2  
3 Prof. Steven Cummins: Conceptualization, Methodology, Formal analysis, Writing - Review  
4  
5  
6  
7 & Editing, Supervision, Funding acquisition. Prof. Jean Adams: Formal analysis, Writing -  
8  
9  
10 Review & Editing, Funding acquisition. Dr. Cherry Law: Formal analysis, Writing - Review  
11  
12  
13 & Editing. Prof. Harry Rutter: Formal analysis, Writing - Review & Editing, Funding  
14  
15  
16 acquisition. Prof. Richard Smith: Formal analysis, Writing - Review & Editing, Funding  
17  
18 acquisition. Prof. Martin White: Conceptualization, Methodology, Resources, Supervision,  
19  
20  
21 Project administration, Funding acquisition, Formal analysis, Writing - Review & Editing.  
22  
23  
24  
25  
26  
27  
28  
29

30 **Funding:** This project was funded by the NIHR Public Health Research programme (Grant  
31  
32  
33 Nos. 16/49/01 and 16/130/01). At the time this study was conducted CPJ, MW, ELR, HF,  
34  
35  
36 TLP, DT, JA, OA, SA, were also supported in part by: Programme grants to the MRC  
37  
38  
39  
40  
41 Epidemiology Unit from the Medical Research Council (grant No. MC\_UU\_12015/6 and  
42  
43  
44 MC\_UU\_00006/7); and the Centre for Diet and Activity Research (CEDAR), a UKCRC  
45  
46  
47  
48 Public Health Research Centre of Excellence – funding from the British Heart Foundation,  
49  
50  
51  
52  
53  
54  
55  
56  
57  
58  
59  
60  
61  
62  
63  
64  
65  
66  
67  
68  
69  
70  
71  
72  
73  
74  
75  
76  
77  
78  
79  
80  
81  
82  
83  
84  
85  
86  
87  
88  
89  
90  
91  
92  
93  
94  
95  
96  
97  
98  
99  
100  
101  
102  
103  
104  
105  
106  
107  
108  
109  
110  
111  
112  
113  
114  
115  
116  
117  
118  
119  
120  
121  
122  
123  
124  
125  
126  
127  
128  
129  
130  
131  
132  
133  
134  
135  
136  
137  
138  
139  
140  
141  
142  
143  
144  
145  
146  
147  
148  
149  
150  
151  
152  
153  
154  
155  
156  
157  
158  
159  
160  
161  
162  
163  
164  
165  
166  
167  
168  
169  
170  
171  
172  
173  
174  
175  
176  
177  
178  
179  
180  
181  
182  
183  
184  
185  
186  
187  
188  
189  
190  
191  
192  
193  
194  
195  
196  
197  
198  
199  
200  
201  
202  
203  
204  
205  
206  
207  
208  
209  
210  
211  
212  
213  
214  
215  
216  
217  
218  
219  
220  
221  
222  
223  
224  
225  
226  
227  
228  
229  
230  
231  
232  
233  
234  
235  
236  
237  
238  
239  
240  
241  
242  
243  
244  
245  
246  
247  
248  
249  
250  
251  
252  
253  
254  
255  
256  
257  
258  
259  
260  
261  
262  
263  
264  
265  
266  
267  
268  
269  
270  
271  
272  
273  
274  
275  
276  
277  
278  
279  
280  
281  
282  
283  
284  
285  
286  
287  
288  
289  
290  
291  
292  
293  
294  
295  
296  
297  
298  
299  
300  
301  
302  
303  
304  
305  
306  
307  
308  
309  
310  
311  
312  
313  
314  
315  
316  
317  
318  
319  
320  
321  
322  
323  
324  
325  
326  
327  
328  
329  
330  
331  
332  
333  
334  
335  
336  
337  
338  
339  
340  
341  
342  
343  
344  
345  
346  
347  
348  
349  
350  
351  
352  
353  
354  
355  
356  
357  
358  
359  
360  
361  
362  
363  
364  
365  
366  
367  
368  
369  
370  
371  
372  
373  
374  
375  
376  
377  
378  
379  
380  
381  
382  
383  
384  
385  
386  
387  
388  
389  
390  
391  
392  
393  
394  
395  
396  
397  
398  
399  
400  
401  
402  
403  
404  
405  
406  
407  
408  
409  
410  
411  
412  
413  
414  
415  
416  
417  
418  
419  
420  
421  
422  
423  
424  
425  
426  
427  
428  
429  
430  
431  
432  
433  
434  
435  
436  
437  
438  
439  
440  
441  
442  
443  
444  
445  
446  
447  
448  
449  
450  
451  
452  
453  
454  
455  
456  
457  
458  
459  
460  
461  
462  
463  
464  
465  
466  
467  
468  
469  
470  
471  
472  
473  
474  
475  
476  
477  
478  
479  
480  
481  
482  
483  
484  
485  
486  
487  
488  
489  
490  
491  
492  
493  
494  
495  
496  
497  
498  
499  
500  
501  
502  
503  
504  
505  
506  
507  
508  
509  
510  
511  
512  
513  
514  
515  
516  
517  
518  
519  
520  
521  
522  
523  
524  
525  
526  
527  
528  
529  
530  
531  
532  
533  
534  
535  
536  
537  
538  
539  
540  
541  
542  
543  
544  
545  
546  
547  
548  
549  
550  
551  
552  
553  
554  
555  
556  
557  
558  
559  
560  
561  
562  
563  
564  
565  
566  
567  
568  
569  
570  
571  
572  
573  
574  
575  
576  
577  
578  
579  
580  
581  
582  
583  
584  
585  
586  
587  
588  
589  
590  
591  
592  
593  
594  
595  
596  
597  
598  
599  
600  
601  
602  
603  
604  
605  
606  
607  
608  
609  
610  
611  
612  
613  
614  
615  
616  
617  
618  
619  
620  
621  
622  
623  
624  
625  
626  
627  
628  
629  
630  
631  
632  
633  
634  
635  
636  
637  
638  
639  
640  
641  
642  
643  
644  
645  
646  
647  
648  
649  
650  
651  
652  
653  
654  
655  
656  
657  
658  
659  
660  
661  
662  
663  
664  
665  
666  
667  
668  
669  
670  
671  
672  
673  
674  
675  
676  
677  
678  
679  
680  
681  
682  
683  
684  
685  
686  
687  
688  
689  
690  
691  
692  
693  
694  
695  
696  
697  
698  
699  
700  
701  
702  
703  
704  
705  
706  
707  
708  
709  
710  
711  
712  
713  
714  
715  
716  
717  
718  
719  
720  
721  
722  
723  
724  
725  
726  
727  
728  
729  
730  
731  
732  
733  
734  
735  
736  
737  
738  
739  
740  
741  
742  
743  
744  
745  
746  
747  
748  
749  
750  
751  
752  
753  
754  
755  
756  
757  
758  
759  
760  
761  
762  
763  
764  
765  
766  
767  
768  
769  
770  
771  
772  
773  
774  
775  
776  
777  
778  
779  
780  
781  
782  
783  
784  
785  
786  
787  
788  
789  
790  
791  
792  
793  
794  
795  
796  
797  
798  
799  
800  
801  
802  
803  
804  
805  
806  
807  
808  
809  
810  
811  
812  
813  
814  
815  
816  
817  
818  
819  
820  
821  
822  
823  
824  
825  
826  
827  
828  
829  
830  
831  
832  
833  
834  
835  
836  
837  
838  
839  
840  
841  
842  
843  
844  
845  
846  
847  
848  
849  
850  
851  
852  
853  
854  
855  
856  
857  
858  
859  
860  
861  
862  
863  
864  
865  
866  
867  
868  
869  
870  
871  
872  
873  
874  
875  
876  
877  
878  
879  
880  
881  
882  
883  
884  
885  
886  
887  
888  
889  
890  
891  
892  
893  
894  
895  
896  
897  
898  
899  
900  
901  
902  
903  
904  
905  
906  
907  
908  
909  
910  
911  
912  
913  
914  
915  
916  
917  
918  
919  
920  
921  
922  
923  
924  
925  
926  
927  
928  
929  
930  
931  
932  
933  
934  
935  
936  
937  
938  
939  
940  
941  
942  
943  
944  
945  
946  
947  
948  
949  
950  
951  
952  
953  
954  
955  
956  
957  
958  
959  
960  
961  
962  
963  
964  
965  
966  
967  
968  
969  
970  
971  
972  
973  
974  
975  
976  
977  
978  
979  
980  
981  
982  
983  
984  
985  
986  
987  
988  
989  
990  
991  
992  
993  
994  
995  
996  
997  
998  
999  
1000

1  
2  
3 funding for her PhD studentship from the Economic and Social Research Council and Public  
4  
5  
6  
7 Health England, and she has received further discretionary funding from the Economic and  
8  
9  
10 Social Research Council and Murray Edwards College, Cambridge. The views expressed are  
11  
12  
13 those of the authors and not necessarily those of the any of the above-named funders. The  
14  
15  
16 funders had no role in study design, data collection and analysis, decision to publish, or  
17  
18  
19 preparation of the manuscript.  
20  
21  
22  
23  
24  
25  
26

27 **Data availability statement:** To maintain participant anonymity and confidentiality, data is not  
28  
29  
30 available due to the identifiable nature of participants from transcripts and recordings.  
31  
32  
33  
34  
35  
36

37 **Ethics approval statement:** The study was approved by the Humanities and Social Science  
38  
39  
40 Ethics Committee at the University of Cambridge, UK (no approval ID was provided).  
41  
42  
43  
44  
45  
46

## 47 **References**

- 48  
49  
50 1 Afshin A, Sur PJ, Fay KA, *et al.* Health effects of dietary risks in 195 countries, 1990–  
51  
52 2017: a systematic analysis for the Global Burden of Disease Study 2017. *The Lancet*  
53  
54 2019;**393**:1958–72. doi:10.1016/S0140-6736(19)30041-8
- 55  
56 2 World Health Organization. Taxes on sugary drinks: Why do it? World Health  
57  
58 Organization 2017.  
59  
60



- 1  
2  
3  
4 3 Andreyeva T, Marple K, Marinello S, *et al*. Outcomes following taxation of sugar-  
5 sweetened beverages: a systematic review and meta-analysis. *JAMA Netw Open*  
6 *2022;5:e2215276–e2215276*.  
7  
8 4 Teng AM, Jones AC, Mizdrak A, *et al*. Impact of sugar-sweetened beverage taxes on  
9 purchases and dietary intake: systematic review and meta-analysis. *Obesity Reviews*  
10 *2019;20:1187–204*.  
11  
12 5 Cawley J, Frisvold D. Taxes on sugar-sweetened beverages: Political economy, and  
13 effects on prices, purchases, and consumption. *Food Policy* *2023;117:102441*.  
14  
15 6 The World Bank. Global SSB Tax Database. <https://ssbtax.worldbank.org/> (accessed  
16 25 May 2023).  
17  
18 7 HM Revenue & Customs. Soft Drinks Industry Levy.  
19 2016.[https://www.gov.uk/government/publications/soft-drinks-industry-levy/soft-](https://www.gov.uk/government/publications/soft-drinks-industry-levy/soft-drinks-industry-levy#:~:text=from the levy.-,Policy objective,to reduce the sugar content (accessed 16 Jun 2020))  
20 [drinks-industry-levy#:~:text=from the levy.-,Policy objective,to reduce the sugar](https://www.gov.uk/government/publications/soft-drinks-industry-levy/soft-drinks-industry-levy#:~:text=from the levy.-,Policy objective,to reduce the sugar content (accessed 16 Jun 2020))  
21 [content \(accessed 16 Jun 2020\)](https://www.gov.uk/government/publications/soft-drinks-industry-levy/soft-drinks-industry-levy#:~:text=from the levy.-,Policy objective,to reduce the sugar content (accessed 16 Jun 2020)).  
22  
23 8 HM Revenue and Customs. Soft Drinks Industry Levy statistics background and  
24 references. 2022.[https://www.gov.uk/government/statistics/soft-drinks-industry-levy-](https://www.gov.uk/government/statistics/soft-drinks-industry-levy-statistics/soft-drinks-industry-levy-statistics-background-and-references (accessed 10 Nov 2022))  
25 [statistics/soft-drinks-industry-levy-](https://www.gov.uk/government/statistics/soft-drinks-industry-levy-statistics/soft-drinks-industry-levy-statistics-background-and-references (accessed 10 Nov 2022))  
26 [statistics-background-and-references \(accessed 10](https://www.gov.uk/government/statistics/soft-drinks-industry-levy-statistics/soft-drinks-industry-levy-statistics-background-and-references (accessed 10 Nov 2022))  
27 [Nov 2022\)](https://www.gov.uk/government/statistics/soft-drinks-industry-levy-statistics/soft-drinks-industry-levy-statistics-background-and-references (accessed 10 Nov 2022)).  
28  
29 9 Cabinet Office, Department of Health and Social Care, HM Treasury, *et al*. Childhood  
30 obesity: a plan for action.  
31 2016.[https://www.gov.uk/government/publications/childhood-obesity-a-plan-for-](https://www.gov.uk/government/publications/childhood-obesity-a-plan-for-action (accessed 8 Apr 2021))  
32 [action \(accessed 8 Apr 2021\)](https://www.gov.uk/government/publications/childhood-obesity-a-plan-for-action (accessed 8 Apr 2021)).  
33  
34 10 Department of Health and Social Care. Childhood obesity: a plan for action, chapter 2.  
35 2018.  
36  
37 11 HM Revenue & Customs. Guidance: Check if you need to register for the Soft Drinks  
38 Industry Levy. 2018.[https://www.gov.uk/guidance/check-if-you-need-to-register-for-](https://www.gov.uk/guidance/check-if-you-need-to-register-for-the-soft-drinks-industry-levy (accessed 21 May 2023))  
39 [the-soft-drinks-industry-levy \(accessed 21 May 2023\)](https://www.gov.uk/guidance/check-if-you-need-to-register-for-the-soft-drinks-industry-levy (accessed 21 May 2023)).  
40  
41 12 Gauke D. Budget 2016. 2016. [https://www.gov.uk/government/publications/budget-](https://www.gov.uk/government/publications/budget-2016-documents)  
42 [2016-documents](https://www.gov.uk/government/publications/budget-2016-documents)  
43  
44 13 HM Treasury, Osborne. G. Budget 2016: George Osborne’s speech.  
45 2016.[https://www.gov.uk/government/speeches/budget-2016-george-osbornes-speech](https://www.gov.uk/government/speeches/budget-2016-george-osbornes-speech (accessed 6 Apr 2023))  
46  [\(accessed 6 Apr 2023\)](https://www.gov.uk/government/speeches/budget-2016-george-osbornes-speech (accessed 6 Apr 2023)).  
47  
48 14 Rogers NT, Cummins S, Forde H, *et al*. Associations between trajectories of obesity  
49 prevalence in English primary school children and the UK soft drink industry levy: an  
50  
51  
52  
53  
54  
55  
56  
57  
58  
59  
60

- 1  
2  
3  
4 interrupted time series analysis of surveillance data. *medRxiv* Published Online First:  
5 2022. doi:<https://doi.org/10.1101/2022.09.16.22280030>  
6
- 7 15 Hilton S, Buckton CH, Patterson C, *et al.* Following in the footsteps of tobacco and  
8 alcohol? Stakeholder discourse in UK newspaper coverage of the Soft Drinks Industry  
9 Levy. *Public Health Nutr* 2019;**22**:2317–28. doi:10.1017/S1368980019000739  
10
- 11 16 Economics O. The Economic Impact of the Soft Drinks Levy, Final Report. *London:*  
12 *Oxford Economics* 2016.  
13
- 14 17 Penney TL, Adams J, White M. Industry reactions to the UK Soft Drinks Industry  
15 Levy: Unpacking the evolving discourse from announcement to implementation. *J*  
16 *Epidemiol Community Health (1978)* 2018;**72**:A43. doi:10.1136/jech-2018-  
17 SSMabstracts.88  
18
- 19 18 Law C, Cornelsen L, Adams J, *et al.* An analysis of the stock market reaction to the  
20 announcements of the UK Soft Drinks Industry Levy. *Econ Hum Biol*  
21 2020;**38**:100834. doi:10.1016/j.ehb.2019.100834  
22
- 23 19 Law C, Cornelsen L, Adams J, *et al.* The impact of UK Soft Drinks Industry Levy on  
24 manufacturers' domestic turnover. *Econ Hum Biol* 2020;:100866.  
25
- 26 20 Penney T, Adams J, White M. LB4 Industry reactions to the UK soft drinks industry  
27 levy: unpacking the evolving discourse from announcement to implementation. *BMJ*  
28 2018. A43.1-A43. doi:10.1136/jech-2018-ssmabstracts.88  
29
- 30 21 Hilton S, Buckton CH, Katikireddi SV, *et al.* Who says what about sugar-sweetened  
31 beverage tax? Stakeholders' framing of evidence: a newspaper analysis. *The Lancet*  
32 2017;**390**:S44. doi:10.1016/s0140-6736(17)32979-3  
33
- 34 22 Buckton CH, Hilton S, Patterson C, *et al.* DID PROPONENTS AND OPPONENTS  
35 OF THE SOFT DRINKS INDUSTRY LEVY USE THE NEWS MEDIA TO  
36 INFLUENCE THE POLICY DEBATE? A QUALITATIVE DISCOURSE  
37 ANALYSIS USING PRACTICAL REASONING. *J Epidemiol Community Health*  
38 (1978) 2018;**72**:A1–2. doi:10.1136/jech-2018-SSMabstracts.2  
39
- 40 23 Buckton CH, Patterson C, Hyseni L, *et al.* The palatability of sugar-sweetened  
41 beverage taxation: A content analysis of newspaper coverage of the UK sugar debate.  
42 *PLoS One* 2018;**13**:1–15. doi:10.1371/journal.pone.0207576  
43
- 44 24 Forde H, Penney TL, White M, *et al.* Understanding Marketing Responses to a Tax on  
45 Sugary Drinks: A Qualitative Interview Study in the United Kingdom, 2019. *Int J*  
46 *Health Policy Manag* Published Online First: 23 February 2022.  
47 doi:10.34172/ijhpm.2022.5465  
48  
49  
50  
51  
52  
53  
54  
55  
56  
57  
58  
59  
60

- 1  
2  
3  
4 25 Braun V, Clarke V. *Successful Qualitative Research: A Practical Guide for Beginners*.  
5 SAGE 2013.  
6  
7 26 White M. Evaluation of the health impacts of the UK Treasury Soft Drinks Industry  
8 Levy (SDIL). 2017;;1–  
9  
10 46.<https://www.journalslibrary.nihr.ac.uk/programmes/phr/1613001/#/>  
11  
12 27 Harvey WS. Methodological Approaches for Interviewing Elites. *Geogr Compass*  
13 2010;**4**:193–205. doi:10.1111/j.1749-8198.2009.00313.x  
14  
15 28 Berry JM, Browne W. Validity and Reliability Issues In Elite Interviewing. *PS Polit*  
16 *Sci Polit* 2003;**35**:679–82.  
17  
18 29 Harvey WS. Strategies for conducting elite interviews. *Qualitative Research*  
19 2011;**11**:431–41. doi:10.1177/1468794111404329  
20  
21 30 Goldstein K. Getting in the Door: Sampling and Completing Elite Interviews. *Political*  
22 *Science & Politics* 2002;**35**:669–72. doi:10.1017/S1049096502001130  
23  
24 31 Stephens N. Collecting data from elites and ultra elites: Telephone and face-to-face  
25 interviews with macroeconomists. *Qualitative Research* 2007;**7**:203–16.  
26  
27 doi:10.1177/1468794107076020  
28  
29 32 Braun V, Clarke V. Using thematic analysis in psychology. *Qual Res Psychol*  
30 2006;**3**:77–101.  
31  
32 33 Braun V, Clarke V. Can I use TA? Should I use TA? Should I not use TA? Comparing  
33 reflexive thematic analysis and other pattern-based qualitative analytic approaches.  
34  
35 *Couns Psychother Res* 2020;;37–47. doi:10.1002/capr.12360  
36  
37 34 Braun V, Clarke V. What can ‘thematic analysis’ offer health and wellbeing  
38 researchers? *Int J Qual Stud Health Well-being* 2014;**9**. doi:10.3402/qhw.v9.26152  
39  
40 35 Department of Health and Social Care. Calorie labelling in the out of home sector:  
41 implementation guidance. 2021.<https://www.gov.uk/government/publications/calorie-labelling-in-the-out-of-home-sector/calorie-labelling-in-the-out-of-home-sector-implementation-guidance#:~:text=The%20out%20of%20home%20sector%20is%20generally%20considered%20to%20be,on%20or%20off%20the%20premises> (accessed 14 Dec 2022).  
42  
43 36 Department for Digital Culture Media & Sport, Department of Health & Social Care.  
44 Introducing a total online advertising restriction for products high in fat, sugar and salt  
45 (HFSS). 2021.<https://www.gov.uk/government/consultations/total-restriction-of-online-advertising-for-products-high-in-fat-sugar-and-salt-hfss/introducing-a-total->  
46  
47  
48  
49  
50  
51  
52  
53  
54  
55  
56  
57  
58  
59  
60

- 1  
2  
3  
4 online-advertising-restriction-for-products-high-in-fat-sugar-and-salt-hfss (accessed 6  
5 Jan 2023).
- 6  
7 37 Office for Health Improvement and Disparities. Sugar, salt and calorie reduction and  
8 reformulation. 2017.<https://www.gov.uk/government/collections/sugar-reduction>  
9 (accessed 11 Jan 2023).
- 10  
11 38 Stewart H. ‘Sin taxes’: Boris Johnson vows to review sugar levy. *The Guardian*.  
12 2019.[https://www.theguardian.com/politics/2019/jul/03/boris-johnson-vows-to-](https://www.theguardian.com/politics/2019/jul/03/boris-johnson-vows-to-review-whether-sugar-tax-improves-health)  
13 [review-whether-sugar-tax-improves-health](https://www.theguardian.com/politics/2019/jul/03/boris-johnson-vows-to-review-whether-sugar-tax-improves-health) (accessed 19 Oct 2022).
- 14  
15 39 Forde H, Penney T, White M, *et al*. A Framework for Understanding Marketing  
16 Responses to a Tax on Sugary Drinks: a Qualitative Interview Study in the United  
17 Kingdom, 2019. *Int J Health Policy Manag* 2022.
- 18  
19 40 Lacy-Nichols J, Marten R, Crosbie E, *et al*. The public health playbook: ideas for  
20 challenging the corporate playbook. *Lancet Glob Health* 2022.
- 21  
22 41 Wiist WH. The corporate play book, health, and democracy: the snack food and  
23 beverage industry’s tactics in context. *Sick societies: Responding to the global*  
24 *challenge of chronic disease* 2011;:204–16.
- 25  
26 42 Petticrew M, Katikireddi SV, Knai C, *et al*. ‘Nothing can be done until everything is  
27 done’: The use of complexity arguments by food, beverage, alcohol and gambling  
28 industries. *J Epidemiol Community Health (1978)* 2017;71:1078–83.  
29 doi:10.1136/jech-2017-209710
- 30  
31 43 Theis D, White M. Is Obesity Policy in England Fit for Purpose? Analysis of  
32 Government Strategies and Policies, 1992–2020. *Milbank Quarterly* 2021;99:126–70.  
33 doi:10.1111/1468-0009.12498
- 34  
35 44 Forde H, Penney T, White M, *et al*. Understanding Marketing Responses to a Tax on  
36 Sugary Drinks: a Qualitative Interview Study in the United Kingdom, 2019. *Int J*  
37 *Health Policy Manag* 2022.
- 38  
39 45 Scarborough P, Adhikari V, Harrington RA, *et al*. Impact of the announcement and  
40 implementation of the UK Soft Drinks Industry Levy on sugar content, price, product  
41 size and number of available soft drinks in the UK, 2015-19: A controlled interrupted  
42 time series analysis. *PLoS Med* 2020;17:e1003025.
- 43  
44 46 Boseley S. Jamie Oliver’s Sugar Rush: a crusade to save Britain’s health. *The*  
45 *Guardian*. 2015.
- 46  
47  
48  
49  
50  
51  
52  
53  
54  
55  
56  
57  
58  
59  
60

- 1  
2  
3  
4 47 Tedstone A, Targett V, Allen R. Sugar Reduction: The evidence for action About  
5 Public Health England. *Public Health England* Published Online First:  
6 2015. [www.gov.uk/phe%5Cnwww.facebook.com/PublicHealthEngland](http://www.gov.uk/phe%5Cnwww.facebook.com/PublicHealthEngland)  
7  
8  
9 48 World Health Organization. Sugars intake for adults and children. 2015.  
10 <https://www.who.int/publications/i/item/9789241549028> (accessed 14 Oct 2022).  
11  
12 49 Nieburg O. Kellogg shuns ‘silver bullet’ 30% UK cereals sugar cap.  
13 [bakeryandsnacks.com](http://bakeryandsnacks.com).  
14  
15 2013. [https://www.bakeryandsnacks.com/Article/2013/01/07/Kellogg-shuns-30-sugar-](https://www.bakeryandsnacks.com/Article/2013/01/07/Kellogg-shuns-30-sugar-cap-proposal-for-UK-cereals)  
16 [cap-proposal-for-UK-cereals](https://www.bakeryandsnacks.com/Article/2013/01/07/Kellogg-shuns-30-sugar-cap-proposal-for-UK-cereals) (accessed 6 Jan 2023).  
17  
18 50 Rose D, Theis Z. What influences government policymaking? The case of childhood  
19 obesity in England. 2022.  
20  
21 51 Forde H, Boyland EJ, Scarborough P, *et al*. Exploring the potential impact of the  
22 proposed UK TV and online food advertising regulations: a concept mapping study.  
23 *BMJ Open* 2022;12. doi:10.1136/bmjopen-2021-060302  
24  
25  
26  
27  
28  
29  
30  
31  
32  
33  
34  
35  
36  
37  
38  
39  
40  
41  
42  
43  
44  
45  
46  
47  
48  
49  
50  
51  
52  
53  
54  
55  
56  
57  
58  
59  
60

### Supplementary File 1: Researcher Reflexivity

Braun and Clarke discuss reflexivity as a fundamental characteristic of thematic analysis, involving critical reflection of researcher perspectives, and how these will be integrated within the analysis and interpretation of data [22]. The complete elimination of bias is not something that can be achieved in qualitative research and more importantly should not be an aim. Unlike statistical analysis, the researcher is the tool of analysis. The researcher therefore is an integral part of the analytic process and to conduct qualitative thematic analysis well, they must develop an understanding of how their own perspectives, position and view of reality helps illuminate will influence the analysis [22].

This study aimed to centre participants' words in a descriptive manner to preserve their intention. This approach was also chosen due to reflection by the research team on our positionality as public health academics. We aimed to understand industry perspectives regarding the SDIL; however, it is important to acknowledge that the personal and professional goals of the research team (authors on this paper) as public health researchers are likely to be different from those of people working in the food and drink industry. Therefore, a descriptive approach was selected which prizes participants' words and perspectives over and above researcher interpretations. Whilst our perspectives have still influenced the analysis, as they should in good qualitative practice, we sought to minimise the influence of our biases and negativity towards some of the practices of the food and drink industry, to truly 'listen' to the perspectives of our participants. As a result, a modified version of Braun and Clarke's thematic analysis was used; reflexivity was a priority throughout the analysis in line with the approach however we sought to be less interpretive than their more recent guidance proposes [22].

1  
2  
3  
4  
5  
6 It is also important to note that, although we have taken a descriptive approach, the results  
7  
8 represent participant perspectives. Whilst the researchers work to put aside their biases which  
9  
10 may lean towards those more critical of the food and drink industry; statements, findings and  
11  
12 themes found do not represent an objective truth, rather the reported perspectives of  
13  
14 participants. We urge readers of this work to use their own critical reflection when  
15  
16 interpreting and using these findings.  
17  
18  
19  
20  
21  
22  
23  
24  
25  
26  
27  
28  
29  
30  
31  
32  
33  
34  
35  
36  
37  
38  
39  
40  
41  
42  
43  
44  
45  
46  
47  
48  
49  
50  
51  
52  
53  
54  
55  
56  
57  
58  
59  
60

## COREQ (COnsolidated criteria for REporting Qualitative research) Checklist

A checklist of items that should be included in reports of qualitative research. You must report the page number in your manuscript where you consider each of the items listed in this checklist. If you have not included this information, either revise your manuscript accordingly before submitting or note N/A.

| Topic                                          | Item No. | Guide Questions/Description                                                                                                                              | Reported on Page No. |
|------------------------------------------------|----------|----------------------------------------------------------------------------------------------------------------------------------------------------------|----------------------|
| <b>Domain 1: Research team and reflexivity</b> |          |                                                                                                                                                          |                      |
| <i>Personal characteristics</i>                |          |                                                                                                                                                          |                      |
| Interviewer/facilitator                        | 1        | Which author/s conducted the interview or focus group?                                                                                                   |                      |
| Credentials                                    | 2        | What were the researcher's credentials? E.g. PhD, MD                                                                                                     |                      |
| Occupation                                     | 3        | What was their occupation at the time of the study?                                                                                                      |                      |
| Gender                                         | 4        | Was the researcher male or female?                                                                                                                       |                      |
| Experience and training                        | 5        | What experience or training did the researcher have?                                                                                                     |                      |
| <i>Relationship with participants</i>          |          |                                                                                                                                                          |                      |
| Relationship established                       | 6        | Was a relationship established prior to study commencement?                                                                                              |                      |
| Participant knowledge of the interviewer       | 7        | What did the participants know about the researcher? e.g. personal goals, reasons for doing the research                                                 |                      |
| Interviewer characteristics                    | 8        | What characteristics were reported about the interviewer/facilitator? e.g. Bias, assumptions, reasons and interests in the research topic                |                      |
| <b>Domain 2: Study design</b>                  |          |                                                                                                                                                          |                      |
| <i>Theoretical framework</i>                   |          |                                                                                                                                                          |                      |
| Methodological orientation and Theory          | 9        | What methodological orientation was stated to underpin the study? e.g. grounded theory, discourse analysis, ethnography, phenomenology, content analysis |                      |
| <i>Participant selection</i>                   |          |                                                                                                                                                          |                      |
| Sampling                                       | 10       | How were participants selected? e.g. purposive, convenience, consecutive, snowball                                                                       |                      |
| Method of approach                             | 11       | How were participants approached? e.g. face-to-face, telephone, mail, email                                                                              |                      |
| Sample size                                    | 12       | How many participants were in the study?                                                                                                                 |                      |
| Non-participation                              | 13       | How many people refused to participate or dropped out? Reasons?                                                                                          |                      |
| <i>Setting</i>                                 |          |                                                                                                                                                          |                      |
| Setting of data collection                     | 14       | Where was the data collected? e.g. home, clinic, workplace                                                                                               |                      |
| Presence of non-participants                   | 15       | Was anyone else present besides the participants and researchers?                                                                                        |                      |
| Description of sample                          | 16       | What are the important characteristics of the sample? e.g. demographic data, date                                                                        |                      |
| <i>Data collection</i>                         |          |                                                                                                                                                          |                      |
| Interview guide                                | 17       | Were questions, prompts, guides provided by the authors? Was it pilot tested?                                                                            |                      |
| Repeat interviews                              | 18       | Were repeat interviews carried out? If yes, how many?                                                                                                    |                      |
| Audio/visual recording                         | 19       | Did the research use audio or visual recording to collect the data?                                                                                      |                      |
| Field notes                                    | 20       | Were field notes made during and/or after the interview or focus group?                                                                                  |                      |
| Duration                                       | 21       | What was the duration of the interviews or focus group?                                                                                                  |                      |
| Data saturation                                | 22       | Was data saturation discussed?                                                                                                                           |                      |
| Transcripts returned                           | 23       | Were transcripts returned to participants for comment and/or                                                                                             |                      |



| Topic                                  | Item No. | Guide Questions/Description                                                                                                        | Reported on Page No. |
|----------------------------------------|----------|------------------------------------------------------------------------------------------------------------------------------------|----------------------|
|                                        |          | correction?                                                                                                                        |                      |
| <b>Domain 3: analysis and findings</b> |          |                                                                                                                                    |                      |
| <i>Data analysis</i>                   |          |                                                                                                                                    |                      |
| Number of data coders                  | 24       | How many data coders coded the data?                                                                                               |                      |
| Description of the coding tree         | 25       | Did authors provide a description of the coding tree?                                                                              |                      |
| Derivation of themes                   | 26       | Were themes identified in advance or derived from the data?                                                                        |                      |
| Software                               | 27       | What software, if applicable, was used to manage the data?                                                                         |                      |
| Participant checking                   | 28       | Did participants provide feedback on the findings?                                                                                 |                      |
| <i>Reporting</i>                       |          |                                                                                                                                    |                      |
| Quotations presented                   | 29       | Were participant quotations presented to illustrate the themes/findings?<br>Was each quotation identified? e.g. participant number |                      |
| Data and findings consistent           | 30       | Was there consistency between the data presented and the findings?                                                                 |                      |
| Clarity of major themes                | 31       | Were major themes clearly presented in the findings?                                                                               |                      |
| Clarity of minor themes                | 32       | Is there a description of diverse cases or discussion of minor themes?                                                             |                      |

Developed from: Tong A, Sainsbury P, Craig J. Consolidated criteria for reporting qualitative research (COREQ): a 32-item checklist for interviews and focus groups. *International Journal for Quality in Health Care*. 2007. Volume 19, Number 6: pp. 349 – 357

**Once you have completed this checklist, please save a copy and upload it as part of your submission. DO NOT include this checklist as part of the main manuscript document. It must be uploaded as a separate file.**
